# Supplementary material for: Synthesis of hydrazinoheterocycles from Morita–Baylis–Hillman adducts of nitroalkenes with azodicarboxylates
Source: Royal Society of Chemistry journal article supplement (doi:10.1039/c5ob02656c), 2016-01-01
Supplement: c5ob02656c1.pdf [file c5ob02656c1.pdf]

NMR Spectra

for

**Synthesis of Hydrazinoheterocycles from Morita-Baylis-Hillman Adducts of Nitroalkenes with Azodicarboxylates**

Vaijinath Mane, Jyoti Pandey, Narasimham Ayyagari, Chandan Dey, Raju Kale and Irishi N. N. Namboothiri\*

Department of Chemistry, Indian Institute of Technology Bombay, Mumbai 400 076, India

| Entry | Table of Contents                                                       | Page |
|-------|-------------------------------------------------------------------------|------|
| 1     | Figure S1. $^1\text{H}$ NMR Spectrum of <b>3a</b>                       | 4    |
| 2     | Figure S2. $^{13}\text{C}$ NMR Spectrum of <b>3a</b>                    | 5    |
| 3     | Figure S3. $^1\text{H}$ NMR Spectrum of <b>3b</b>                       | 6    |
| 4     | Figure S4. $^{13}\text{C}$ NMR Spectrum of <b>3b</b>                    | 7    |
| 5     | Figure S5. $^1\text{H}$ NMR Spectrum of <b>3c</b>                       | 8    |
| 6     | Figure S6. $^{13}\text{C}$ NMR Spectrum of <b>3c</b>                    | 9    |
| 7     | Figure S7. $^{13}\text{C}$ -APT NMR Spectrum of <b>3c</b>               | 10   |
| 8     | Figure S8. $^1\text{H}$ - $^1\text{H}$ COSY NMR Spectrum of <b>3c</b>   | 11   |
| 9     | Figure S9. $^1\text{H}$ - $^1\text{H}$ NOESY NMR Spectrum of <b>3c</b>  | 12   |
| 10    | Figure S10. $^1\text{H}$ NMR Spectrum of <b>3d</b>                      | 13   |
| 11    | Figure S11. $^{13}\text{C}$ NMR Spectrum of <b>3d</b>                   | 14   |
| 12    | Figure S12. $^1\text{H}$ NMR Spectrum of <b>3e</b>                      | 15   |
| 13    | Figure S13. $^{13}\text{C}$ NMR Spectrum of <b>3e</b>                   | 16   |
| 14    | Figure S14. $^{13}\text{C}$ -APT NMR Spectrum of <b>3e</b>              | 17   |
| 15    | Figure S15. $^1\text{H}$ - $^1\text{H}$ NOESY NMR Spectrum of <b>3e</b> | 18   |
| 16    | Figure S16. $^1\text{H}$ NMR Spectrum of <b>3f</b>                      | 19   |
| 17    | Figure S17. $^{13}\text{C}$ NMR Spectrum of <b>3f</b>                   | 20   |
| 18    | Figure S18. $^1\text{H}$ NMR Spectrum of <b>4a</b>                      | 21   |
| 19    | Figure S19. $^{13}\text{C}$ NMR Spectrum of <b>4a</b>                   | 22   |
| 20    | Figure S20. $^1\text{H}$ NMR Spectrum of <b>4b</b>                      | 23   |
| 21    | Figure S21. $^{13}\text{C}$ NMR Spectrum of <b>4b</b>                   | 24   |
| 22    | Figure S22. $^{19}\text{F}$ NMR Spectrum of <b>4b</b>                   | 25   |

|    |                                                                         |    |
|----|-------------------------------------------------------------------------|----|
| 23 | Figure S23. $^1\text{H}$ NMR Spectrum of <b>4c</b>                      | 26 |
| 24 | Figure S24. $^{13}\text{C}$ NMR Spectrum of <b>4c</b>                   | 27 |
| 25 | Figure S25. $^1\text{H}$ NMR Spectrum of <b>4d</b>                      | 28 |
| 26 | Figure S26. $^{13}\text{C}$ NMR Spectrum of <b>4d</b>                   | 29 |
| 27 | Figure S27. $^1\text{H}$ NMR Spectrum of <b>4e</b>                      | 30 |
| 28 | Figure S28. $^{13}\text{C}$ NMR Spectrum of <b>4e</b>                   | 31 |
| 29 | Figure S29. $^1\text{H}$ NMR Spectrum of <b>4f</b>                      | 32 |
| 30 | Figure S30. $^{13}\text{C}$ NMR Spectrum of <b>4f</b>                   | 33 |
| 31 | Figure S31. $^1\text{H}$ NMR Spectrum of <b>4g</b>                      | 34 |
| 32 | Figure S32. $^{13}\text{C}$ NMR Spectrum of <b>4g</b>                   | 35 |
| 33 | Figure S33. $^1\text{H}$ NMR Spectrum of <b>6a</b>                      | 36 |
| 34 | Figure S34. $^{13}\text{C}$ NMR Spectrum of <b>6a</b>                   | 37 |
| 35 | Figure S35. $^1\text{H}$ NMR Spectrum of <b>6b</b>                      | 38 |
| 36 | Figure S36. $^{13}\text{C}$ NMR Spectrum of <b>6b</b>                   | 39 |
| 37 | Figure S37. $^1\text{H}$ NMR Spectrum of <b>6c</b>                      | 40 |
| 38 | Figure S38. $^{13}\text{C}$ NMR Spectrum of <b>6c</b>                   | 41 |
| 39 | Figure S39. $^{13}\text{C}$ -APT NMR Spectrum of <b>6c</b>              | 42 |
| 40 | Figure S40. $^1\text{H}$ - $^1\text{H}$ NOESY NMR Spectrum of <b>6c</b> | 43 |
| 41 | Figure S41. $^1\text{H}$ NMR Spectrum of <b>6d</b>                      | 44 |
| 42 | Figure S42. $^{13}\text{C}$ NMR Spectrum of <b>6d</b>                   | 45 |
| 43 | Figure S43. $^1\text{H}$ - $^1\text{H}$ COSY NMR Spectrum of <b>6d</b>  | 46 |
| 44 | Figure S44. $^1\text{H}$ NMR Spectrum of <b>6e</b>                      | 47 |
| 45 | Figure S45. $^{13}\text{C}$ NMR Spectrum of <b>6e</b>                   | 48 |
| 46 | Figure S46. $^{19}\text{F}$ NMR Spectrum of <b>6e</b>                   | 49 |
| 47 | Figure S47. $^1\text{H}$ NMR Spectrum of <b>6f</b>                      | 50 |
| 48 | Figure S48. $^{13}\text{C}$ NMR Spectrum of <b>6f</b>                   | 51 |
| 49 | Figure S49. $^1\text{H}$ NMR Spectrum of <b>6g</b>                      | 52 |
| 50 | Figure S50. $^{13}\text{C}$ NMR Spectrum of <b>6g</b>                   | 53 |
| 51 | Figure S51. $^1\text{H}$ NMR Spectrum of <b>6h</b>                      | 54 |
| 52 | Figure S52. $^{13}\text{C}$ NMR Spectrum of <b>6h</b>                   | 55 |
| 53 | Figure S53. $^1\text{H}$ NMR Spectrum of <b>6i</b>                      | 56 |
| 54 | Figure S54. $^{13}\text{C}$ NMR Spectrum of <b>6i</b>                   | 57 |

|    |                                                                 |    |
|----|-----------------------------------------------------------------|----|
| 55 | Figure S55. <sup>1</sup> H NMR Spectrum of <b>6j</b>            | 58 |
| 56 | Figure S56. <sup>13</sup> C NMR Spectrum of <b>6j</b>           | 59 |
| 57 | Figure S57. <sup>1</sup> H NMR Spectrum of <b>6k</b>            | 60 |
| 58 | Figure S58. <sup>13</sup> C NMR Spectrum of <b>6k</b>           | 61 |
| 59 | Figure S59. <sup>1</sup> H NMR Spectrum of <b>6l</b>            | 62 |
| 60 | Figure S60. <sup>13</sup> C NMR Spectrum of <b>6l</b>           | 63 |
| 61 | Figure S61. <sup>1</sup> H NMR Spectrum of <b>6m</b>            | 64 |
| 62 | Figure S62. <sup>13</sup> C NMR Spectrum of <b>6m</b>           | 65 |
| 63 | Figure S63. <sup>1</sup> H NMR Spectrum of <b>8a</b>            | 66 |
| 64 | Figure S64. <sup>13</sup> C NMR Spectrum of <b>8a</b>           | 67 |
| 65 | Figure S65. <sup>1</sup> H NMR Spectrum of <b>8b</b>            | 68 |
| 66 | Figure S66. <sup>13</sup> C NMR Spectrum of <b>8b</b>           | 69 |
| 67 | Figure S67. <sup>1</sup> H NMR Spectrum of <b>8c</b>            | 70 |
| 68 | Figure S68. <sup>13</sup> C NMR Spectrum of <b>8c</b>           | 71 |
| 69 | Figure S69. <sup>1</sup> H NMR Spectrum of <b>8d</b>            | 72 |
| 70 | Figure S70. <sup>13</sup> C NMR Spectrum of <b>8d</b>           | 73 |
| 71 | Figure S71. <sup>1</sup> H NMR Spectrum of <b>8e</b>            | 74 |
| 72 | Figure S72. <sup>13</sup> C NMR Spectrum of <b>8e</b>           | 75 |
| 73 | Figure S73. <sup>1</sup> H NMR Spectrum of <b>8f</b>            | 76 |
| 74 | Figure S74. <sup>13</sup> C NMR Spectrum of <b>8f</b>           | 77 |
| 75 | Figure S75. <sup>1</sup> H NMR Spectrum of <b>10a</b>           | 78 |
| 76 | Figure S76. <sup>13</sup> C NMR Spectrum of <b>10a</b>          | 79 |
| 77 | Figure S77. <sup>1</sup> H NMR Spectrum of <b>10b</b>           | 80 |
| 78 | Figure S78. <sup>1</sup> H NMR Spectrum of <b>10b</b> at 323 k  | 81 |
| 79 | Figure S79. <sup>1</sup> H NMR Spectrum of <b>10b</b> at 333 k  | 82 |
| 80 | Figure S80. <sup>13</sup> C NMR Spectrum of <b>10b</b>          | 83 |
| 81 | Figure S81. <sup>13</sup> C NMR Spectrum of <b>10b</b> at 333 k | 84 |
| 82 | Figure S82. <sup>1</sup> H NMR Spectrum of <b>10c</b>           | 85 |
| 83 | Figure S83. <sup>13</sup> C NMR Spectrum of <b>10c</b>          | 86 |

```

MBHDMAD-1
exp10  PROTON
      SAMPLE
date   Nov 21 2006  temp      not used
solvent COCL3      gain      not used
file   /export/home/~ spin      not used
Inn3/2005/Nov06/21- hst      0.008
st/MBH-DMAD-1.fid  pw90     8.500
ACQUISITION a1fa      -7.925
sw      6006.0      FLAGS
at      1.989      f1      n
np      23888      in      n
fb      not used   dp      y
bs      4          hs      nn
d1      1.000      PROCESSING
nt      400       lb      8.10
ct      48        fn      not used
      TRANSMITTER  DISPLAY
tn      H1        sp      -37.7
sfrq    399.883   wp      4824.9
tof     200.0     rfl     3659.0
tpwr    55        rfp     2903.1
pw      4.250     rp      -59.9
      DECOUPLER   lp      29.9
dn      C13      PLOT
dof     0         wc      250
ds      nnn      SC      0
dsa     c        vs     99
dpwr    51       th     30
dwt     17100    nm      ph

```

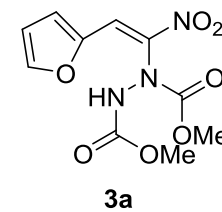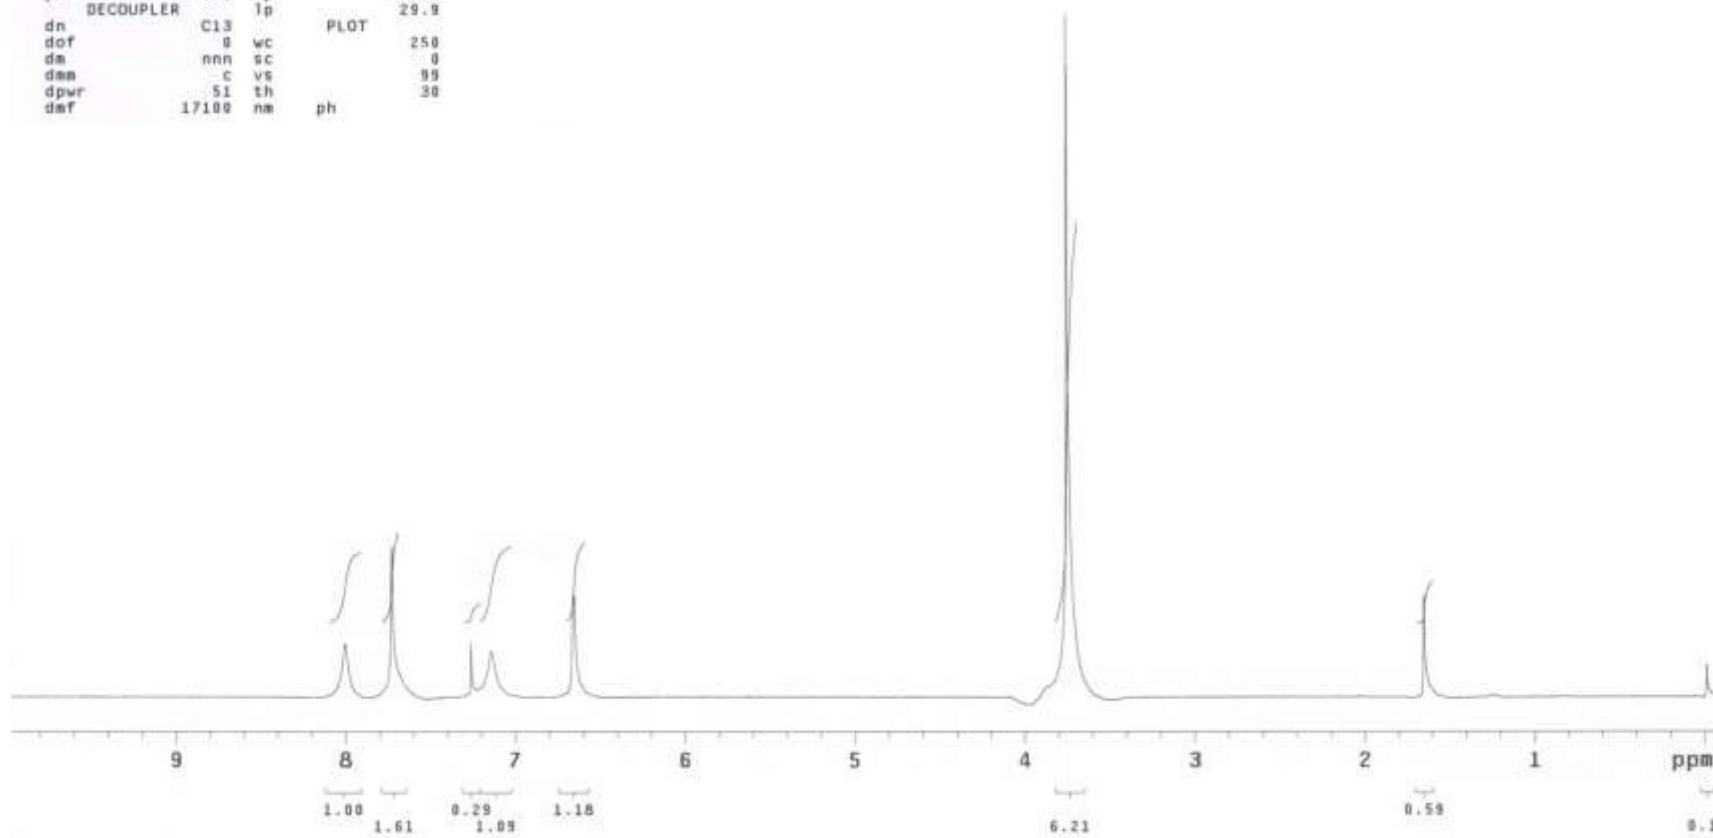

Figure S1.  $^1\text{H}$  NMR Spectrum of **3a**

3BH-DMAD-1-C13

exp16 CARBON

```
SAMPLE          SPECIAL
date Dec 1 2006 temp      not used
solvent CDCl3 gain      34
file exp spin      not used
ACQUISITION     hst      0.008
sw 25125.6 pw90     14.000
at 1.199 alfa     20.000
np 60270
fb 13800
bs 4
dl 1.000 dp
nt 50000 hs
ct 156
TRANSMITTER     lb      2.00
tn C13 fn      not used
sfrq 100.561
tof 1554.3
tpwr 56 wp      22153.5
pw 7.000 rfl     9262.9
DECOUPLER      rfp     7742.3
dn HI rp      137.9
dof 0 lp     -336.9
dm yyy
dmw w
dpwr 41 sc
def 11900 vs     51
th
nm ph     2
```

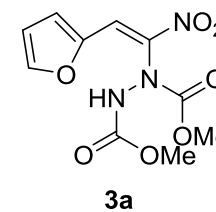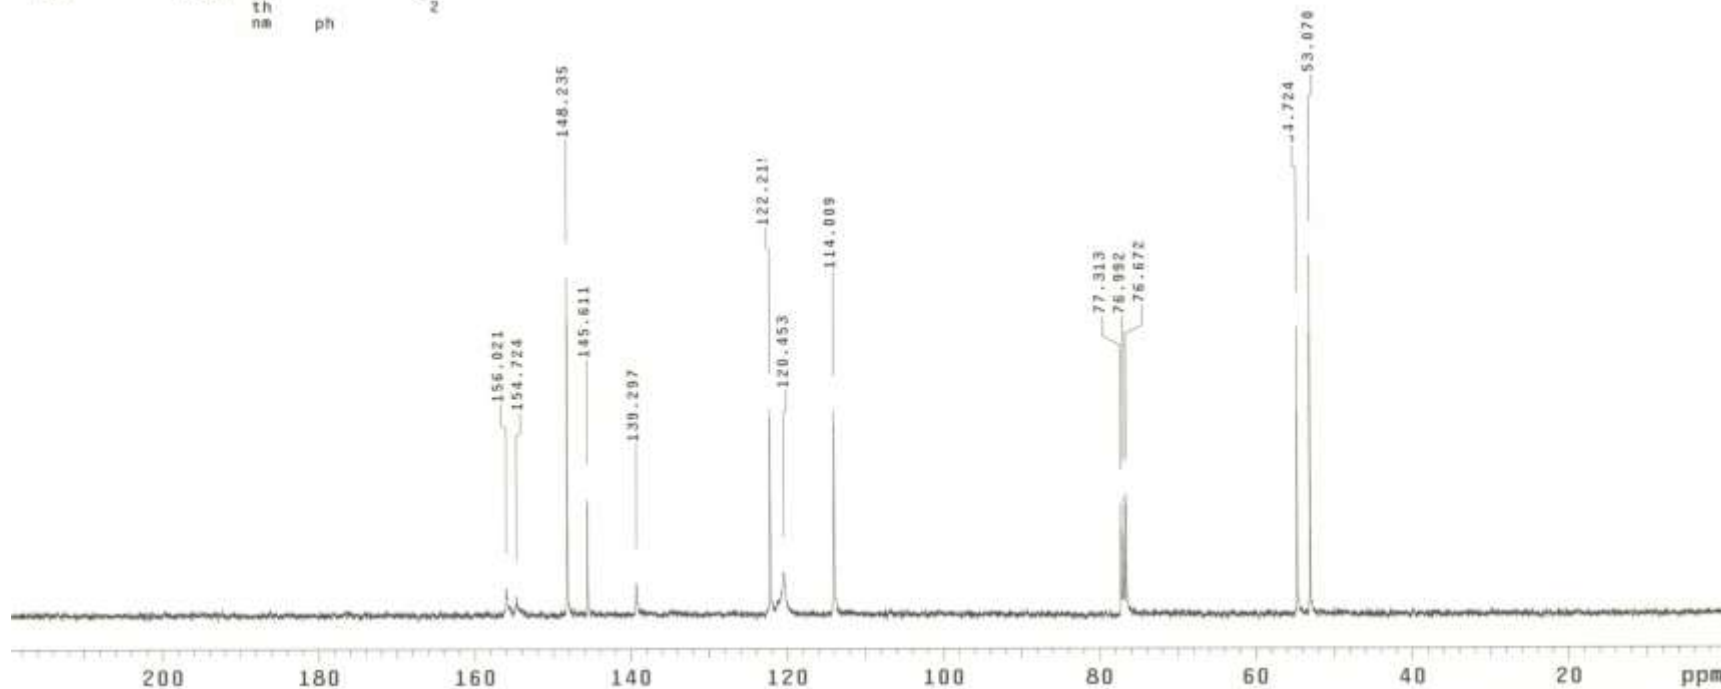

Figure S2. <sup>13</sup>C NMR Spectrum of **3a**

Current Data Parameters  
NAME INN-MVD-CINNAMYL DIAD  
EXFNO 1  
PROCNO 1

F2 - Acquisition Parameters  
Date\_ 20150327  
Time\_ 12.36  
INSTRUM spect  
PROBHD 5 mm PABBO BB/  
PULPROG zg30  
TD 65536  
SOLVENT CDCl3  
NS 12  
DS 2  
SWH 10000.000 Hz  
FIDRES 0.152588 Hz  
AQ 3.2767899 sec  
RG 30.72  
DW 50.000 usec  
DE 6.50 usec  
TE 299.8 K  
D1 1.00000000 sec  
TD0 1

----- CHANNEL f1 -----  
SFO1 500.1330885 MHz  
NUC1 1H  
P1 13.00 usec  
PLW1 13.00000000 W

F2 - Processing parameters  
SI 65536  
SF 500.1300125 MHz  
WDW EM  
SSB 0  
LB 0.30 Hz  
GB 0  
PC 1.00

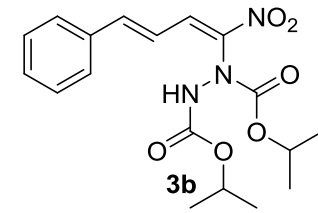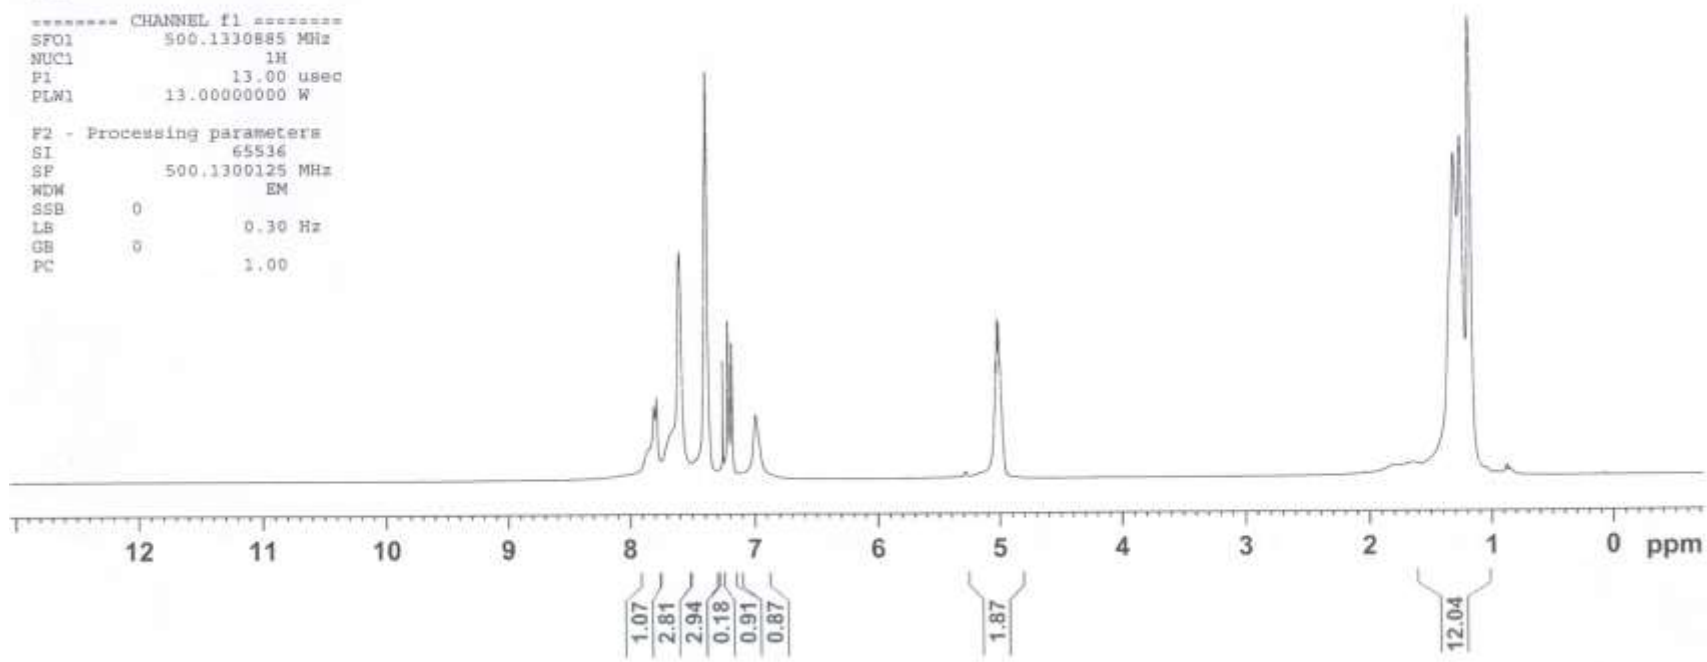

Figure S3. <sup>1</sup>H NMR Spectrum of **3b**

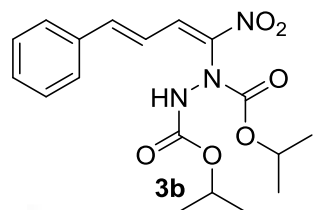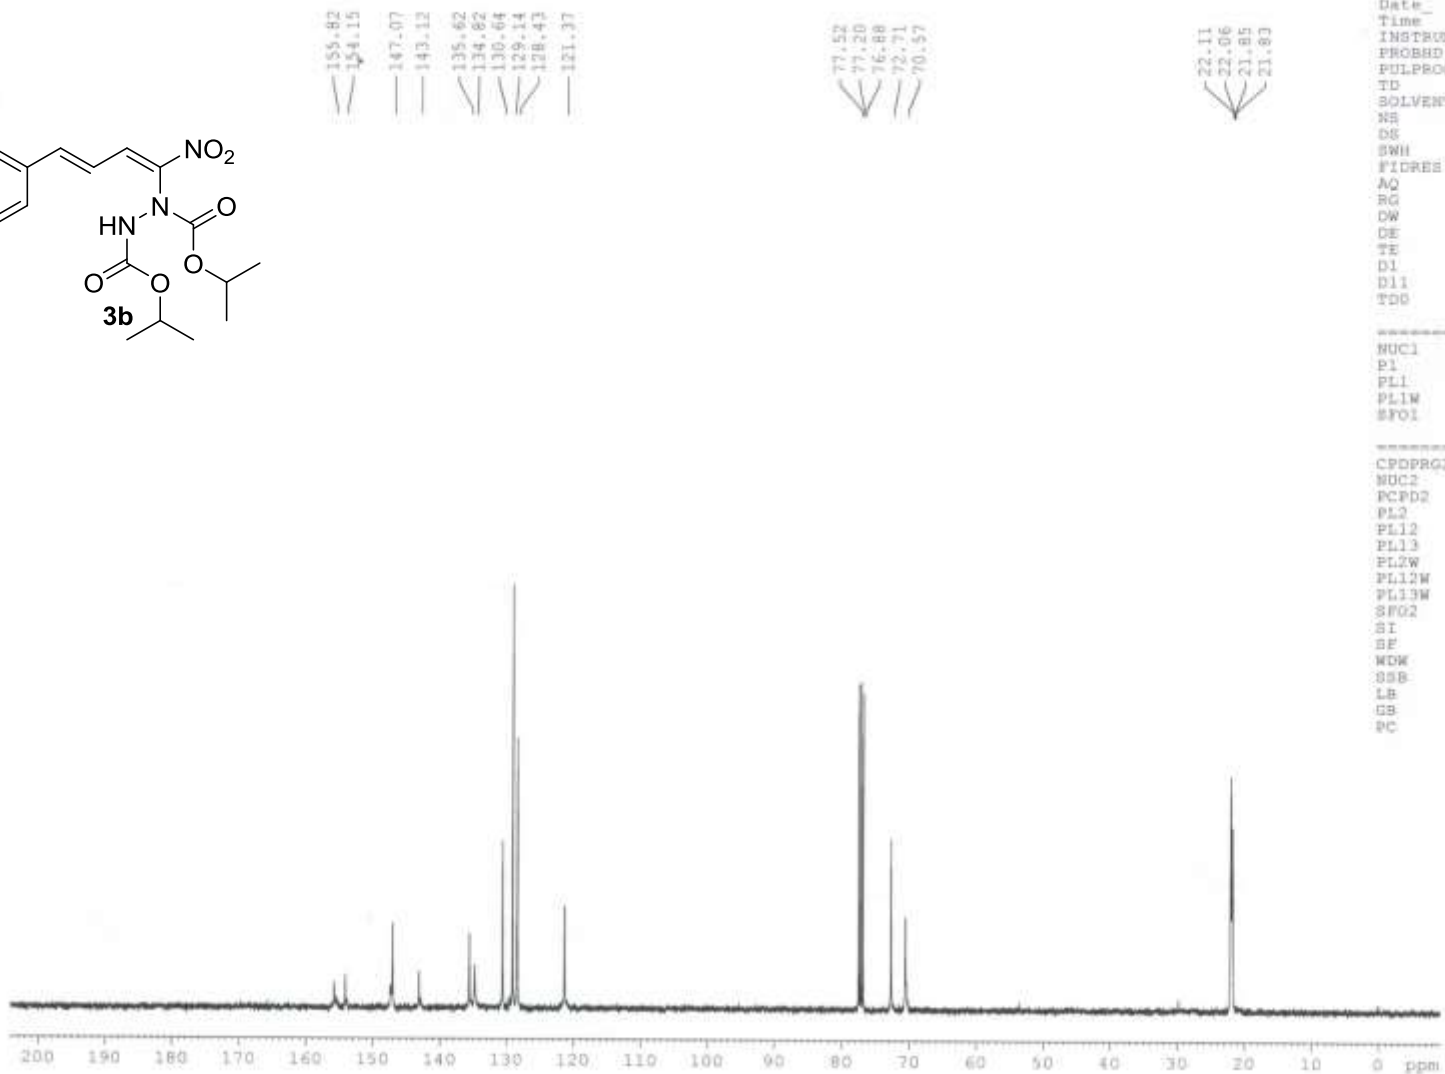

```

NAME      INN-JYP-84-C13
EXPNO     27
PROCNO    1
Date_     20110218
Time      16.47
INSTRUM   spect
PROBHD    5 mm PABBO BB-
PULPROG   zgpg30
TD         65536
SOLVENT   CDCl3
NS         061
DS         1
SWH        27777.777 Hz
FIDRES     0.423855 Hz
AQ         1.1796980 sec
RG         912
DW         18.000 usec
DE         6.50 usec
TE         294.7 K
D1         1.00000000 sec
D11        0.03000000 sec
TDD        1
  
```

```

----- CHANNEL f1 -----
NUC1       13C
P1         8.75 usec
PL1        -2.00 dB
PL1W       56.53121948 W
SFO1       100.6240376 MHz
  
```

```

----- CHANNEL f2 -----
CPDPRG2   waltz16
NUC2       1H
PCPD2     80.00 usec
PL2        -1.00 dB
PL12       14.50 dB
PL13       14.50 dB
PL12W     10.56200695 W
PL12W     0.29767781 W
PL13W     0.29767781 W
SFO2       400.1316005 MHz
SI         32768
SF         100.6127581 MHz
WDW        EM
SSB        0
LB         1.00 Hz
GB         0
PC         1.00
  
```

Figure S4.  $^{13}\text{C}$  NMR Spectrum of **3b**

```

Current Data Parameters
NAME      INN-RRK-33-1H
EXPNO     11
PROCNO    1

F2 - Acquisition Parameters
Date_     20131004
Time      22.13
INSTRUM   spect
PROBHD    5 mm PABBO BB/
PULPROG   zg30
TD         65536
SOLVENT   CDCl3
NS         14
DS         2
SWH        10000.000 Hz
FIDRES     0.152588 Hz
AQ         3.2767999 sec
RG         30.72
DW         50.000 usec
DE         6.50 usec
TE         296.9 K
D1         1.00000000 sec
TD0        1

----- CHANNEL f1 -----
SFO1      500.1330885 MHz
NUC1       1H
P1         13.00 usec
PLW1       13.00000000 W

F2 - Processing parameters
SI         65536
SF         500.1300000 MHz
WDW        EM
SSB        0
LB         0.30 Hz
GB         0
PC         1.00

```

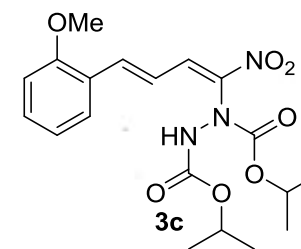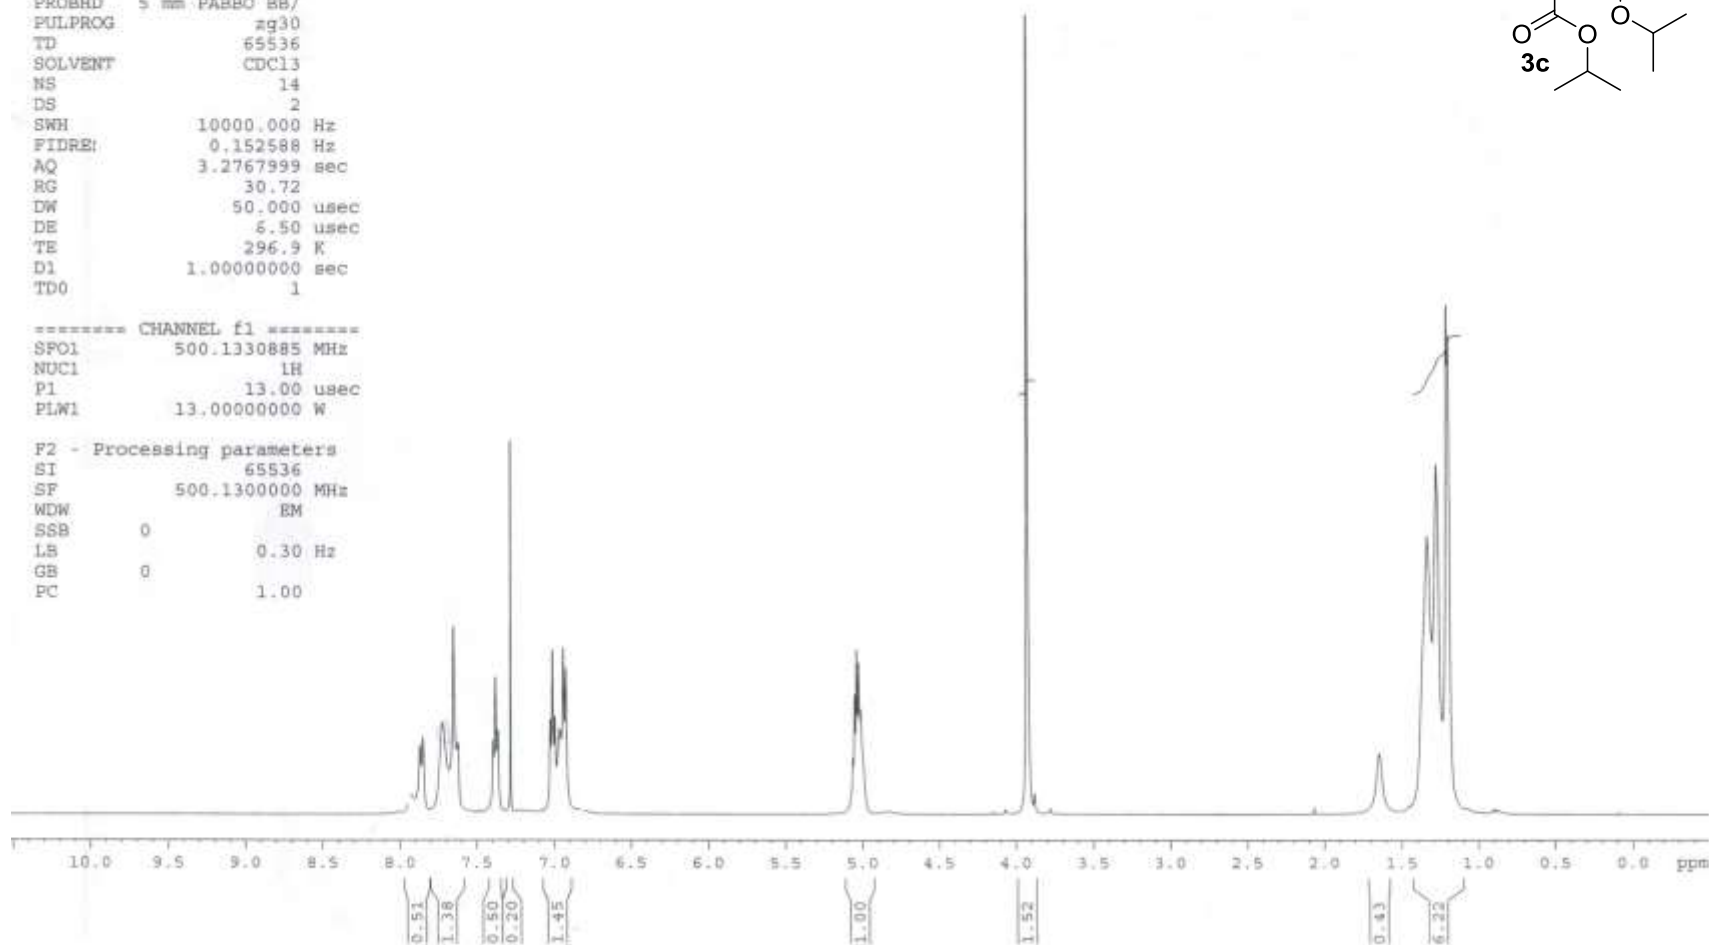

Figure S5. <sup>1</sup>H NMR Spectrum of **3c**



NAME INN-JYP-103-13C  
 EXPNO 8  
 PROCNO 1  
 Date\_ 20110404  
 Time\_ 10.47  
 INSTRUM spect  
 PROBHD 5 mm rABBO BB-  
 PULPROG zgpg30  
 TD 65536  
 SOLVENT CDCl3  
 NS 112  
 DS 4  
 SWH 24038.461 Hz  
 FIDRES 0.366798 Hz  
 AQ 1.3631988 sec  
 RG 2050  
 DW 20.800 usec  
 DE 6.50 usec  
 TE 300.0 K  
 D1 2.00000000 sec  
 D11 0.03000000 sec  
 TDO 1

----- CHANNEL f1 -----  
 NUC1 13C  
 P1 8.75 usec  
 PL1 -2.00 dB  
 PL1W 56.53121948 W  
 SFO1 100.6228298 MHz

----- CHANNEL f2 -----  
 CPDPRG2 waltz16  
 NUC2 1H  
 PCPD2 80.00 usec  
 PL2 -1.00 dB  
 PL12 14.50 dB  
 PL13 14.50 dB  
 PL2W 10.56200695 W  
 PL12W 0.29767781 W  
 PL13W 0.29767781 W  
 SFO2 400.1316005 MHz  
 SI 32768  
 SF 100.6127566 MHz  
 WDW EM  
 SSB 0  
 LB 1.00 Hz  
 GB 0  
 PC 1.40

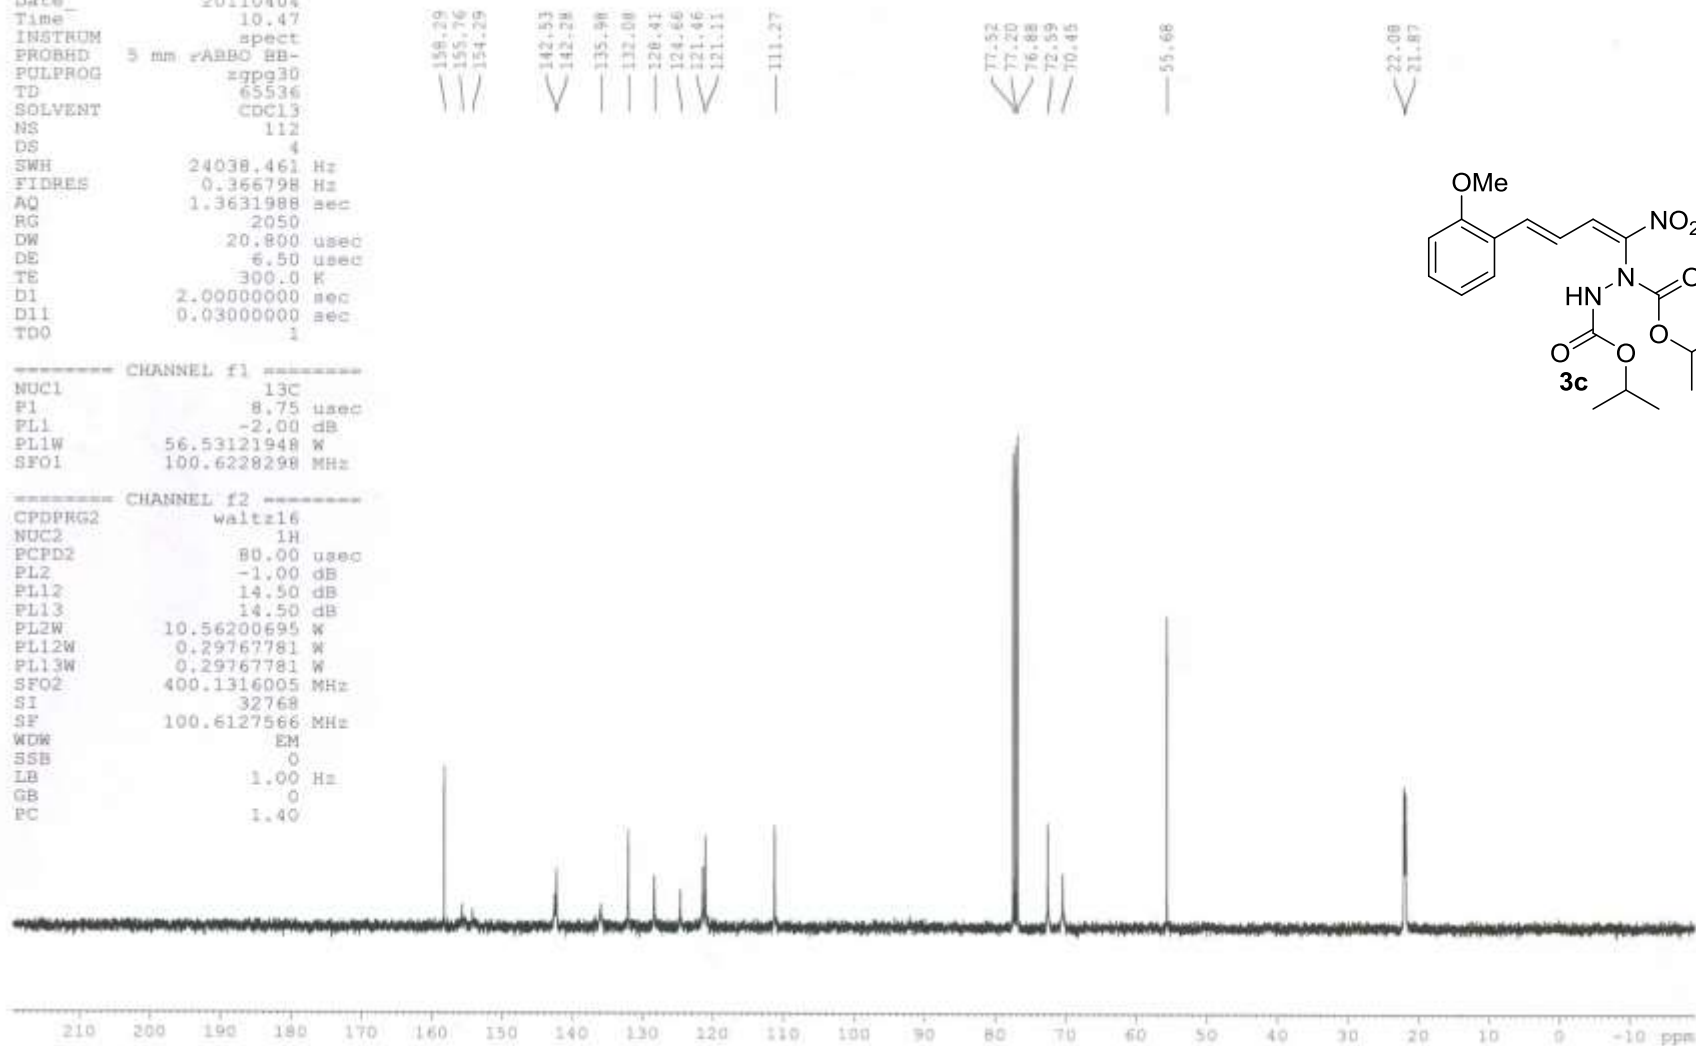

Figure S6. <sup>13</sup>C NMR Spectrum of **3c**

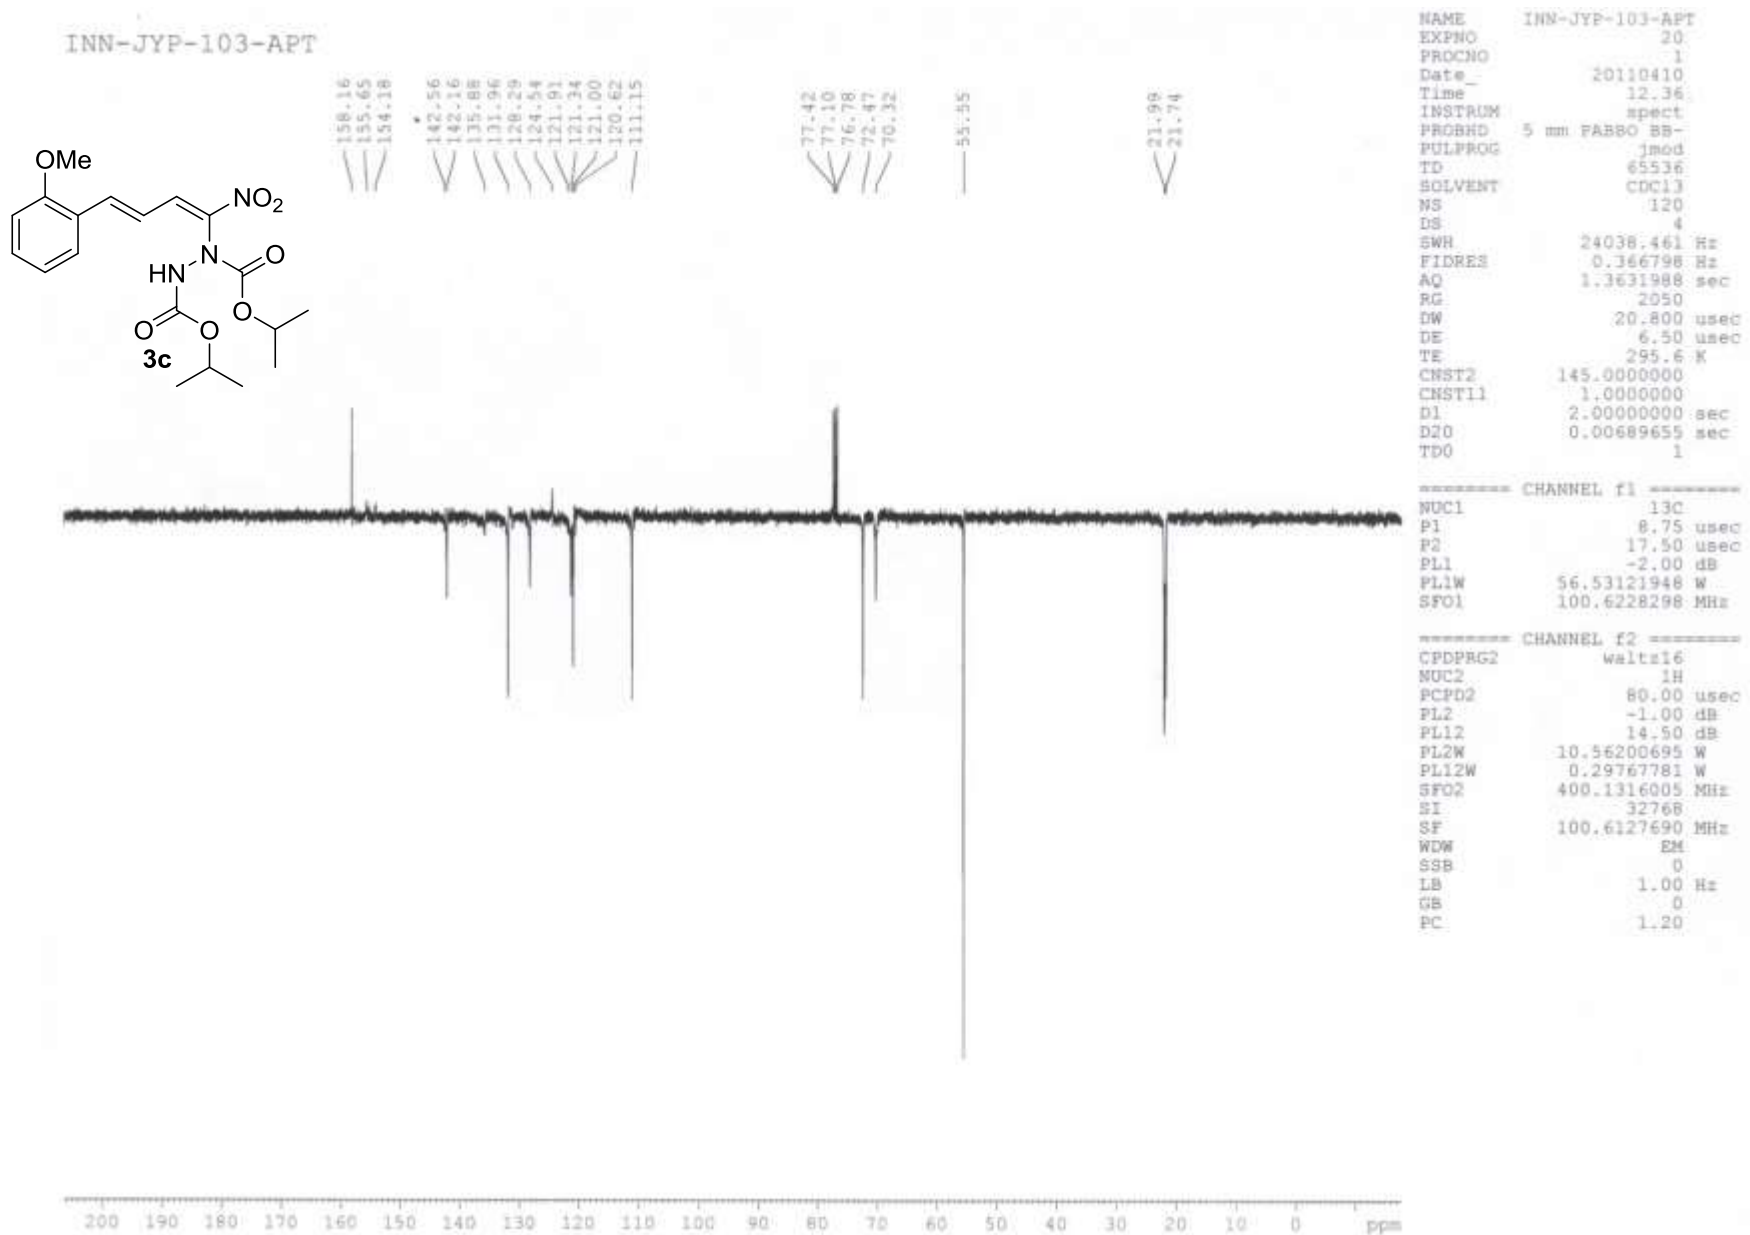

Figure S7. <sup>13</sup>C-APT Spectrum of **3c**

IMN-CD-23

Data Collected on: quanta-mercury300  
Archive directory: /export/home/vnmr1/vnmrsys/data  
Sample directory: IMN-CD-23\_2008-04-11  
File: gCOSY\_01

Pulse Sequence: gCOSY

Solvent: CDCl3

Relax. delay 1.000 sec  
Acq. time 0.150 sec  
Width 3273.3 Hz  
2D Width 3273.3 Hz  
2 repetitions  
256 increments  
OBSERVE H1, 299.9475008 MHz  
DATA PROCESSING  
Sq. sine bell 0.075 sec  
F1 DATA PROCESSING  
Sq. sine bell 0.078 sec  
FT size 2048 x 2048  
Total time 12 min

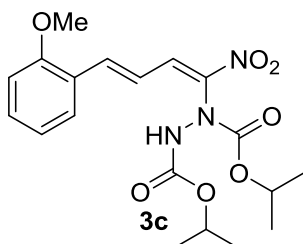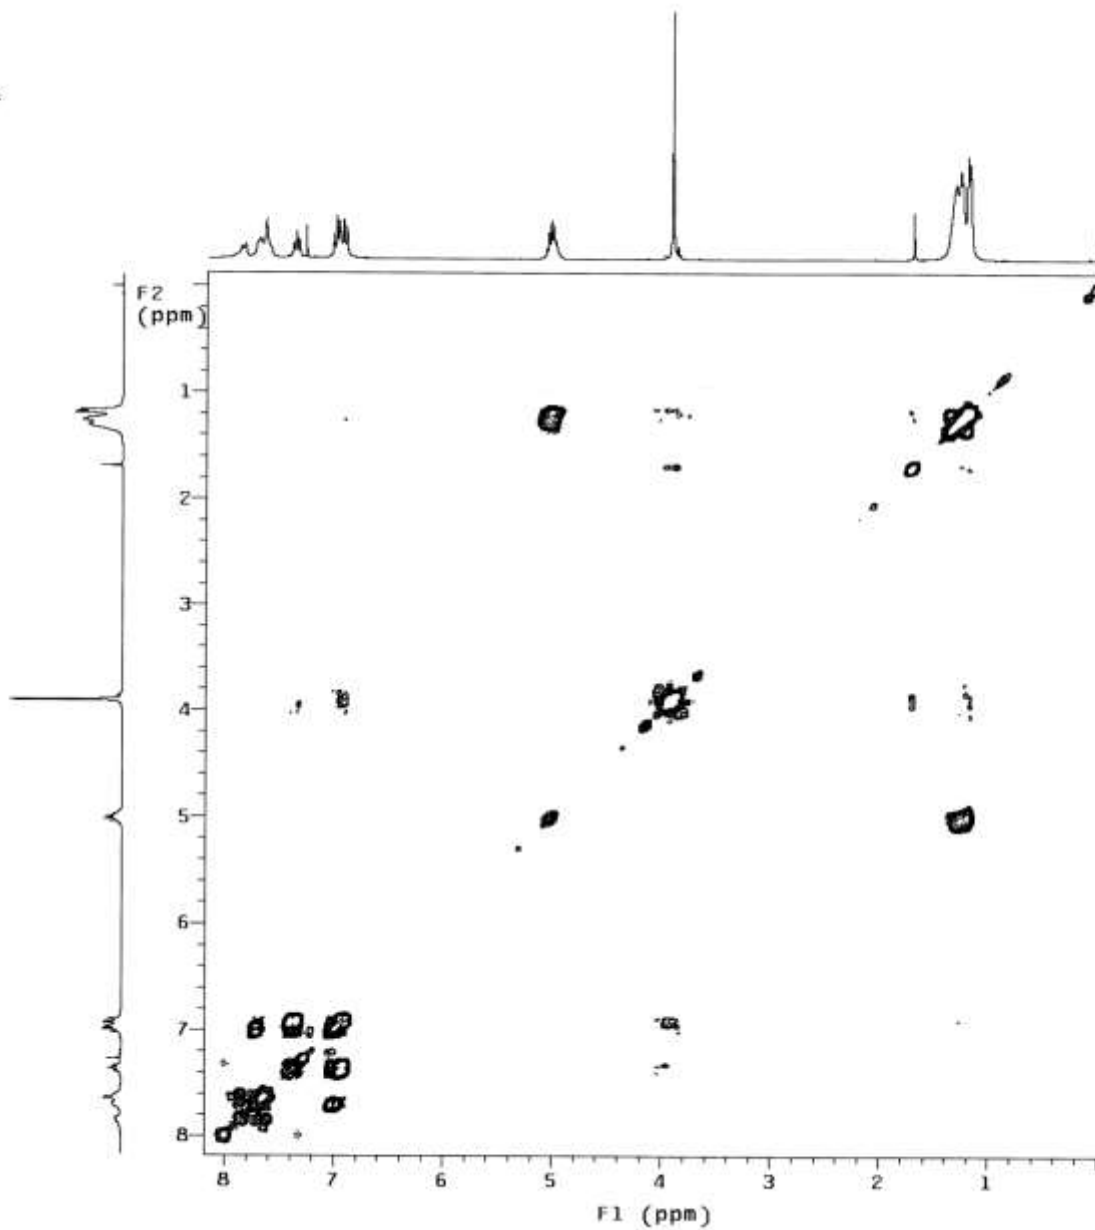

Figure S8.  $^1\text{H}$ - $^1\text{H}$ -COSY Spectrum of **3c**

3Mn-CD-23-NOESY  
Data Collected on: Quanta-mercuryH1freq  
Archive directory: /export/home/vmr1/vmr5ys/data  
Sample directory:  
File: 3Mn-1D-23-NOESY  
Pulse Sequence: NOESY

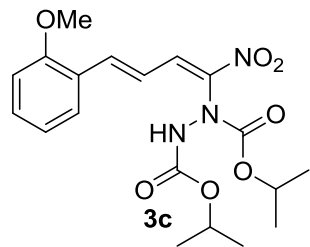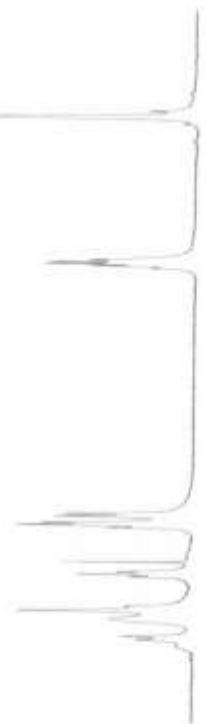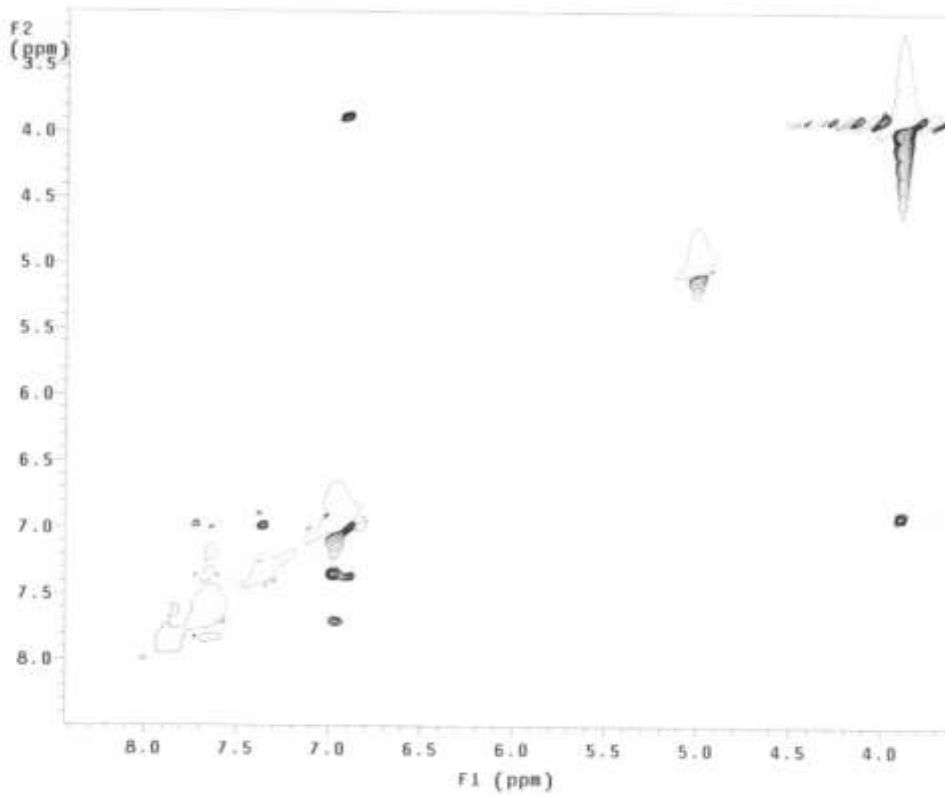

Figure S9.  $^1\text{H}$ - $^1\text{H}$ -NOESY Spectrum of **3c** Figure S10.  $^1\text{H}$  NMR Spectrum of **3d**

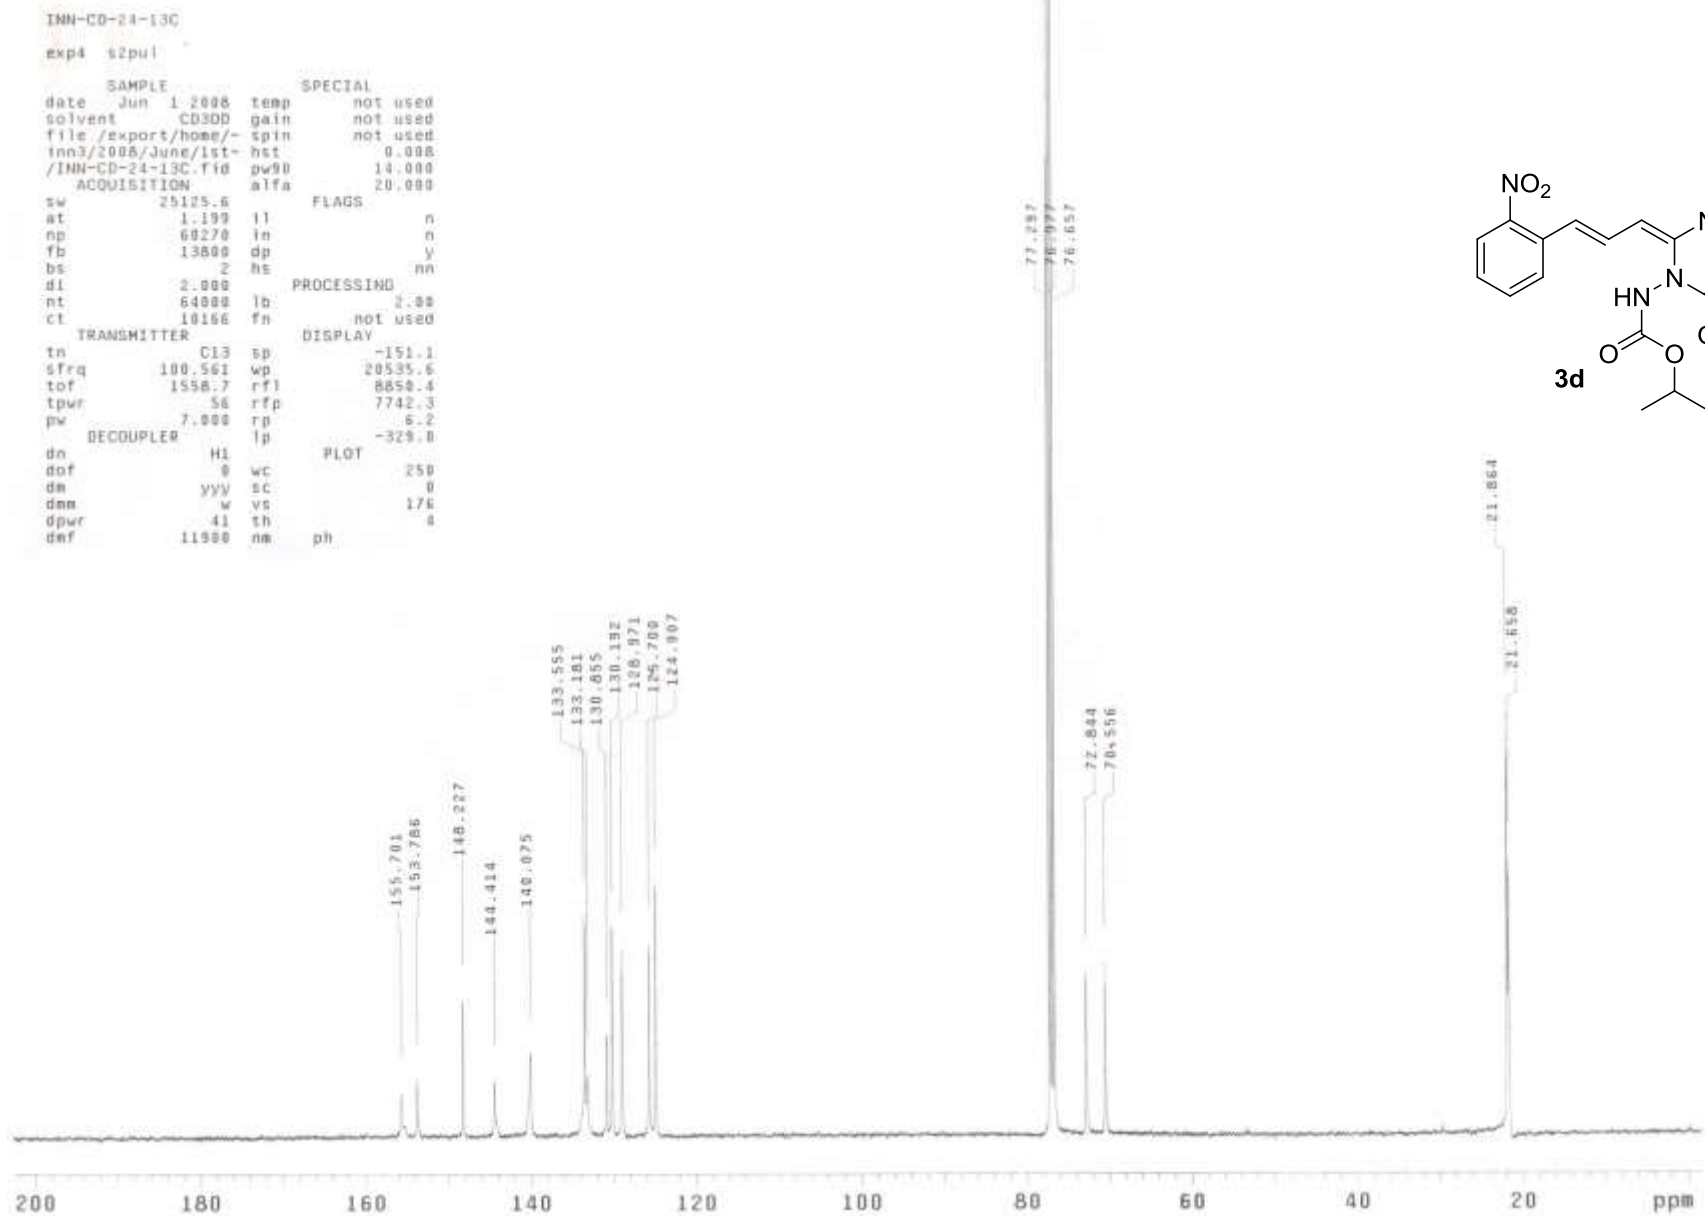

Figure S11.  $^{13}\text{C}$  NMR Spectrum of **3d**

Current Data Parameters  
NAME INN-MVD-CYCLOHEXANEDIAD-H1  
EXPNO 1  
PROCNO 1

F2 - Acquisition Parameters  
Date\_ 20150331  
Time\_ 0.38  
INSTRUM spect  
PROBHD 5 mm PABBO BB/  
PULPROG zg30  
TD 65536  
SOLVENT CDC13  
NS 50  
DS 2  
SWH 10000.000 Hz  
FIDRES 0.152588 Hz  
AQ 3.2767999 sec  
RG 30.72  
DW 50.000 usec  
DE 6.50 usec  
TE 293.9 K  
D1 1.00000000 sec  
TD0 1

----- CHANNEL f1 -----  
SFO1 500.1330885 MHz  
NUC1 1H  
P1 13.00 usec  
PLW1 13.00000000 W

F2 - Processing parameters  
SI 65536  
SF 500.1300118 MHz  
WDW EM  
SSB 0  
LB 0.30 Hz  
GB 0  
PC 1.00

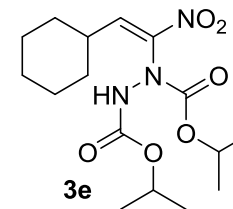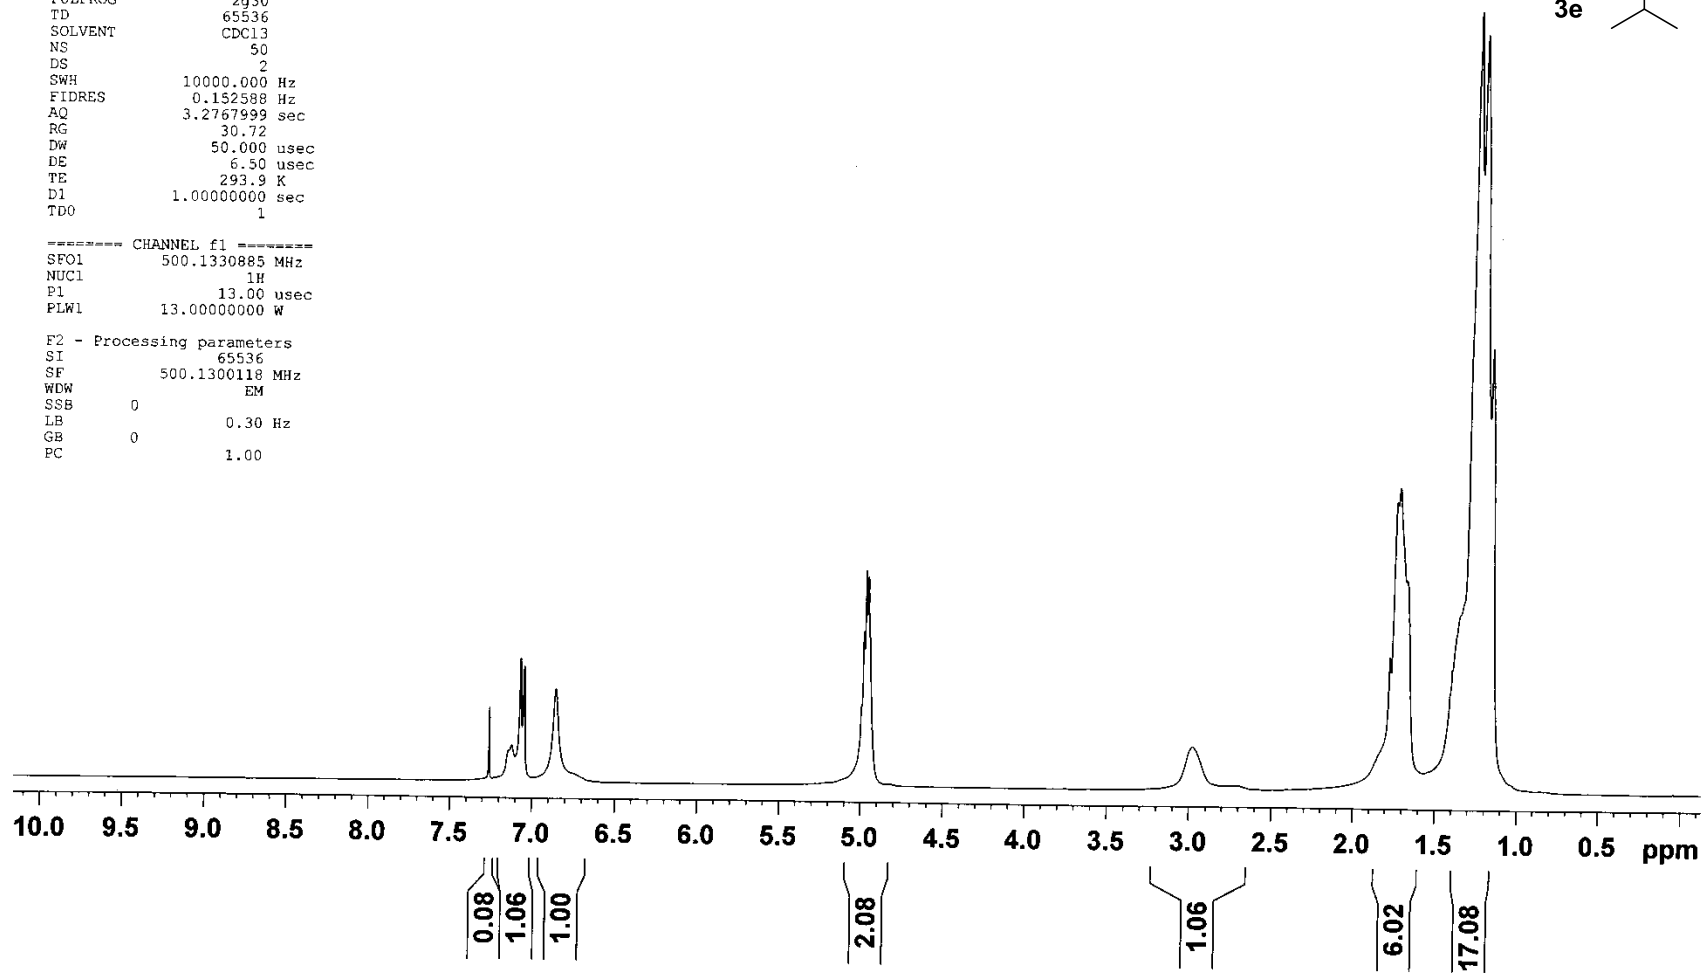

Figure S12. <sup>1</sup>H NMR Spectrum of 3e

```

NAME      INN-JYP-89-13C
EXPNO     19
PROCNO    1
Date_     20110402
Time      13.27
INSTRUM   spect
PROBHD    5 mm PABBO BB-
PULPROG   zgpg30
TD         65536
SOLVENT   CDCl3
NS         104
DS         4
SWH        26041.666 Hz
FIDRES     0.397364 Hz
AQ         1.2583412 sec
RG         2050
DW         19.200 usec
DE         6.50 usec
TE         295.5 K
DI         1.00000000 sec
DI1        0.03000000 sec
TDO        1

```

```

----- CHANNEL f1 -----
NUC1       13C
P1         8.75 usec
PL1        -2.00 dB
PL1W       56.53121948 W
SFO1       100.6238364 MHz

```

```

----- CHANNEL f2 -----
CPDPRG2    waltz16
NUC2        1H
PCPD2       80.00 usec
PL2         -1.00 dB
PL12        14.50 dB
PL13        14.50 dB
PL2W        10.56200695 W
PL12W       0.29767781 W
PL13W       0.29767781 W
SFO2       400.1316005 MHz
SI          32768
SF         100.6127564 MHz
WDW         EM
SSB         0
LB          1.00 Hz
GB          0
PC          1.40

```

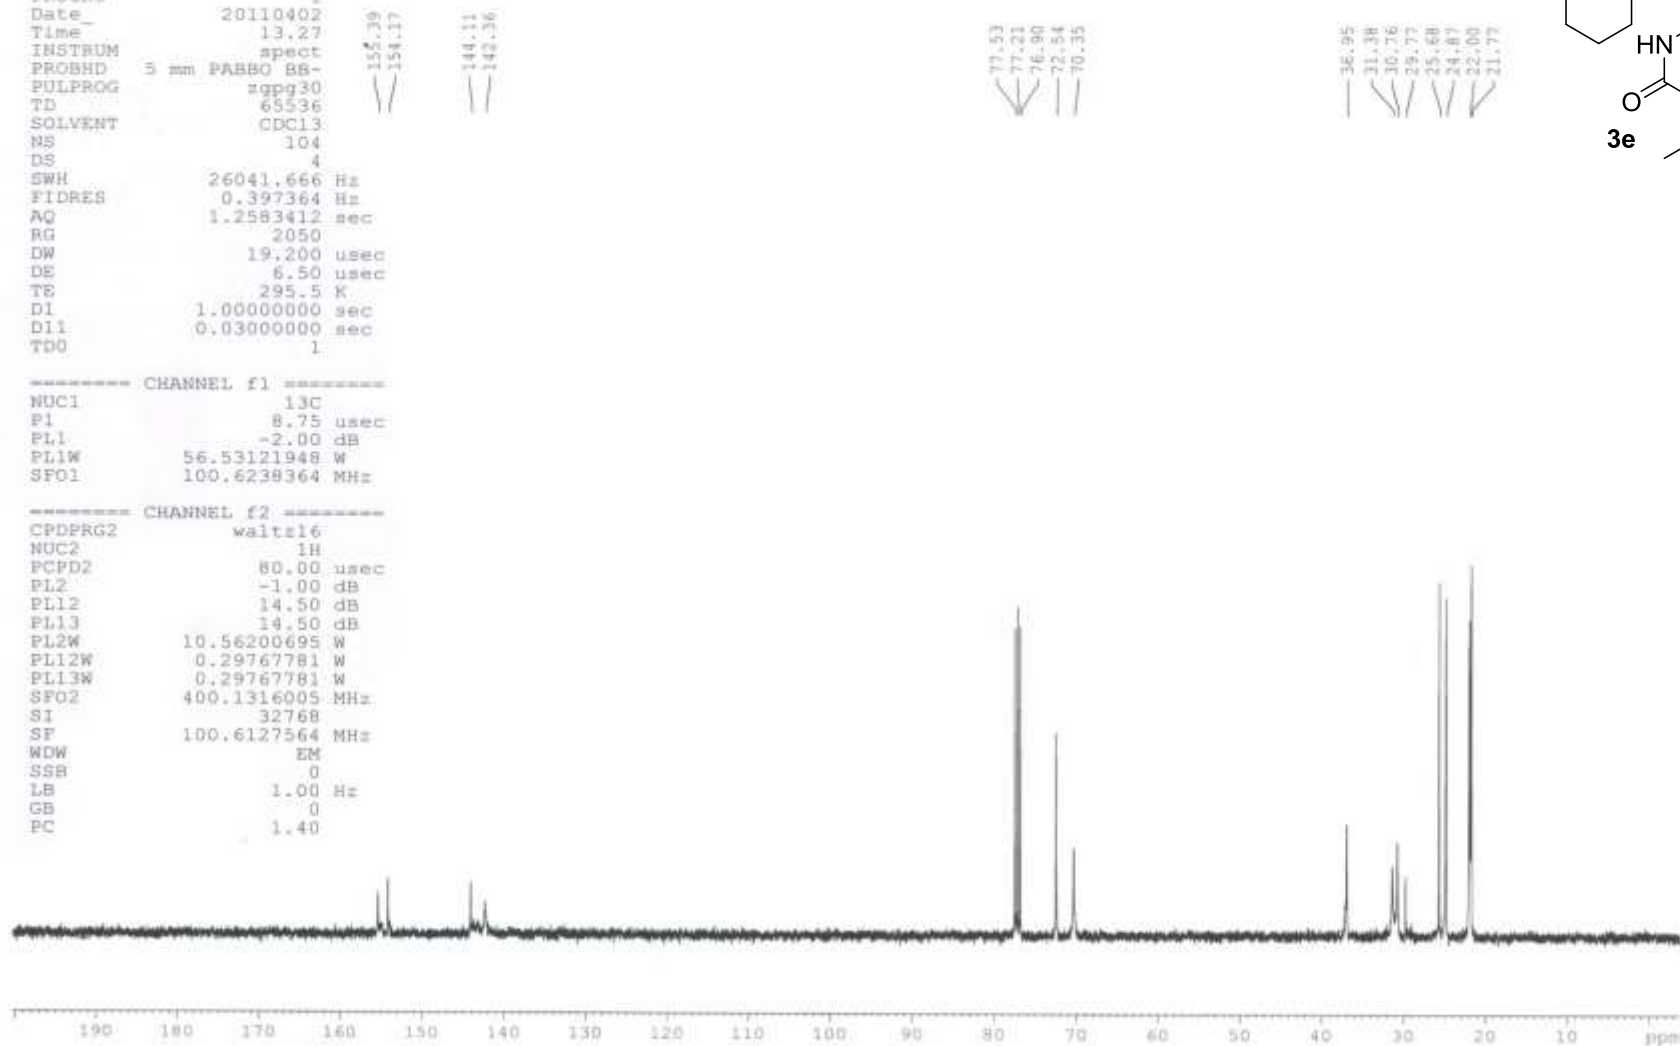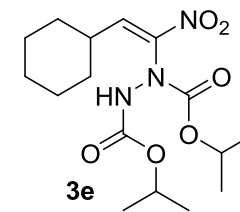

Figure S13.  $^{13}\text{C}$  NMR Spectrum of **3e**

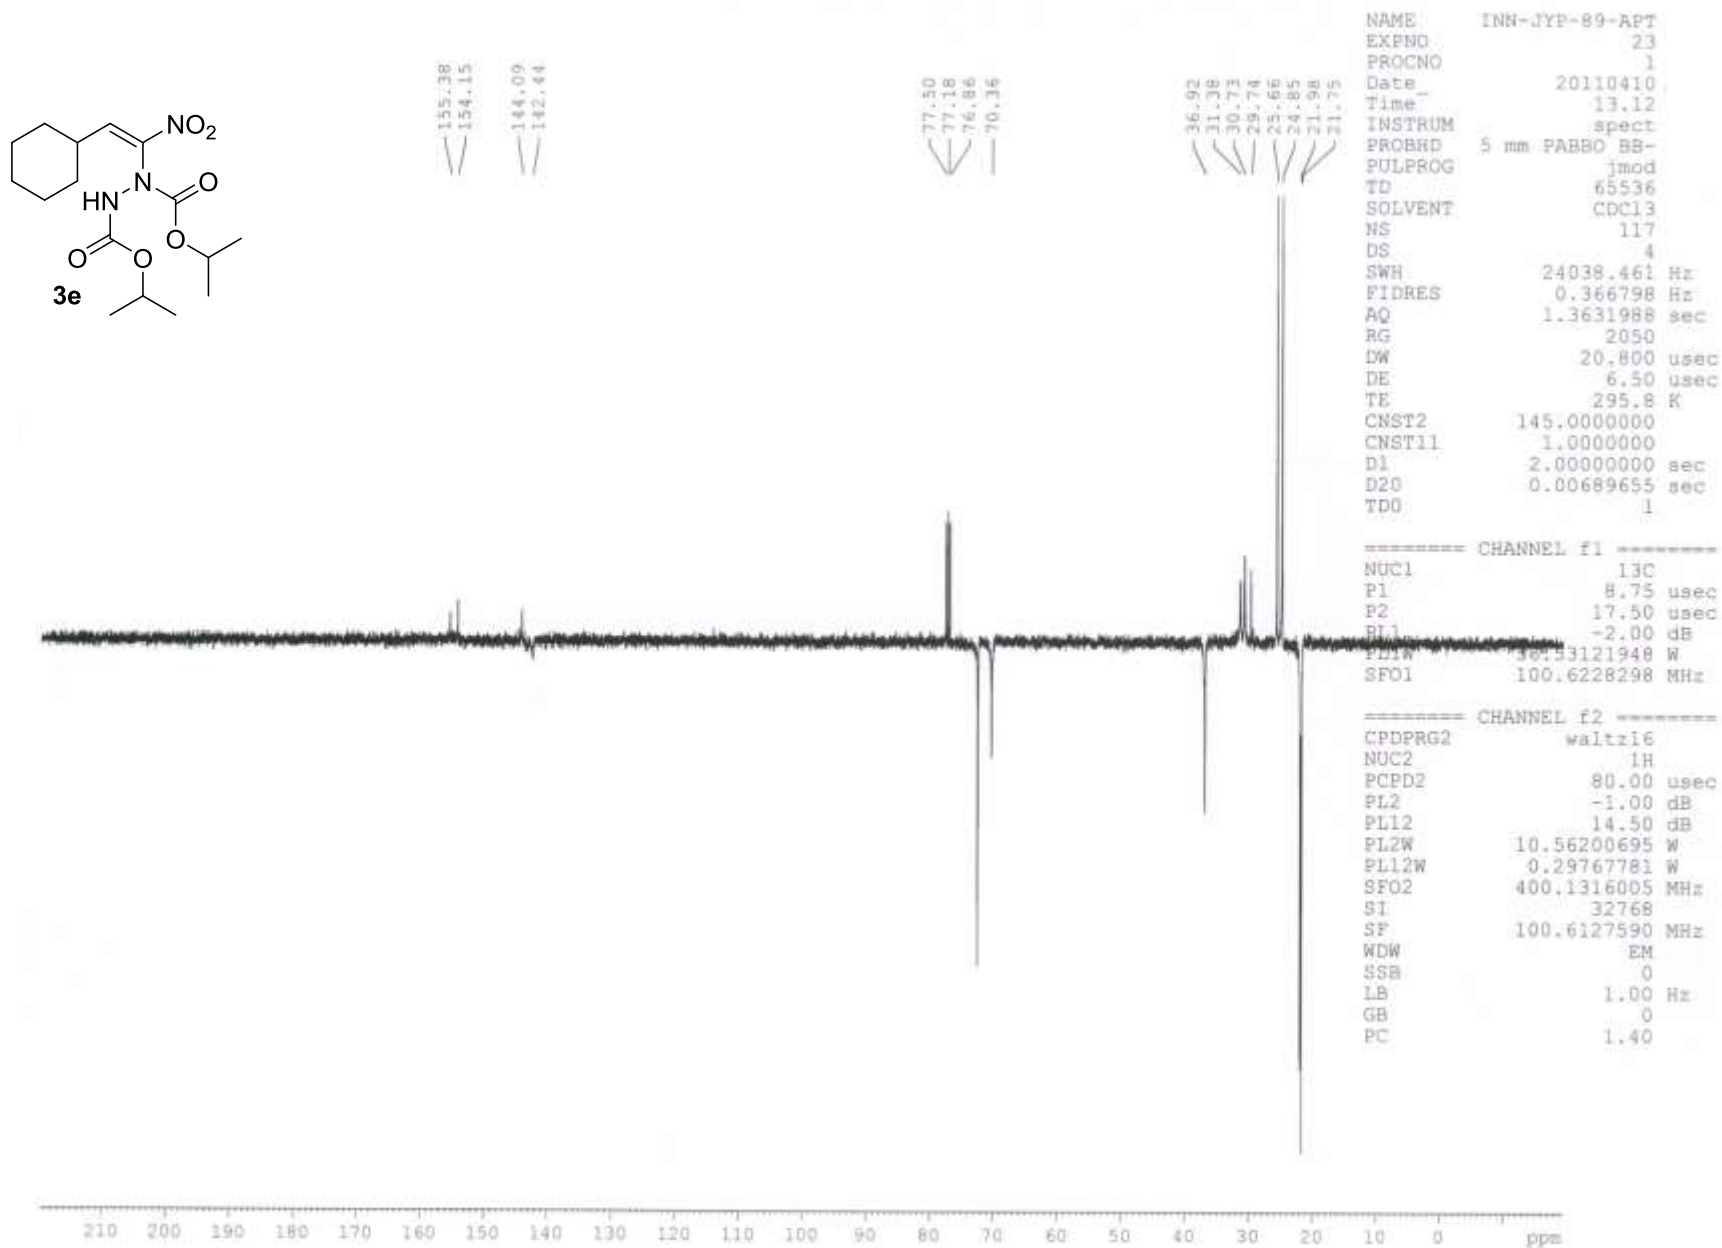

Figure S14.  $^{13}\text{C}$ -APT Spectrum of **3e**



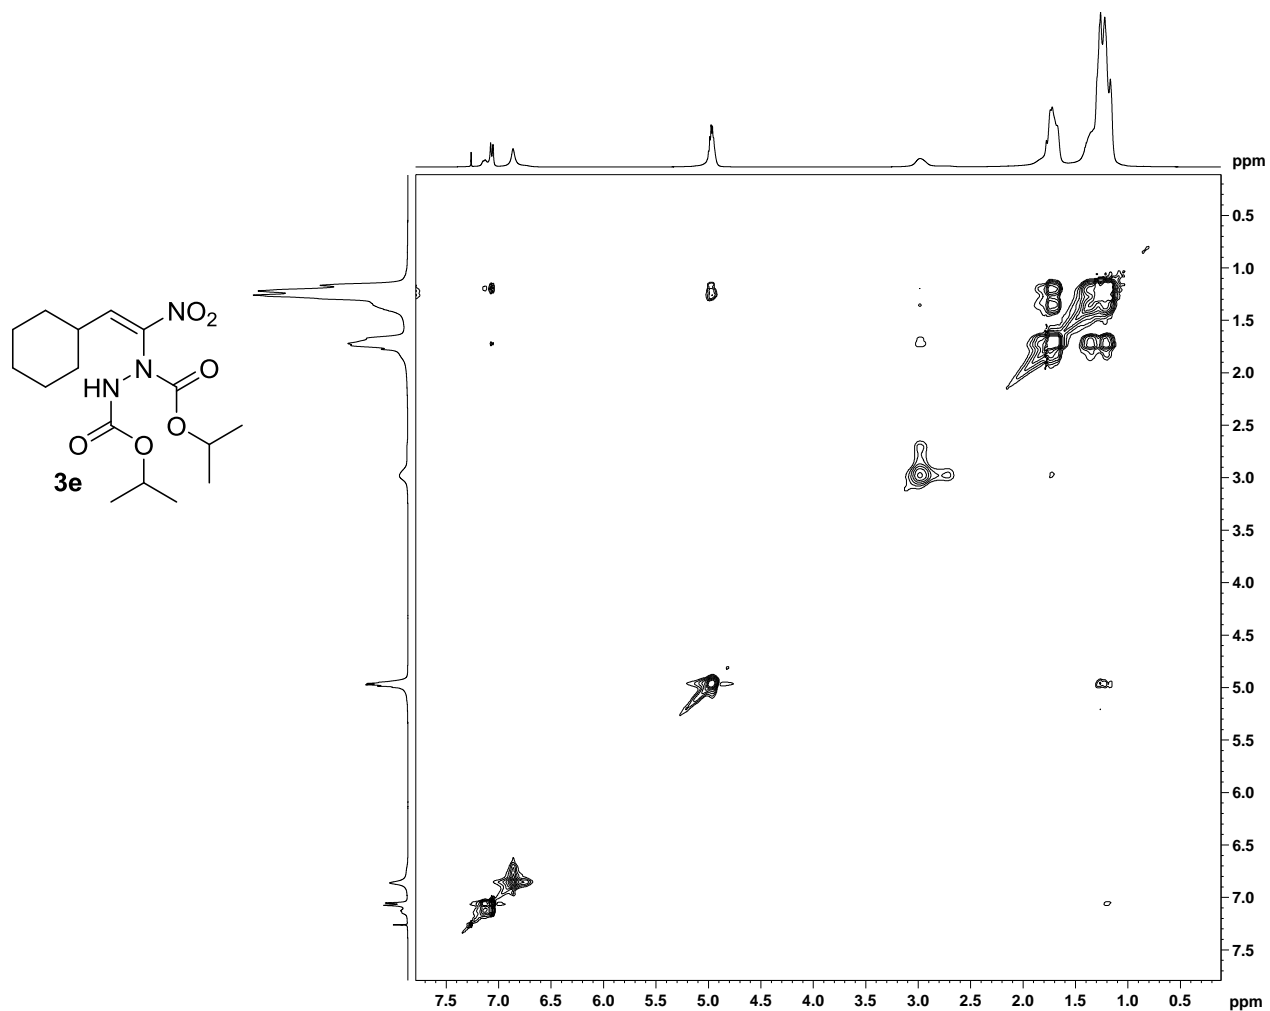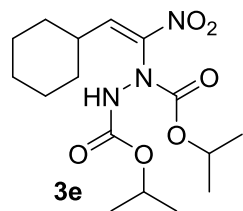

Current Data Parameters  
 NAME INN-MVD-CYCLOHEXANEDIAD-NOESY  
 EXPNO 2  
 PROCNO 1

F2 - Acquisition Parameters  
 Date\_ 20150331  
 Time 0.43  
 INSTRUM spect  
 PROBHD 5 mm PABBO BB/  
 PULPROG noesygpph  
 TD 2048  
 SOLVENT CDCl3  
 NS 16  
 DS 32  
 SWH 3840.246 Hz  
 FIDRES 1.875120 Hz  
 AQ 0.2666496 sec  
 RG 85.91  
 DW 130.200 usec  
 DE 6.50 usec  
 TE 293.9 K  
 D0 0.00011365 sec  
 D1 1.00000000 sec  
 D8 0.60000002 sec  
 D16 0.00020000 sec  
 IN0 0.00026040 sec

===== CHANNEL f1 =====  
 SF01 500.1319879 MHz  
 NUC1 1H  
 P1 13.00 usec  
 P2 26.00 usec  
 PLW1 13.00000000 W

===== GRADIENT CHANNEL =====  
 GPNAM[1] SMSQ10.100  
 GPZ1 40.00 %  
 P16 1000.00 usec

F1 - Acquisition parameters  
 TD 915  
 SF01 500.132 MHz  
 FIDRES 4.196990 Hz  
 SW 7.678 ppm  
 F1MODE TPPI

F2 - Processing parameters  
 SI 1024  
 SF 500.1300116 MHz  
 WDW QSINE  
 SSB 2  
 LB 0 Hz  
 GB 0  
 PC 1.00

F1 - Processing parameters  
 SI 1024  
 MC2 TPPI  
 SF 500.1300116 MHz  
 WDW QSINE  
 SSB 2  
 LB 0 Hz  
 GB 0

Figure S15. <sup>1</sup>H-<sup>1</sup>H NOESY Spectrum of **3e**

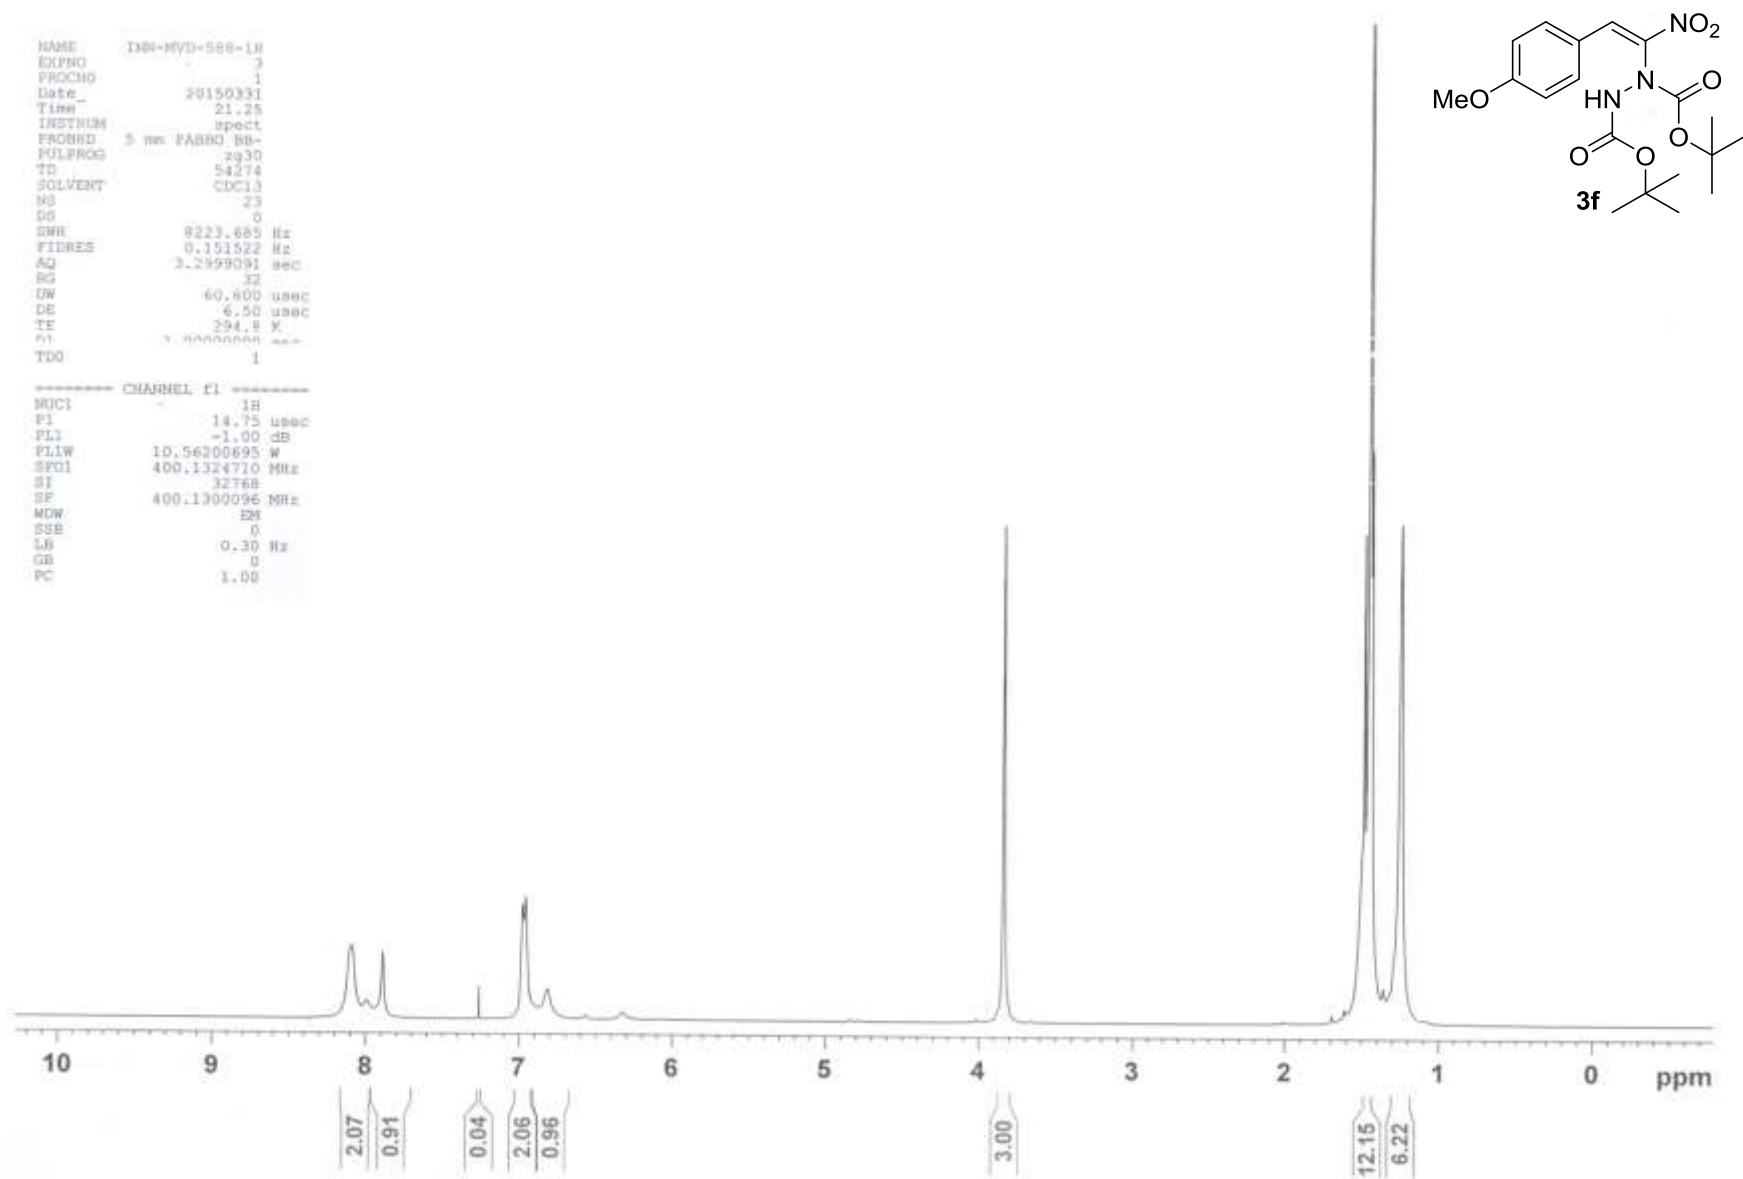

Figure S16.  $^1\text{H}$  NMR Spectrum of **3f**

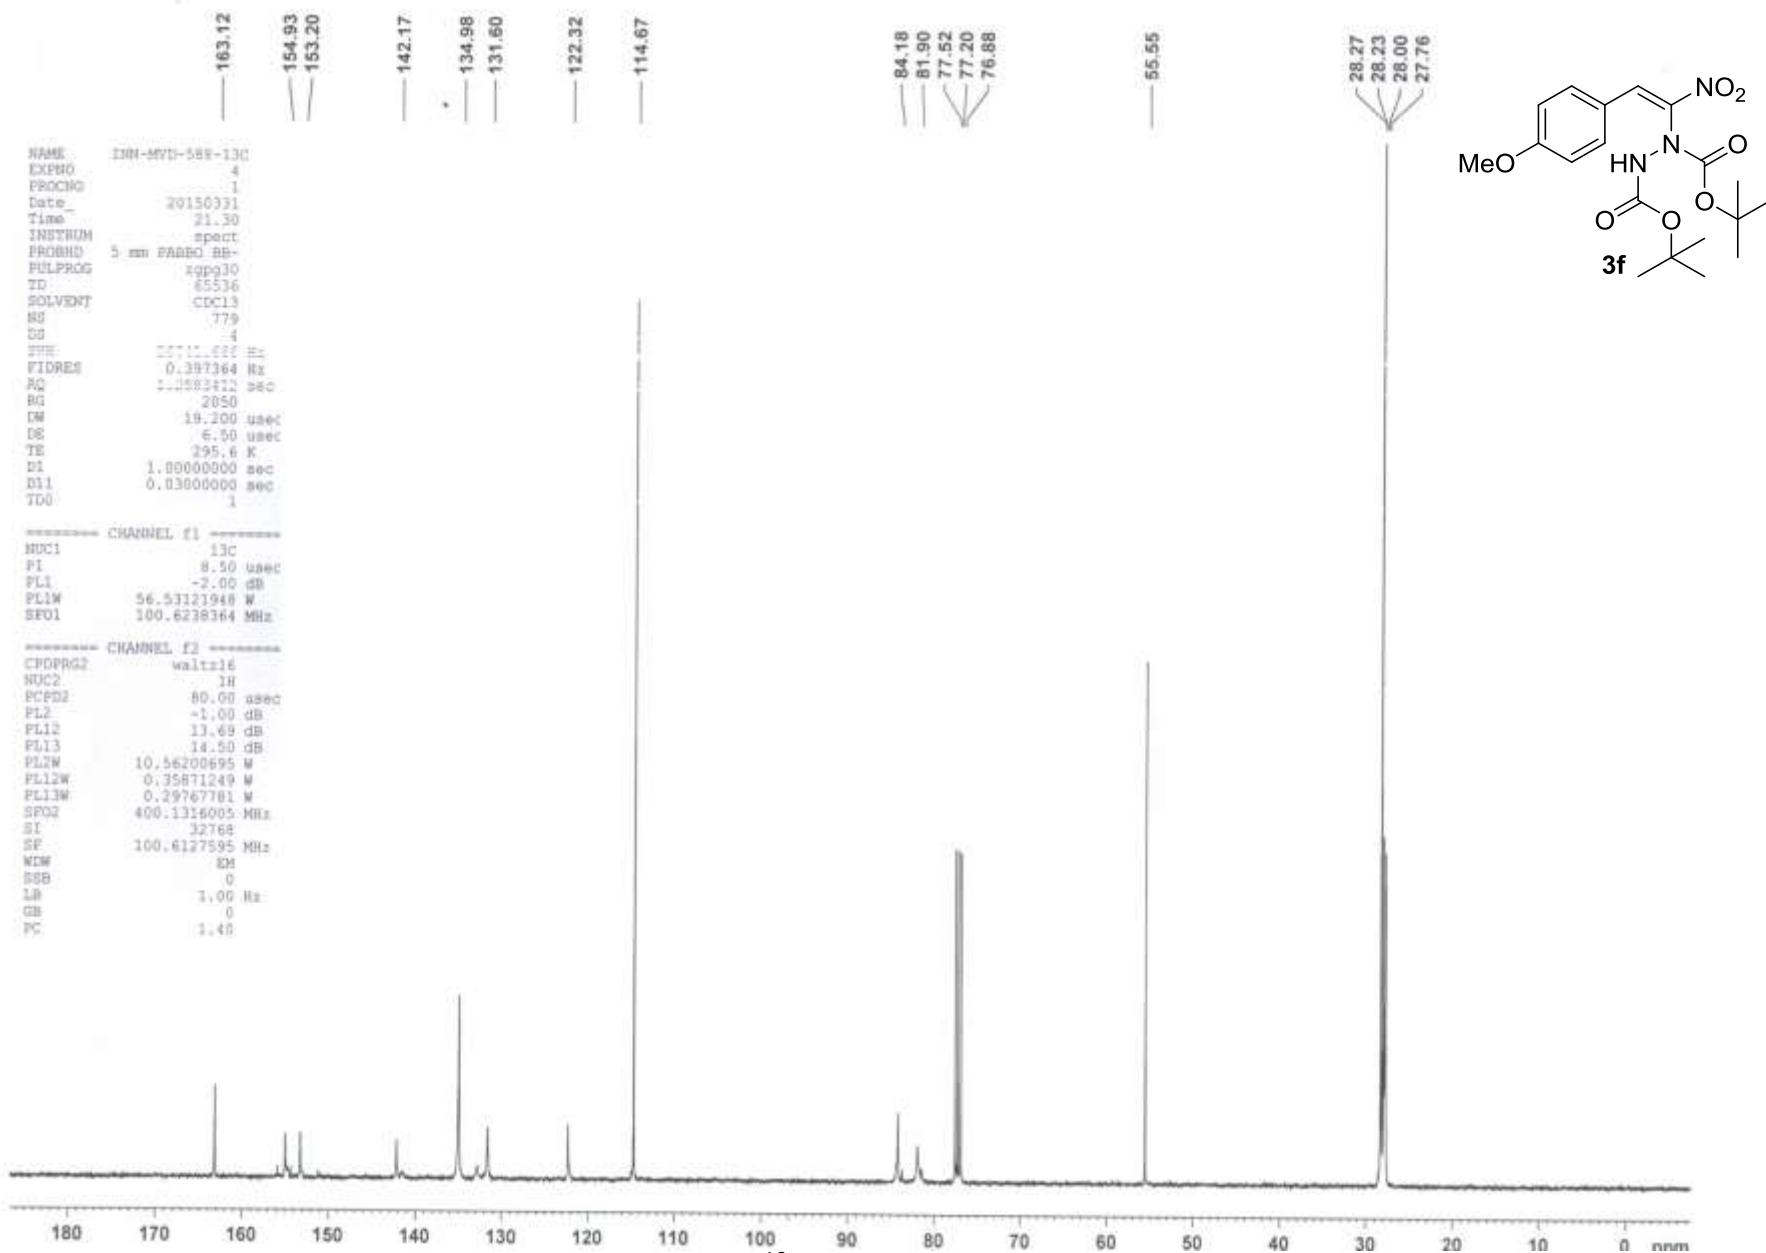

Figure S17. <sup>13</sup>C NMR Spectrum of **3f**

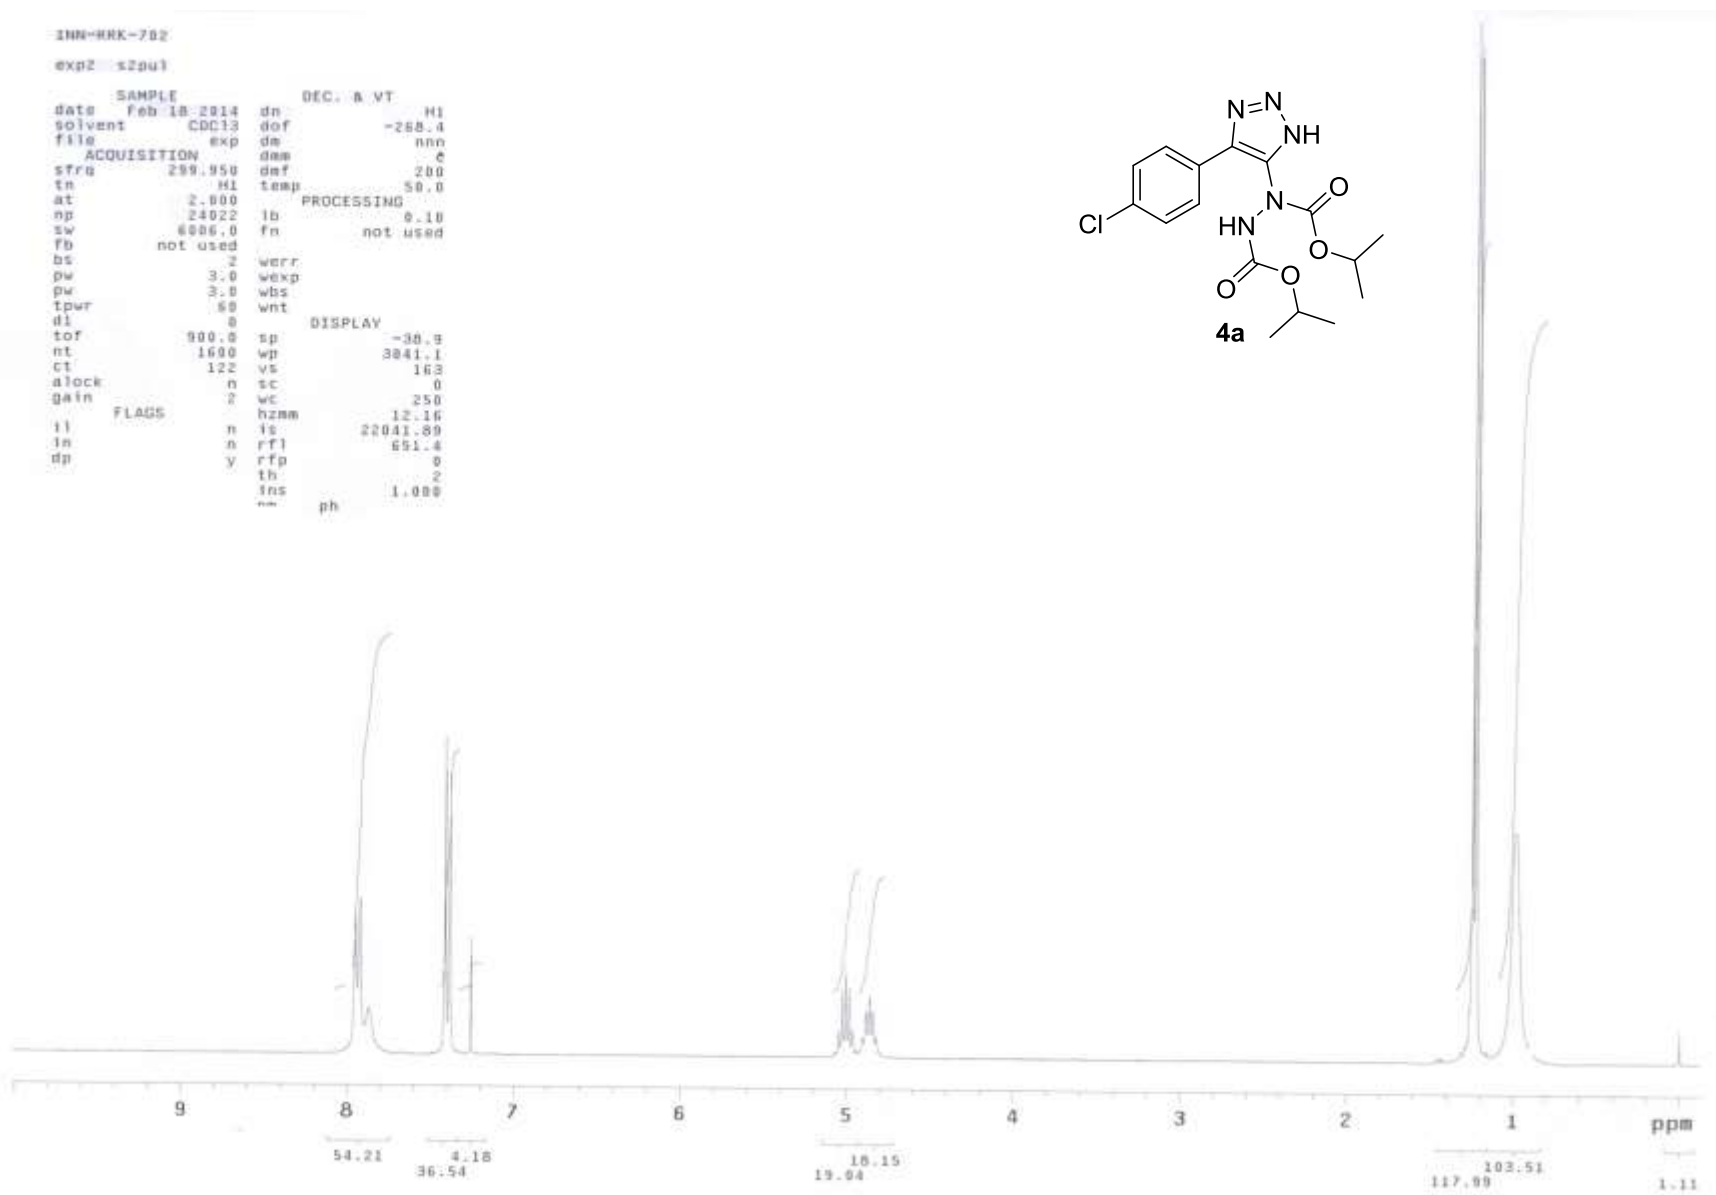

Figure S18.  $^1\text{H}$  NMR Spectrum of **4a**

INN-RRK-702

exp3 t2pu1

| SAMPLE      |             | SPECIAL    |          |
|-------------|-------------|------------|----------|
| date        | Feb 18 2014 | temp       | 50.0     |
| solvent     | CDCl3       | gain       | 2        |
| file        | exp         | spin       | 20       |
| ACQUISITION |             | SPECIAL    |          |
| sw          | 25000.0     | pw90       | 0.000    |
| at          | 1.280       | alfa       | 20.000   |
| np          | 64000       | FLAGS      |          |
| fb          | 13000       | ll         | n        |
| bs          | 4           | fn         | n        |
| dl          | 3.000       | dp         | y        |
| nt          | 4800        | hs         | nn       |
| ct          | 780         | PROCESSING |          |
| TRANSMITTER |             | lb         | 2.00     |
| tn          | C13         | fn         | not used |
| sfrq        | 75.427      | DISPLAY    |          |
| tof         | -2000.0     | sp         | -36.0    |
| tpwr        | 59          | wp         | 15148.2  |
| pw          | 4.750       | rfl        | 12773.1  |
| DECOUPLER   |             | rfp        | \$815.0  |
| dn          | H1          | rp         | -156.6   |
| dof         | 0           | lp         | -327.8   |
| dm          | yyy         | PLOT       |          |
| dmm         | w           | wc         | 250      |
| dpwr        | 39          | sc         | 0        |
| daf         | 10300       | vs         | 64       |
|             |             | th         |          |
|             |             | nm         | cdc ph   |

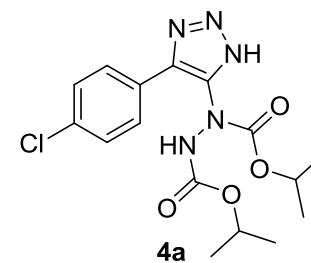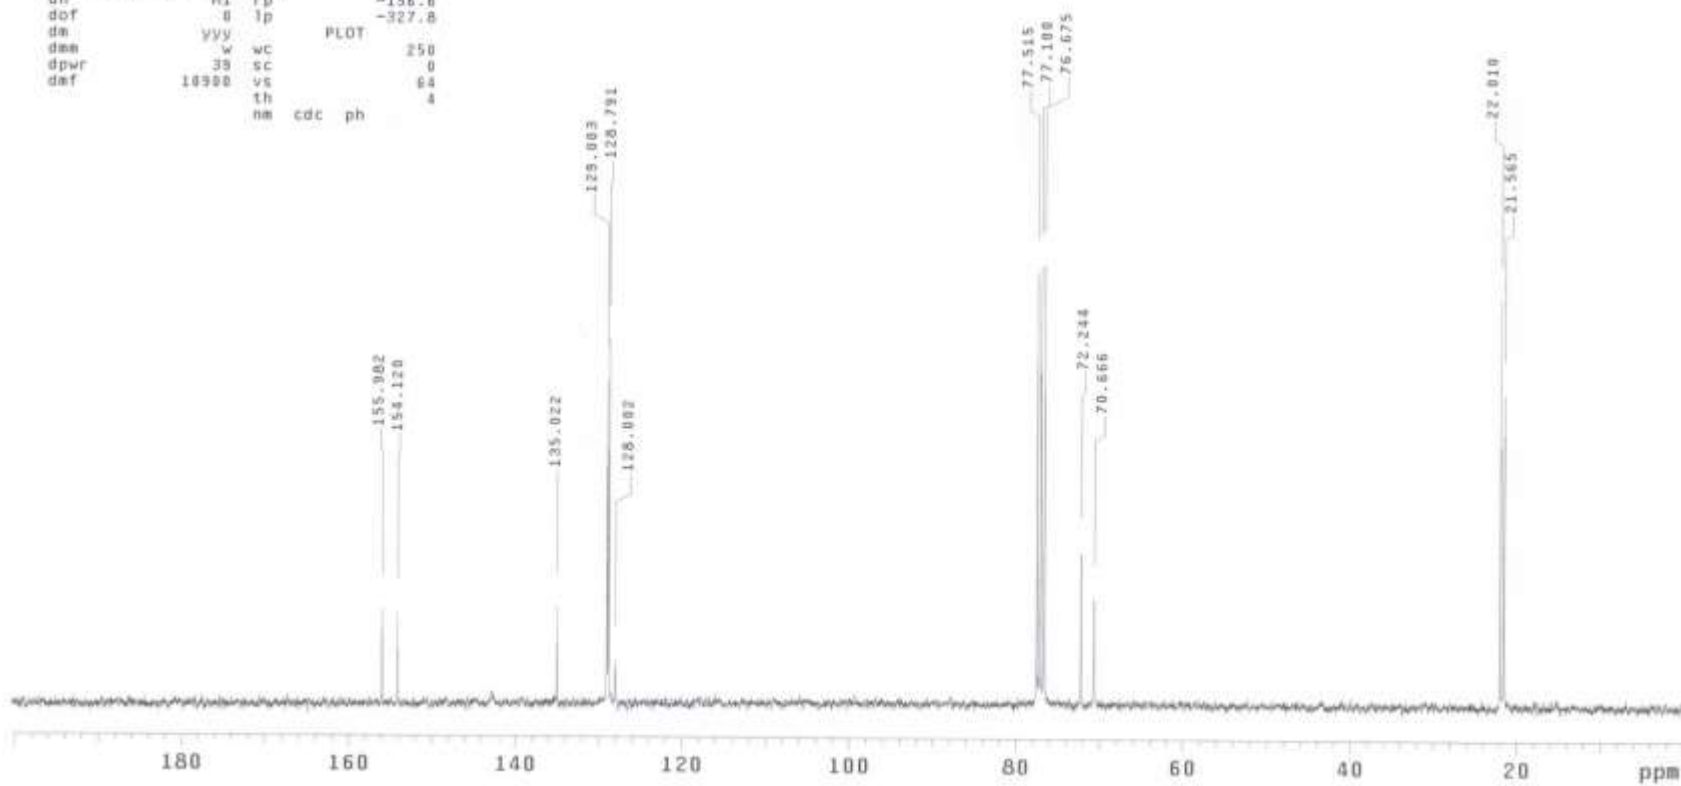

Figure S19.  $^{13}\text{C}$  NMR Spectrum of **4a**

```

INN-MVD-528
exp1 s2pu1
SAMPLE          DEC. & VT
date   May 27 2015   dn
solvent  CDCl3      dof   -268.4
file  /export/home/ dn
vnmr1/2015/May/Int- dnm
ernal/INN-Mane/INN- dmf   200
-MVD-528.fid      temp  55.0
ACQUISITION      PROCESSING
sFrg  299.950     lb      0.10
In     H1         fn      not used
at     1.395
ap     23948      verr
sw     6006.0     wexp
fb     not used   wbs
ds     2          wnt
pw     3.0       DISPLAY
pw     3.0       sp      -62.7
tpwr   60        wp      3044.8
d1     0         vt      139
tof     900.0    sc      0
nt     3200      wc      250
ct     630      hzmm   24.02
dlock  n         ls     19575.86
gain   2         rfi    644.8
      FLAGS     rfp    0
il     n         th     2
in     n         ins   1.088
dp     y         nm     ph

```

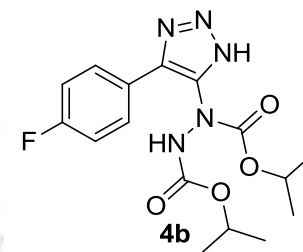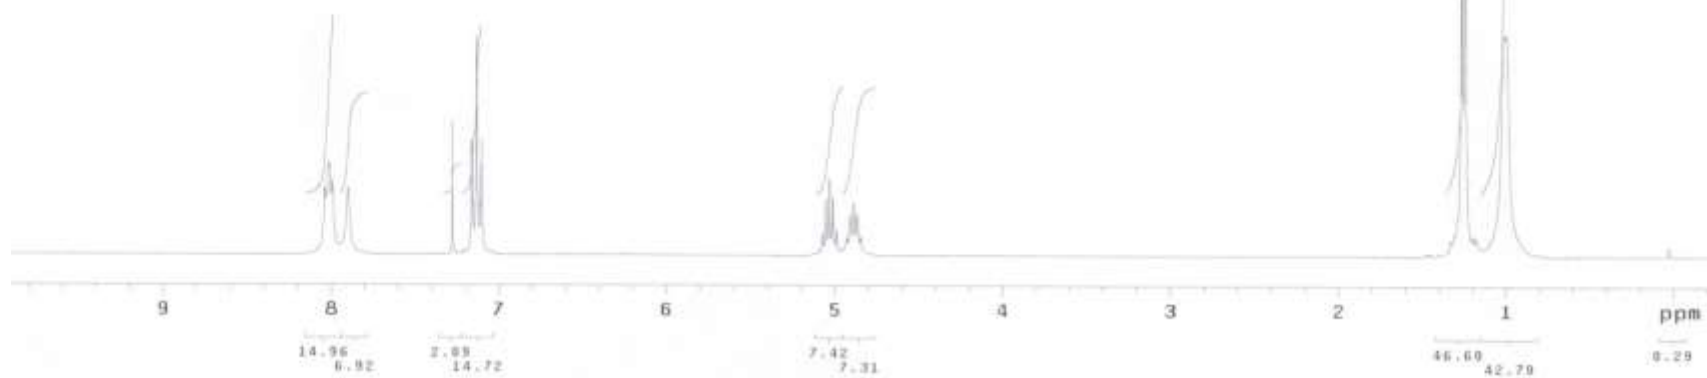

Figure S20. <sup>1</sup>H NMR Spectrum of **4b**

INN-MVD-529

exp3 s2pu1

| SAMPLE      |             | SPECIAL    |          |
|-------------|-------------|------------|----------|
| date        | May 27 2015 | temp       | 55.0     |
| solvent     | CDCl3       | gain       | 2        |
| file        | exp         | spin       | not used |
| ACQUISITION |             | SPECIAL    |          |
| sw          | 25000.0     | pw90       | 11.500   |
| at          | 1.815       | alfa       | 20.000   |
| np          | 90752       | FLAGS      |          |
| fb          | 13800       | ll         | n        |
| bs          | 4           | lh         | n        |
| d1          | 3.000       | dp         | y        |
| nt          | 8000        | hs         | nn       |
| ct          | 884         | PROCESSING |          |
| tn          | C13         | lb         | 3.00     |
| sfrq        | 75.430      | fn         | not used |
| tof         | 748.9       | DISPLAY    |          |
| tpwr        | 56          | sp         | -232.0   |
| pw          | 4.750       | wp         | 15308.4  |
| DECOUPLER   |             | rfl        | 18022.4  |
| dn          | H1          | rfg        | 5615.0   |
| dof         | 0           | rp         | -126.6   |
| dm          | VVY         | lp         | -396.2   |
| dma         | w           | PLOT       |          |
| dpwr        | 39          | vc         | 250      |
| daf         | 11300       | sc         | 0        |
|             |             | vs         | 91       |
|             |             | th         | 3        |
|             |             | nm         | ph       |

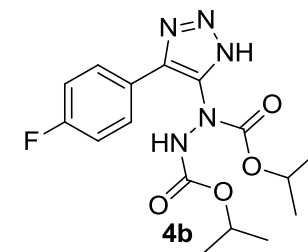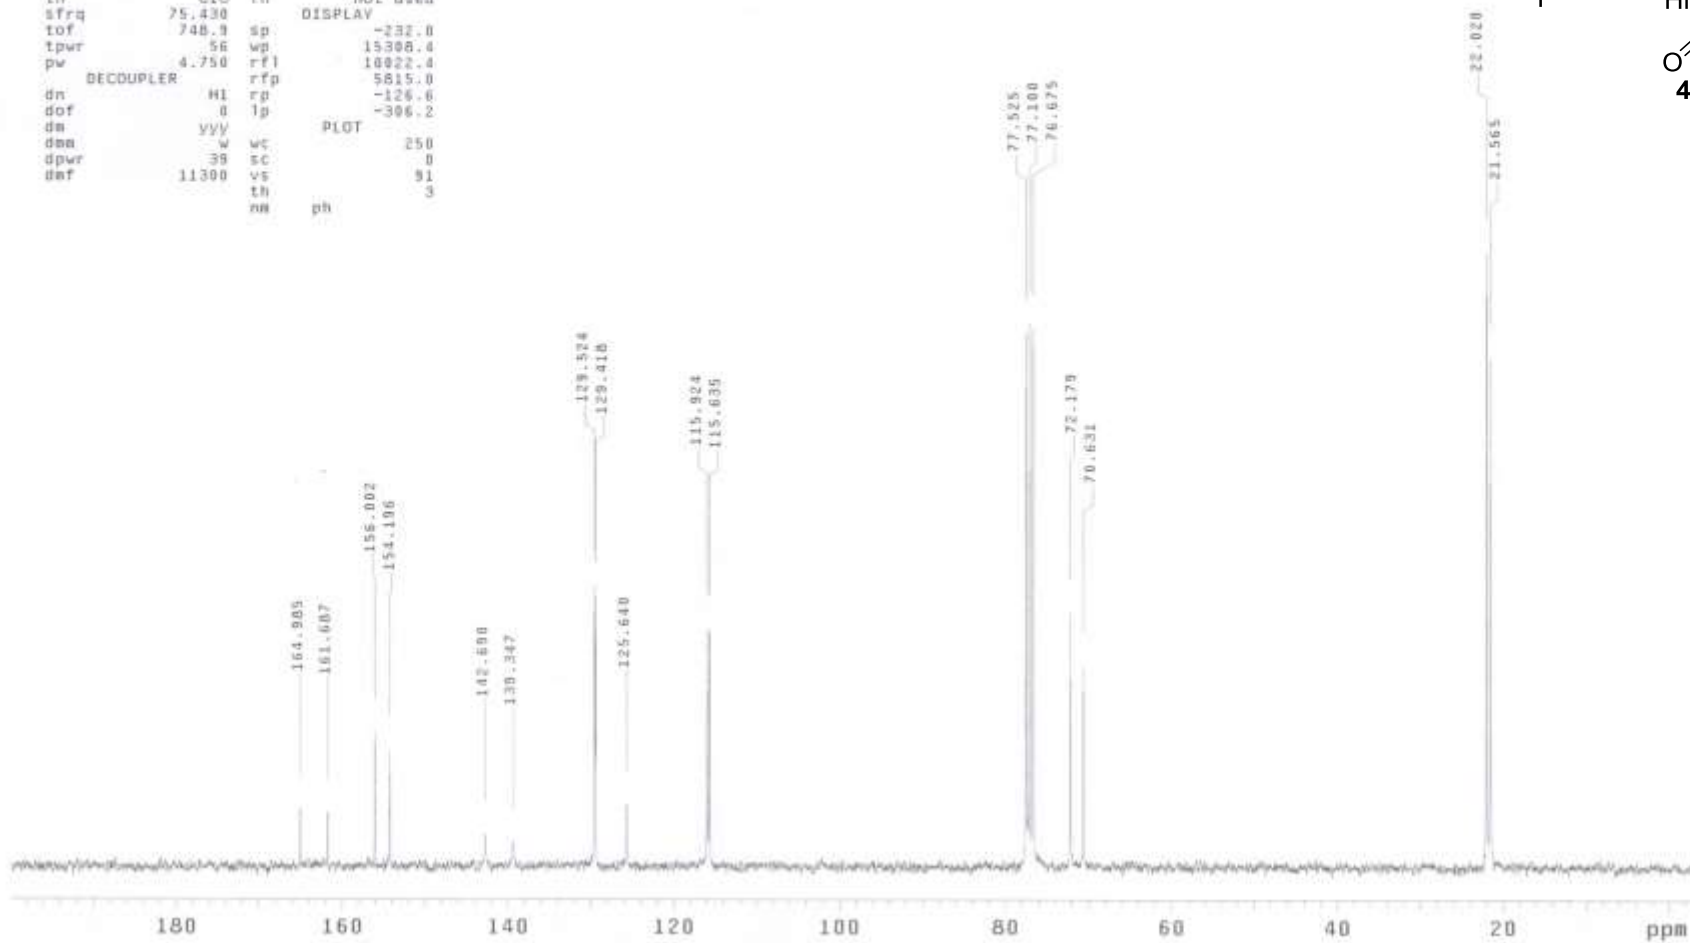

Figure S21.  $^{13}\text{C}$  NMR Spectrum of **4b**

```

NAME      2180-MVD-529-19F
EXPNO     3
PROCNO    1
Date_     20150428
Time      22.58
INSTRUM   spect
PROBHD    5 mm PABBO BB-
PULPROG   zgpg30
TD        131072
SOLVENT   CDCl3
NS         41
DS         4
SWH        89285.711 Hz
FIDRES     0.681196 Hz
AQ         0.7340532 sec
RG         724
DW         5.600 usec
DE         6.30 usec
TE         296.2 K
D1         1.0000000 sec
TDO        1

----- CHANNEL f1 -----
NUC1       19F
P1         12.00 usec
PL1        -3.00 dB
PL1M       17.04036522 W
SFO1       376.4607164 MHz
SI         65536
SF         376.4983660 MHz
WDW        EM
SSB        0
LB         0.30 Hz
GB         0
PC         1.00

```

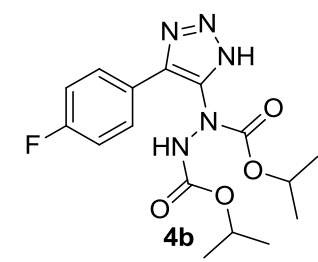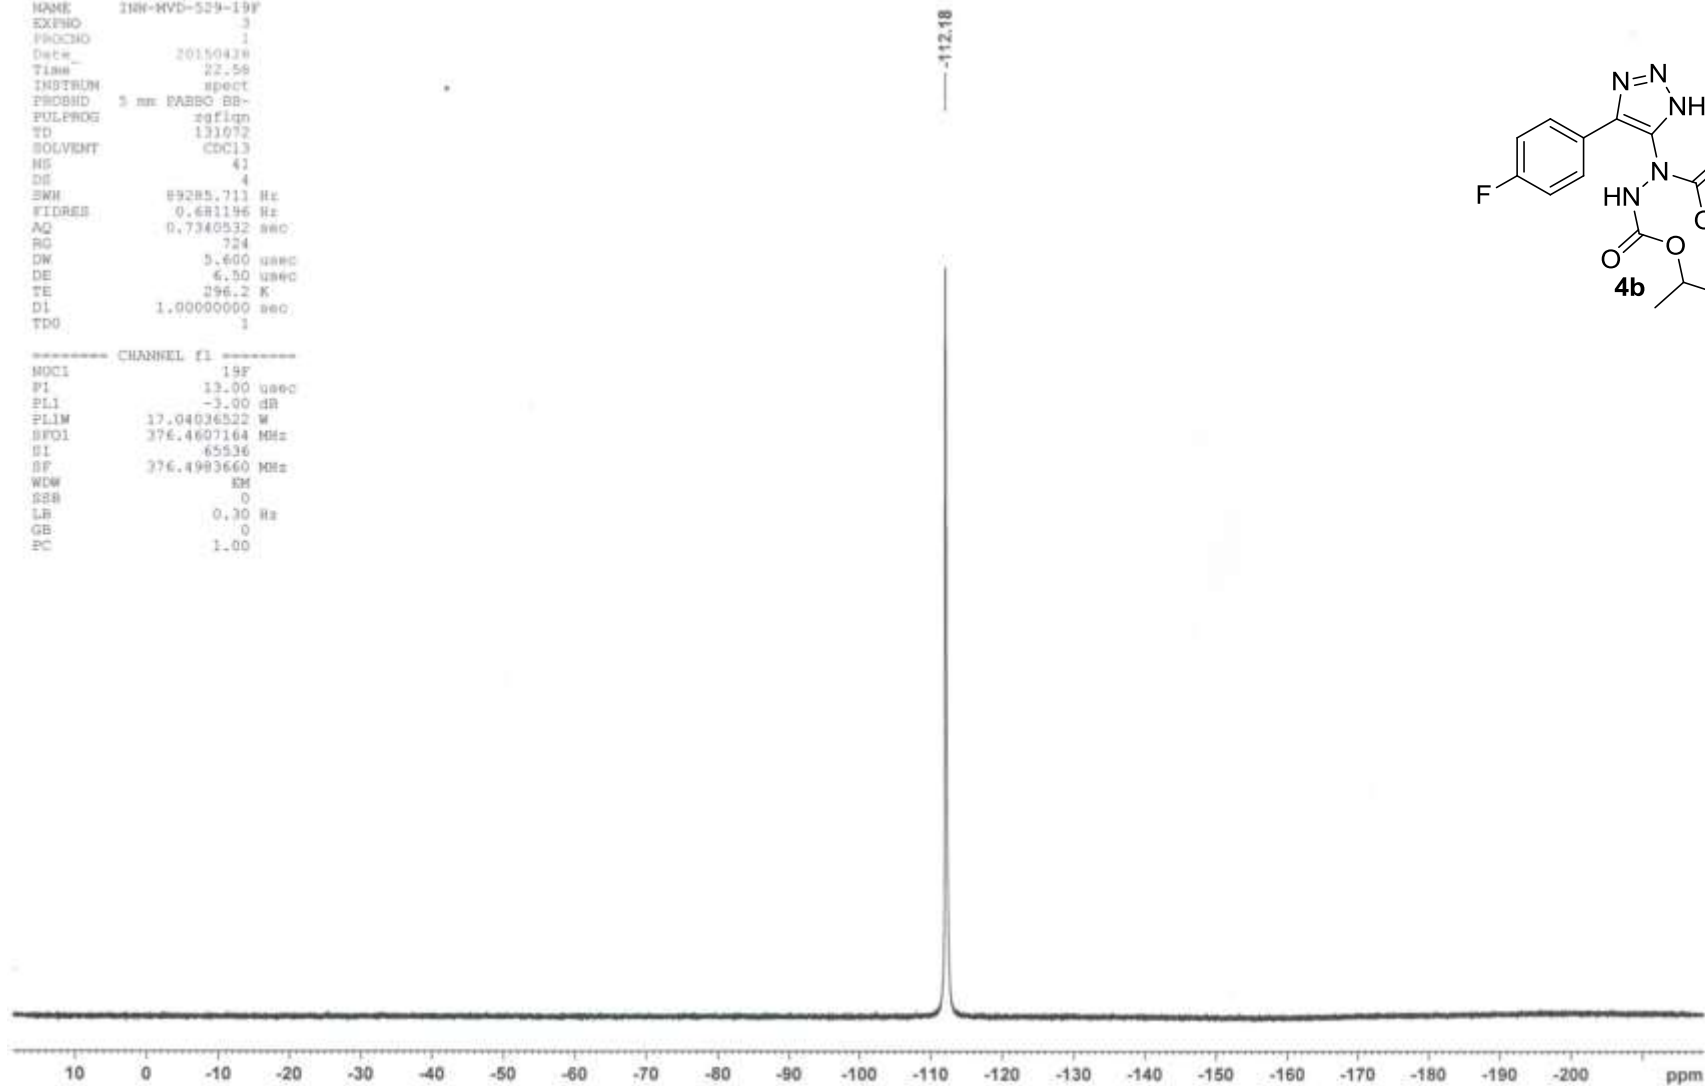

Figure S22. <sup>19</sup>F NMR Spectrum of **4b**



```

INN-RRK-701
exp2 szau1

SAMPLE          DEC. A VT
date Feb 18 2014 dn
solvent CD3OD  dof -288.4
file          exp  dm
ACQUISITION    exp  dm
sfrq 299.951  dmf 200
in      H1      temp 50.0
at      2.000   PROCESSING
np      24022  lb  0.10
sw      6686.0  fn  not used
fb      not used
bs      2      werr
pw      3.0   wexp
pw      3.0   wbs
tpwr    60    wnt
d1      0
tof      900.0  sp
nt      1600  wp 3622.2
ct      318   vs 107
elock   n    sc  0
gain    2    wc 250
          hzmm 14.49
          n    ts 10053.40
          n    rfl 1642.3
          y    rfp 992.0
          th  2
          lns 1.000
          nm  ph

```

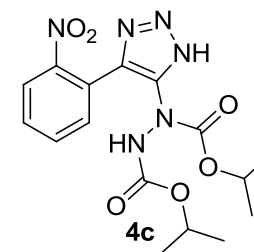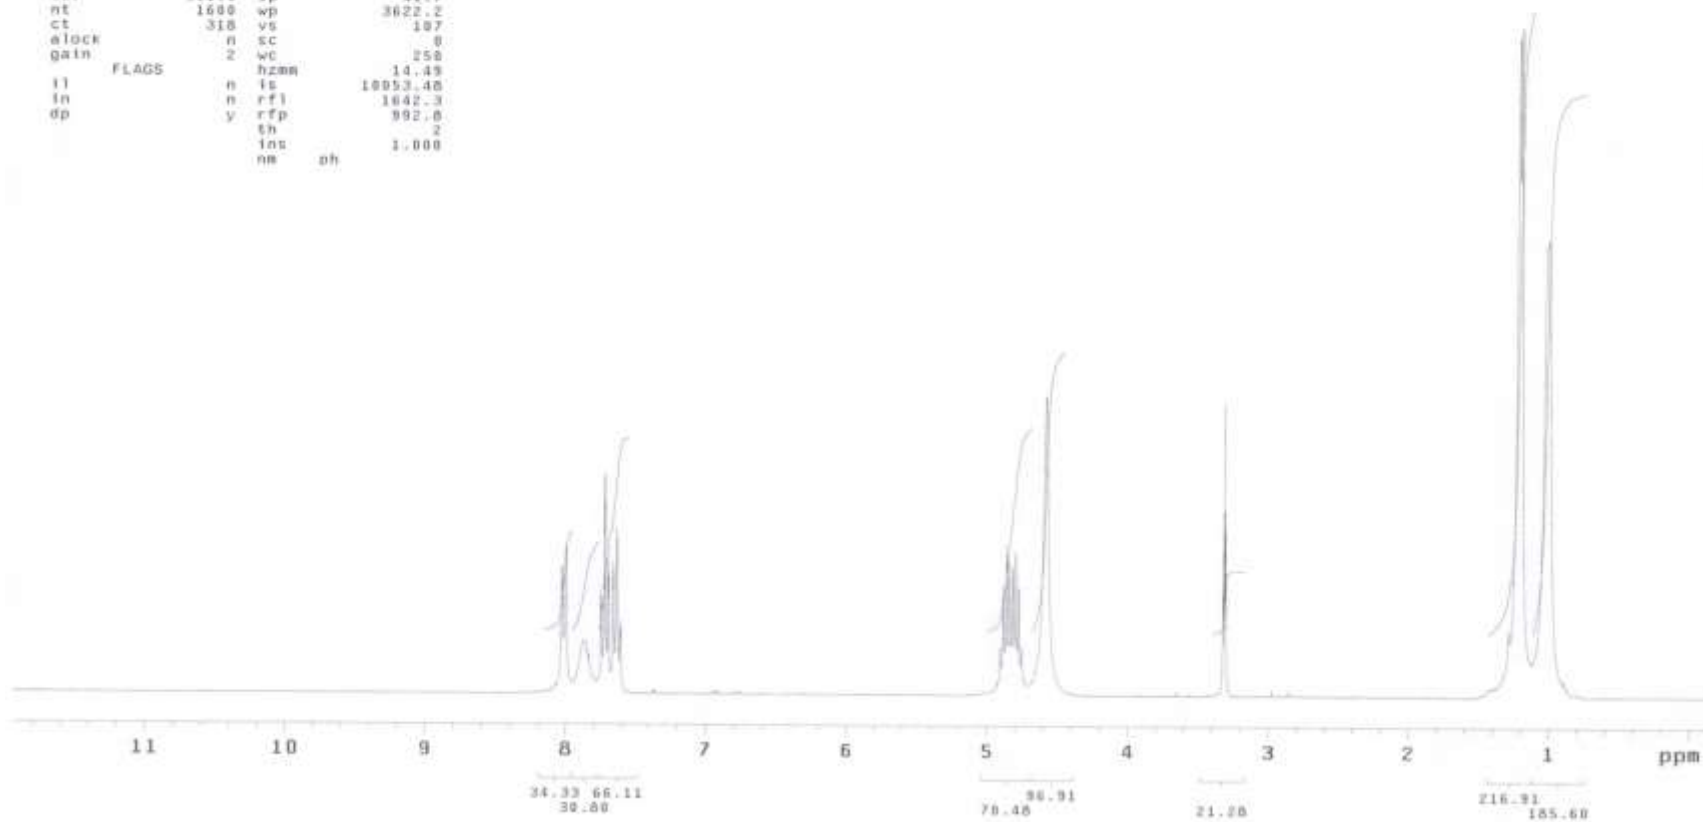

Figure S23. <sup>1</sup>H NMR Spectrum of **4c**

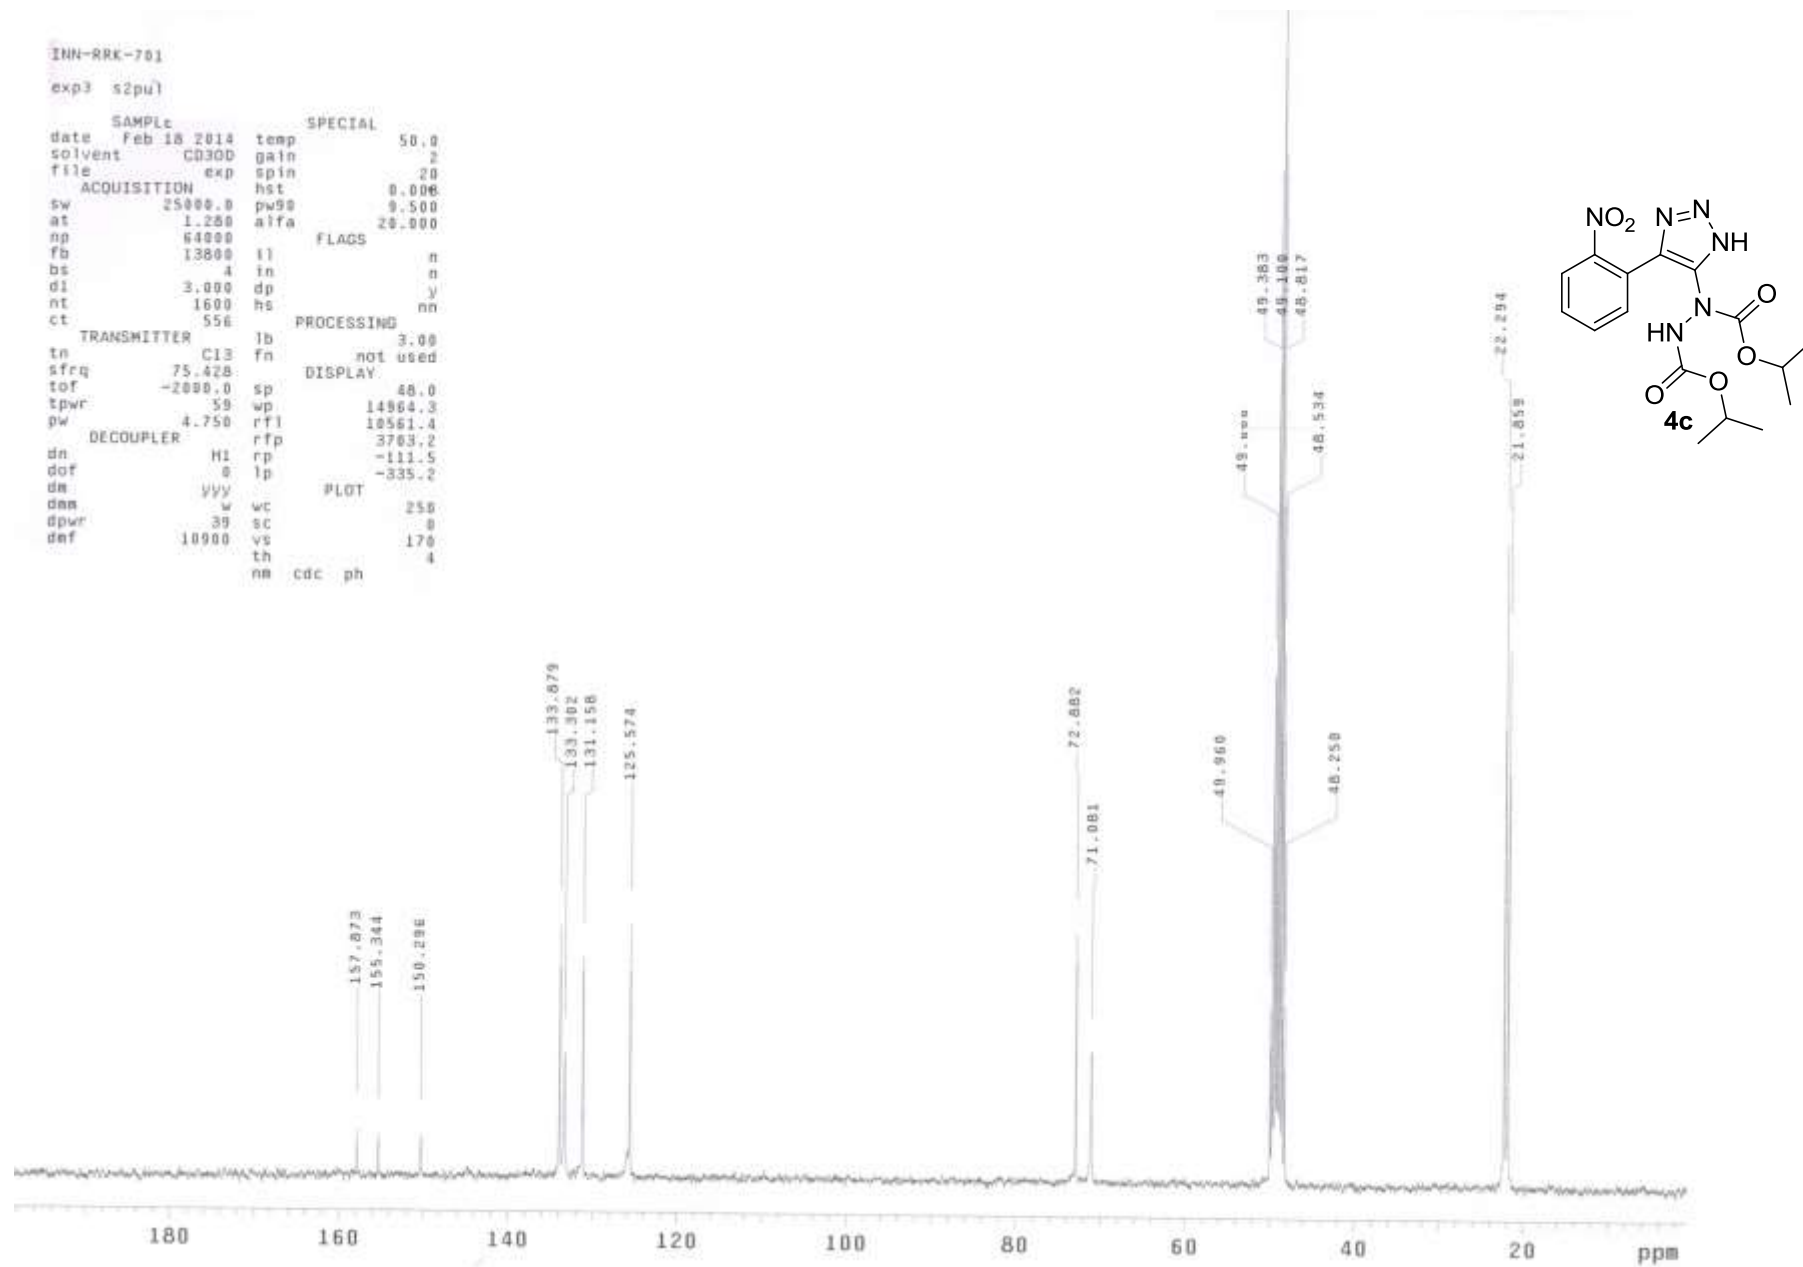

Figure S24.  $^{13}\text{C}$  NMR Spectrum of **4c**

Current Data Parameters  
NAME INN-RKC-69B-1H@50°C  
EXPNO 18  
PROCNO 1

F2 - Acquisition Parameters  
Date\_ 20140124  
Time 16.20  
INSTRUM spect  
PROBHD 5 mm FABBO BB/  
PULPROG zg30  
TD 33086  
SOLVENT CDCl3  
NS 50  
DS 0  
SWH 11029.412 Hz  
FIDRES 0.333356 Hz  
AQ 1.4998987 sec  
RG 30.72  
DW 45.333 usec  
DE 6.50 usec  
TE 323.0 K  
D1 1.0000000 sec  
TD0 1

==== CHANNEL f1 =====  
SFO1 500.1335009 MHz  
NUC1 1H  
P1 13.00 usec  
PLW1 13.00000000 W

F2 - Processing parameters  
SI 65536  
SF 500.1300111 MHz  
WDW EM  
SSB 0  
LB 0 Hz  
GB 0  
PC 1.00

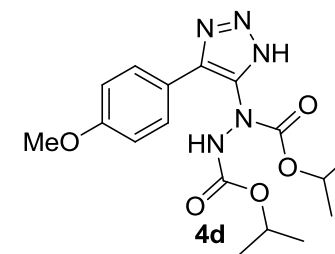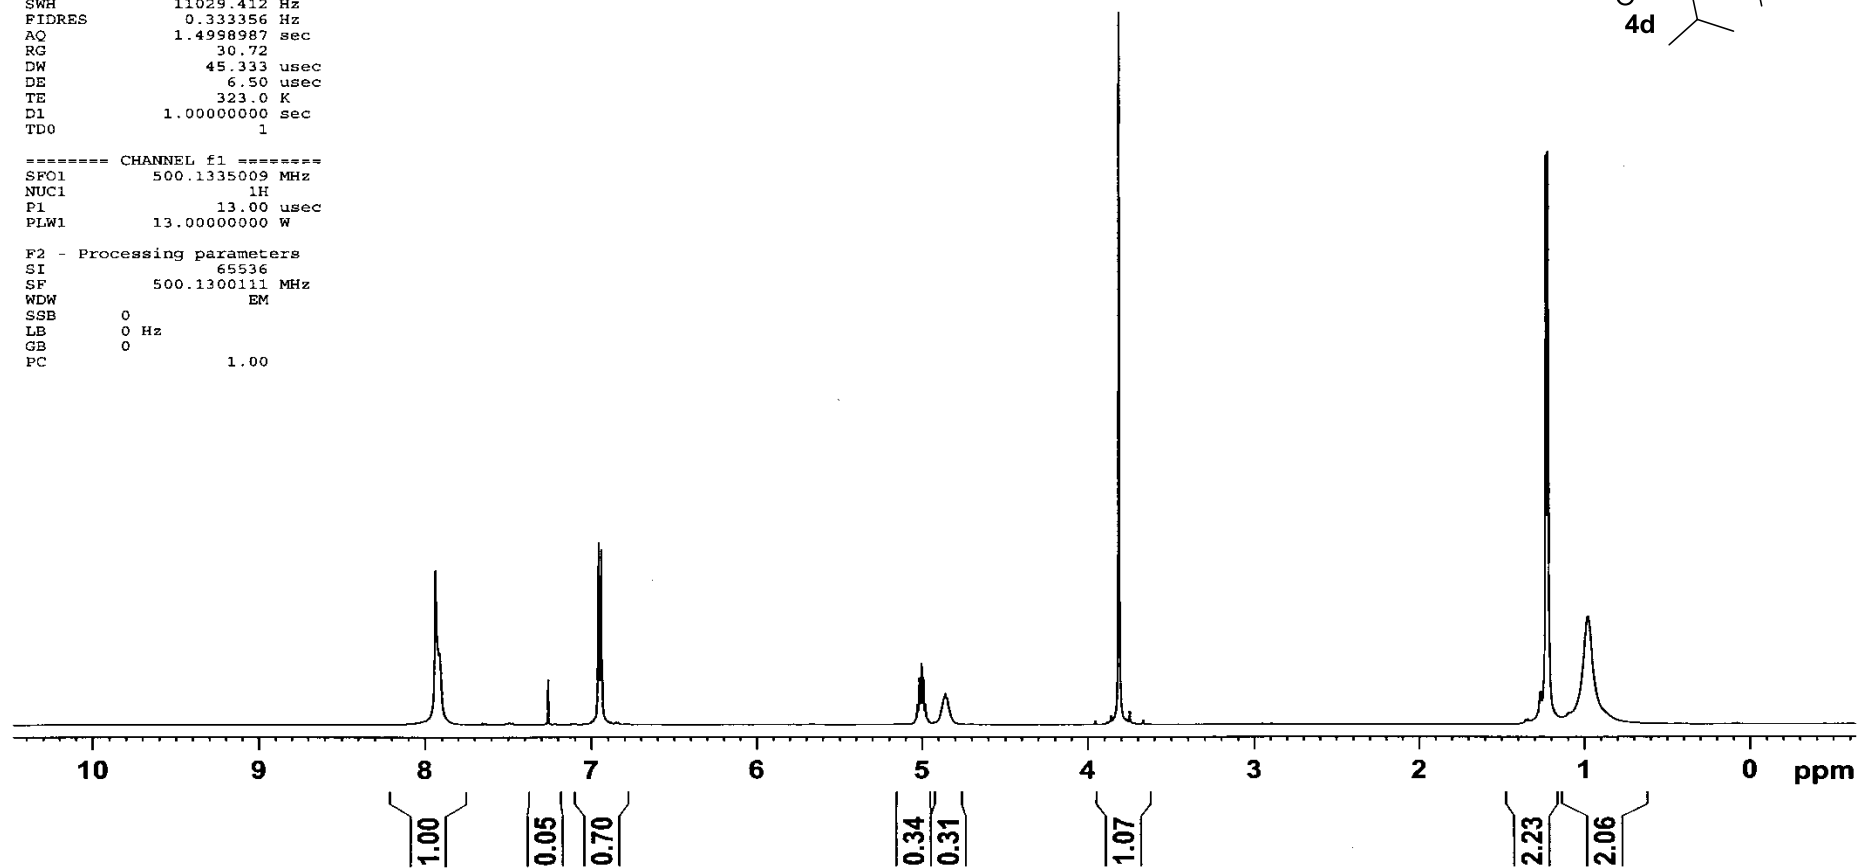

Figure S25. <sup>1</sup>H NMR Spectrum of 4d

Current Data Parameters  
NAME INN-RPK-698-13C@50°C  
EXPNO 20  
PROCNO 1

F2 - Acquisition Parameters  
Date\_ 20140124  
Time 16.26  
INSTRUM spect  
PROBHD 5 mm PABBO BB/  
PULPROG zgpg30  
TD 65536  
SOLVENT CDCl3  
NS 1100  
DS 2  
SWH 34722.223 Hz  
FIDRES 0.529819 Hz  
AQ 0.9437184 sec  
RG 197.27  
DW 14.400 usec  
DE 6.50 usec  
TE 323.1 K  
D1 1.00000000 sec  
D11 0.03000000 sec  
TD0 1

----- CHANNEL f1 -----  
SFO1 125.7721254 MHz  
NUC1 13C  
P1 8.90 usec  
PLW1 103.00000000 W

----- CHANNEL f2 -----  
SFO2 500.1320005 MHz  
NUC2 1H  
CPDPRG(2) waltz16  
PCPD2 80.00 usec  
PLW2 13.00000000 W  
PLW12 0.34327999 W  
PLW13 0.21969999 W

F2 - Processing parameters  
SI 32768  
SF 125.7577593 MHz  
WDW EM  
SSB 0  
LB 1.00 Hz  
GB 0  
PC 1.40

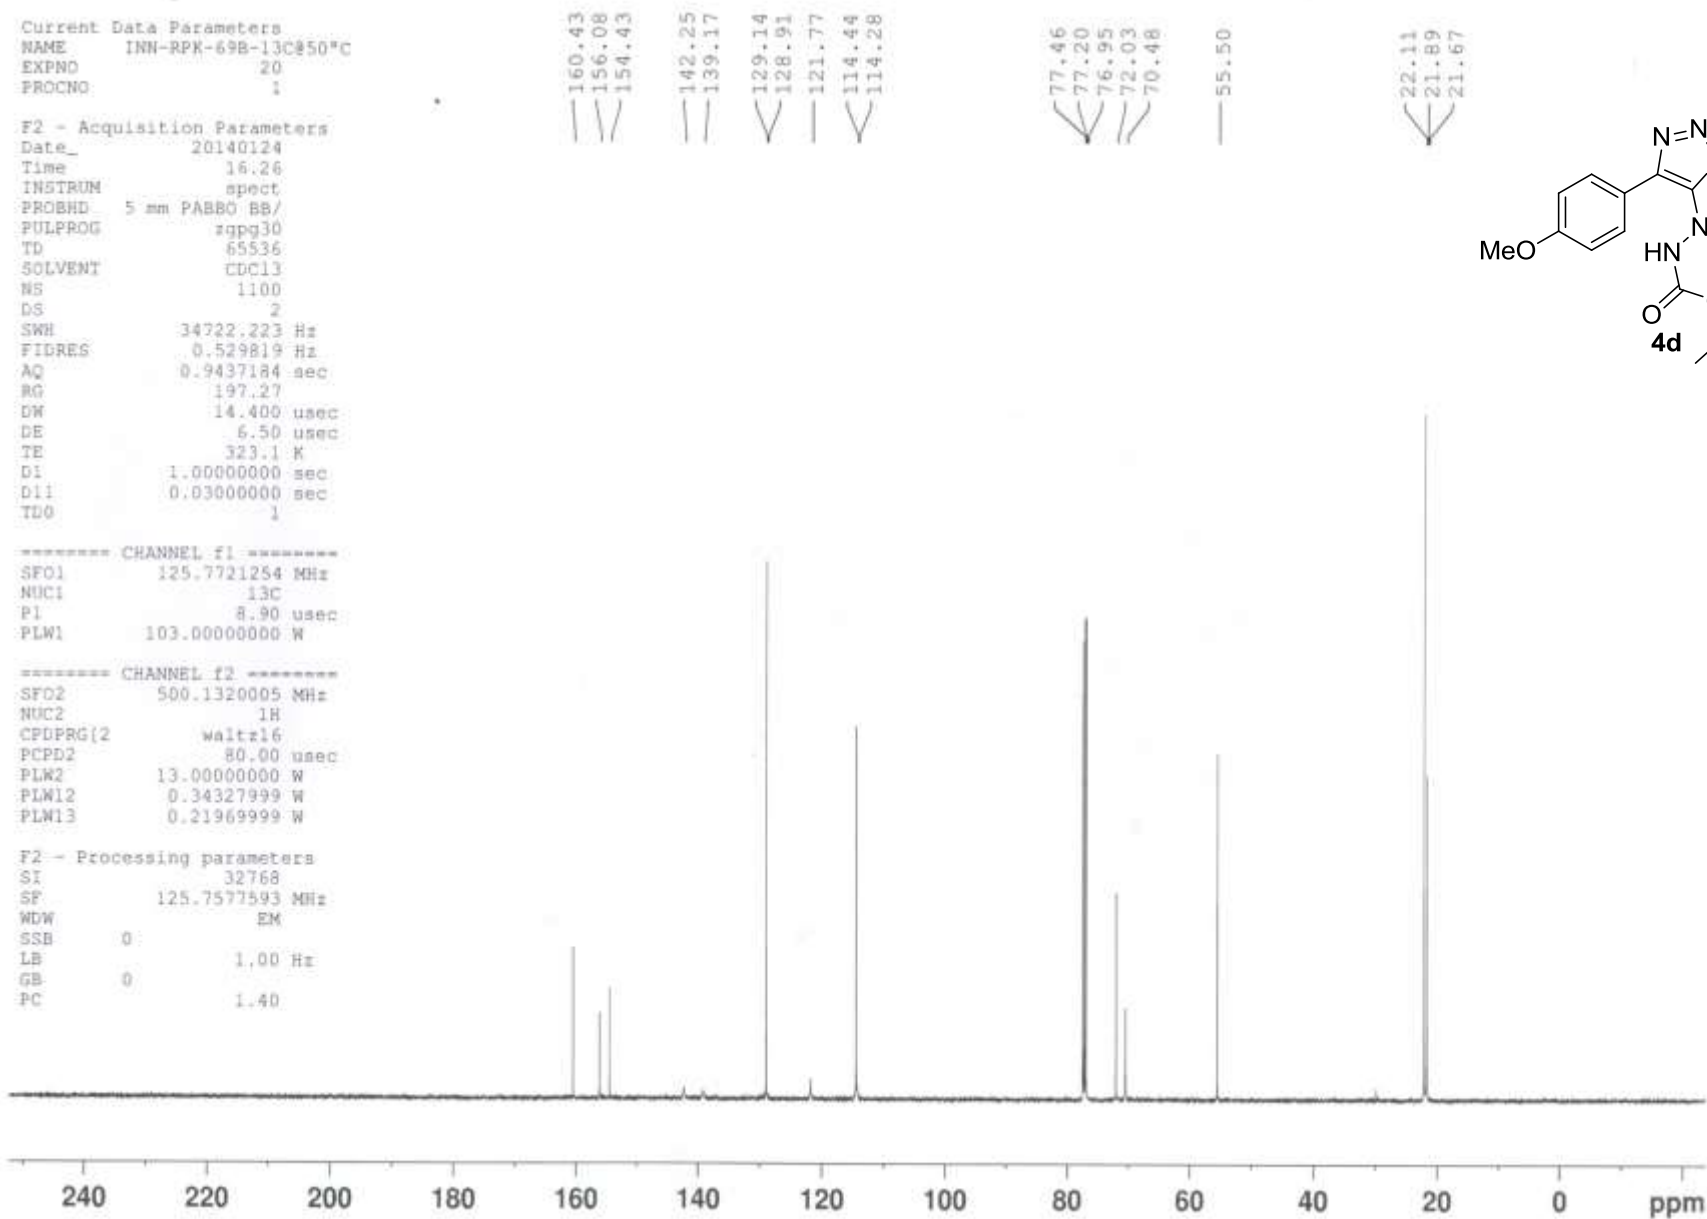

Figure 26. <sup>13</sup>C NMR Spectrum of **4d**

INN-MVD-52 523

exp1 s2pu1

| SAMPLE      |                | DEC. & VT  |          |
|-------------|----------------|------------|----------|
| date        | May 28 2015    | dn         | H1       |
| solvent     | CDCl3          | dof        | -268.4   |
| file        | /export/home/~ | dn         | nnn      |
| vnmr1       | 2015/May/Int-  | dan        | C        |
| ernal       | /INN-Manc/INN- | daf        | 200      |
|             | -MVD-522.f1d   | temp       | 55.0     |
| ACQUISITION |                | PROCESSING |          |
| sfrq        | 299.959        | fn         | not used |
| tn          | H1             |            |          |
| at          | 1.995          | werr       |          |
| np          | 23968          | wexp       |          |
| sw          | 6006.0         | wbs        |          |
| fb          | not used       | wnt        |          |
| bs          | 2              |            |          |
| pw          | 3.0            | sp         | -62.7    |
| pw          | 3.0            | wp         | 3044.6   |
| tpwr        | 60             | vs         | 157      |
| di          | 0              | sc         | 0        |
| tof         | 900.0          | wc         | 250      |
| nt          | 3200           | hzm        | 2.04     |
| ct          | 180            | is         | 6323.99  |
| alock       | n              | rfl        | 639.7    |
| gain        | 2              | rtp        | 0        |
|             | FLAGS          | th         | 2        |
| il          | n              | ins        | 1.000    |
| in          | n              | nm         |          |
| dp          | y              | ph         |          |

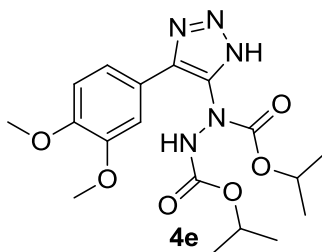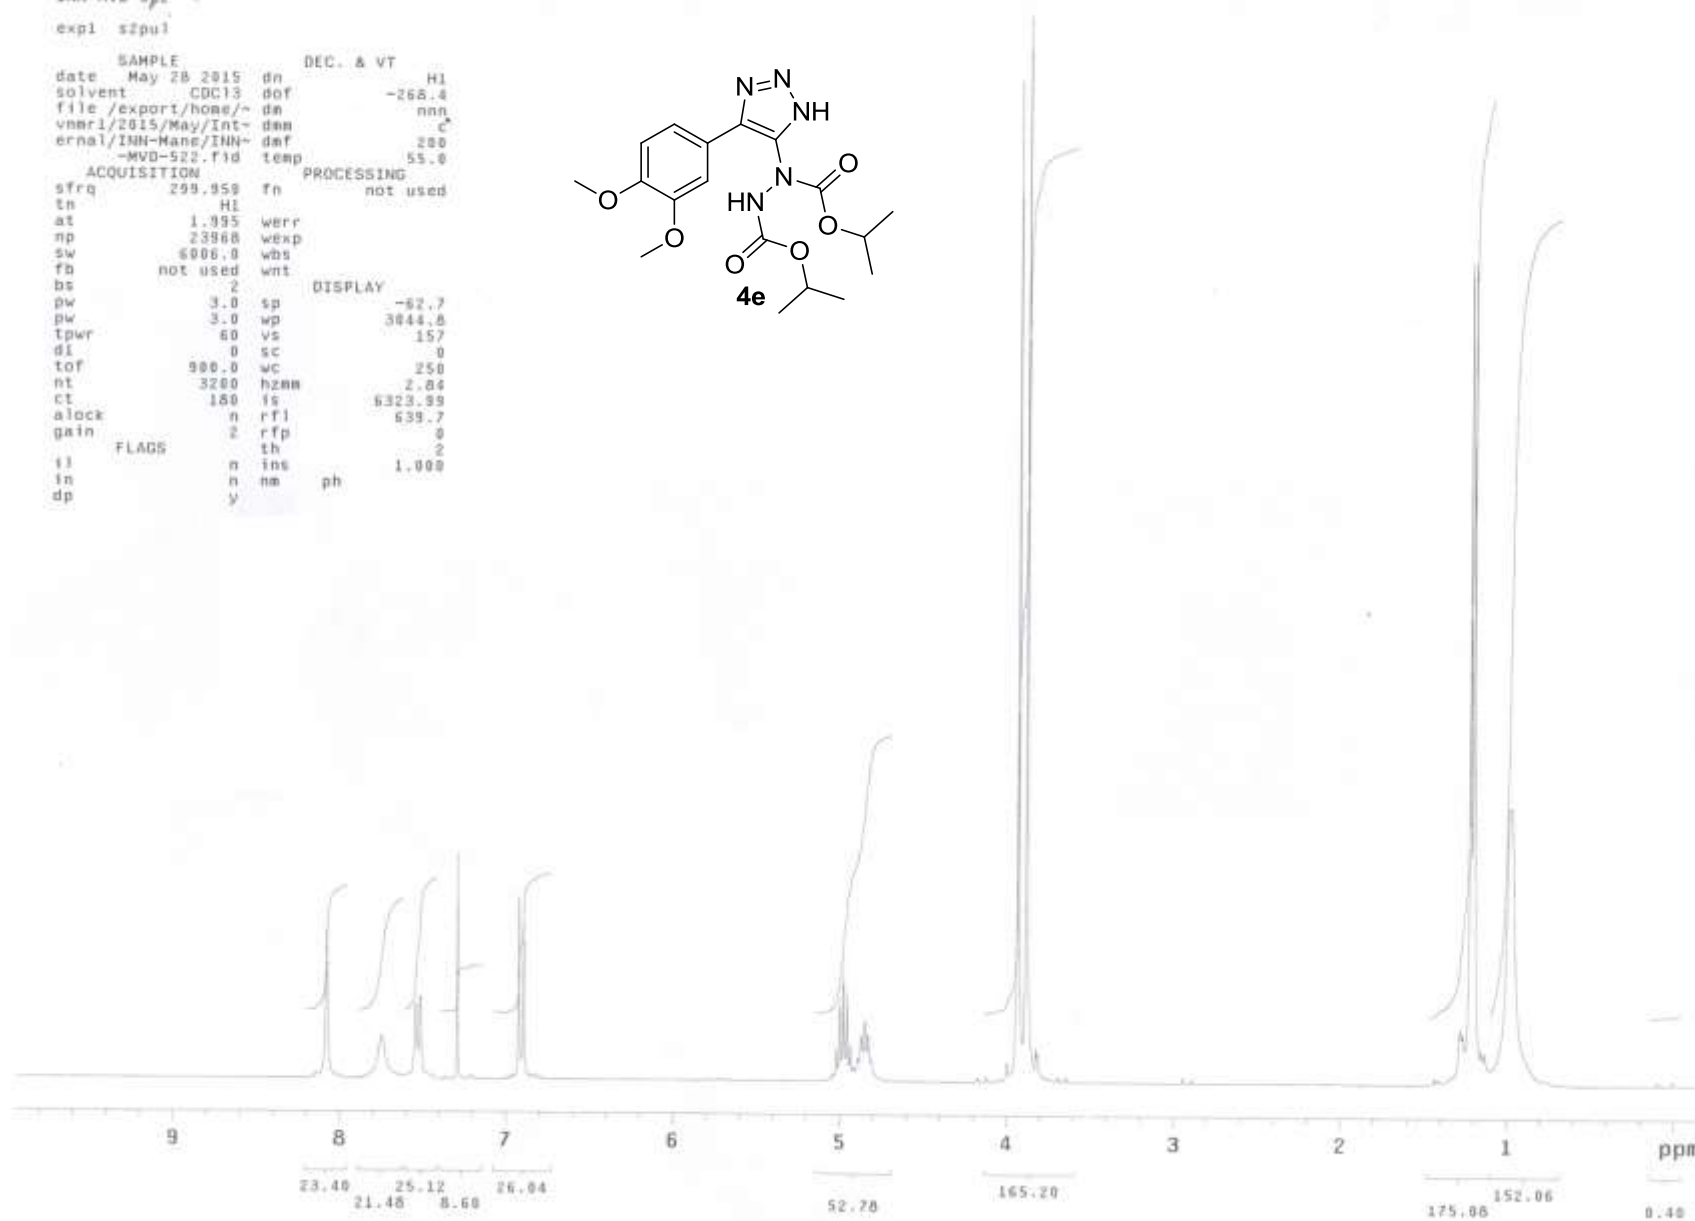

Figure S27. <sup>1</sup>H NMR Spectrum of **4e**

INN-MVB-5J2 S28

exp3 s2pu1

| SAMPLE      |             | SPECIAL    |          |
|-------------|-------------|------------|----------|
| date        | May 28 2015 | temp       | 55.0     |
| solvent     | CDCl3       | gain       | 2        |
| file        |             | spin       | not used |
| ACQUISITION |             |            |          |
| exp         | hsl         | hsl        | 0.000    |
| sw          | 25000.0     | pw90       | 11.500   |
| at          | 1.815       | altA       | 20.000   |
| ap          | 80752       | FLAGS      |          |
| fb          | 13800       | sl         | n        |
| bs          | 4           | hn         | n        |
| dl          | 3.000       | dp         | y        |
| nt          | 1600        | hg         | nn       |
| ct          | 520         | PROCESSING |          |
| TRANSMITTER |             |            |          |
| tn          | C13         | tb         | 3.00     |
| sfrq        | 75.430      | tn         | not used |
| tof         | 748.0       | DISPLAY    |          |
| tpw         | 50          | sp         | -272.9   |
| pw          | 4.750       | wp         | 15538.1  |
| DECOUPLER   |             |            |          |
| dn          | H1          | rfd        | 10032.4  |
| dof         | 0           | rp         | 5815.0   |
| da          | VVV         | lp         | -126.6   |
| das         | w           | PLOT       |          |
| sdw         | 30          | wc         | 250      |
| daf         | 11300       | vs         | 0        |
|             |             | tn         | 90       |
|             |             | ph         | 3        |

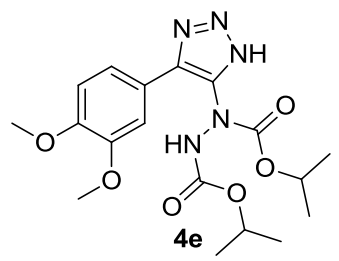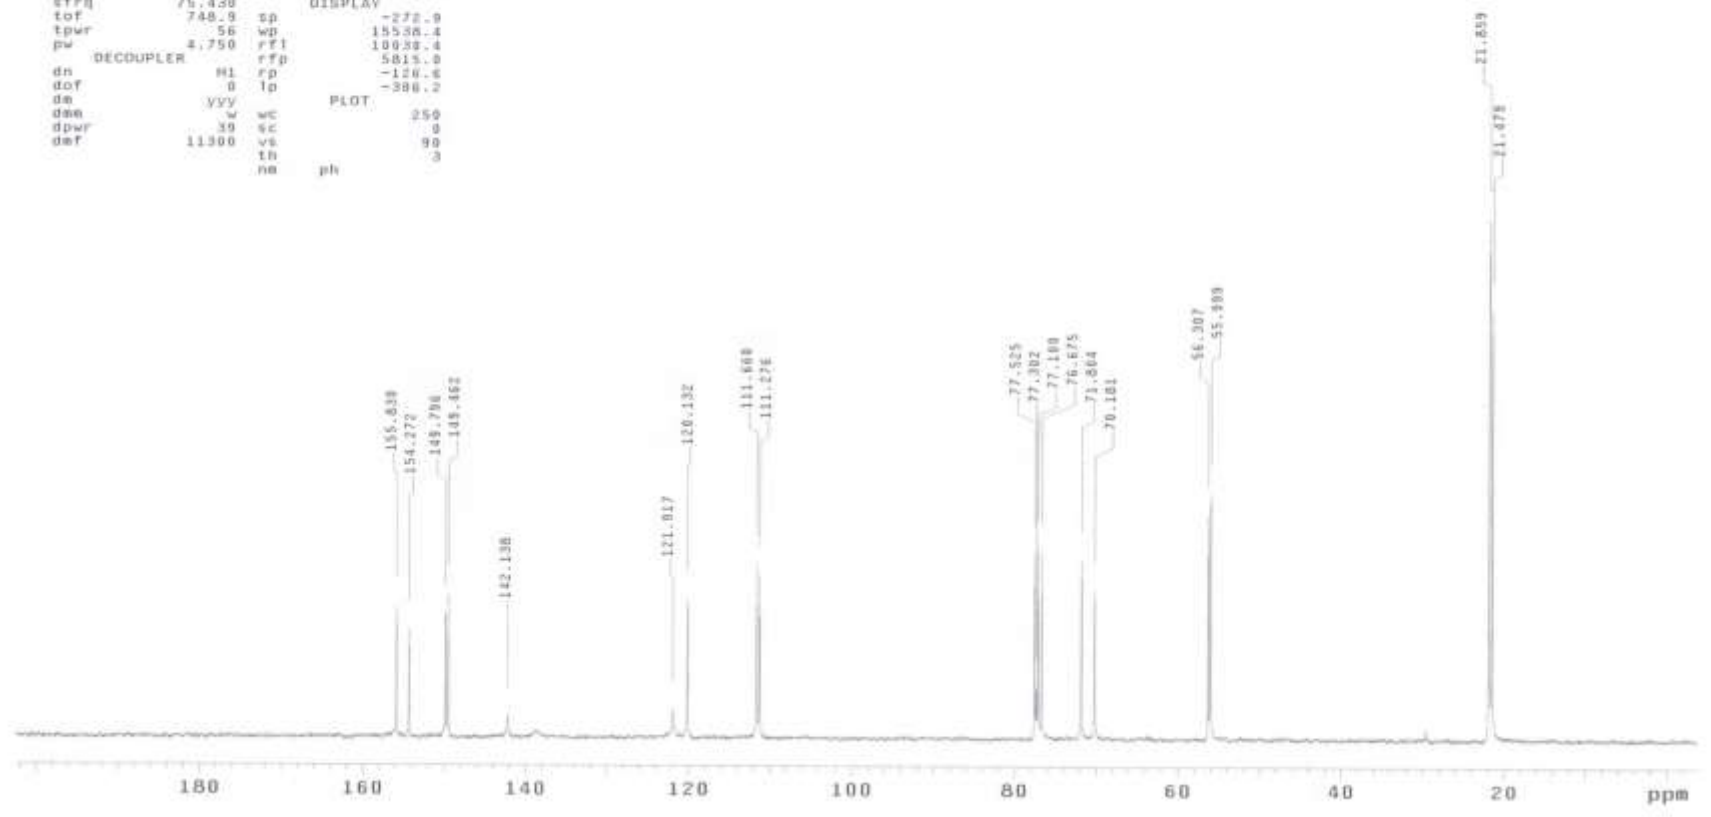

Figure S28. <sup>13</sup>C NMR Spectrum of 4e

INN-RRK-705

exp2 s2pu1

| SAMPLE      |             | DEC. & VT  |          |
|-------------|-------------|------------|----------|
| date        | Feb 18 2014 | dn         | H1       |
| solvent     | C0300       | dof        | -268.4   |
| file        | exp         | dm         | nnn      |
| ACQUISITION |             | PROCESSING |          |
| sfrq        | 299.951     | dmm        | C        |
| tn          | H1          | dmf        | 200      |
| at          | 2.000       | temp       | 50.0     |
| np          | 24022       | fn         | not used |
| sw          | 6006.0      | werr       |          |
| fb          | not used    | wexp       | 2        |
| bs          | 2           | wbs        | 3.0      |
| pw          | 3.0         | wnt        | 3.0      |
| tpwr        | 60          | DISPLAY    |          |
| dl          | 0           | sp         | -1.7     |
| tof         | 900.0       | wp         | 3605.7   |
| nt          | 800         | vs         | 155      |
| ct          | 800         | sc         | 0        |
| alock       | n           | wc         | 250      |
| gain        | 2           | hzmm       | 14.42    |
| FLACS       |             | ls         | 16301.77 |
| il          | n           | rfl        | 649.4    |
| in          | n           | rfp        | 0        |
| dp          | y           | th         | 2        |
|             |             | ins        | 1.000    |
|             |             | nm         | ph       |

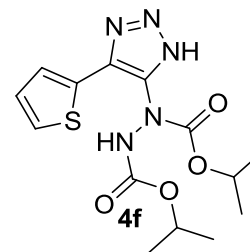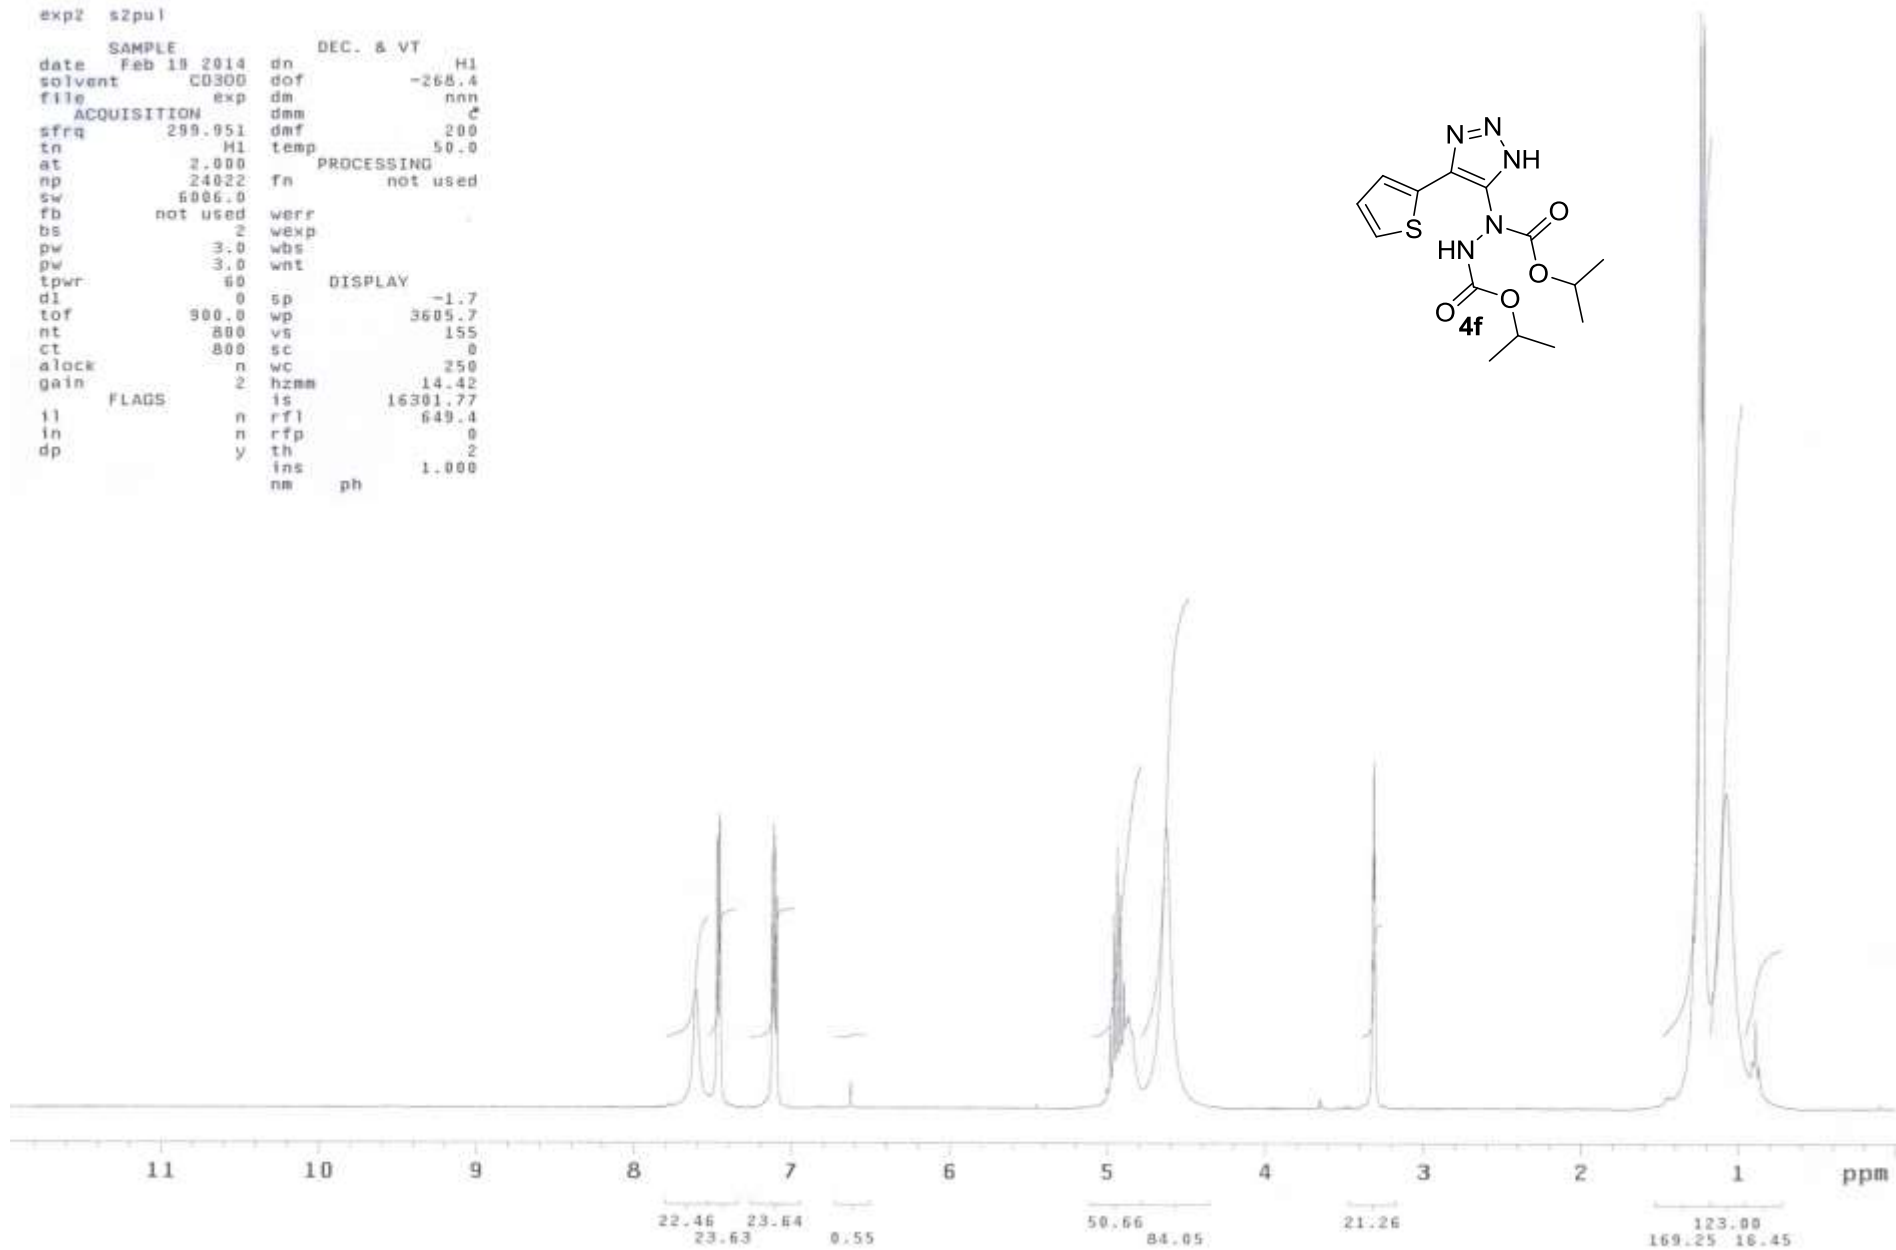

Figure S29. <sup>1</sup>H NMR Spectrum of **4f**

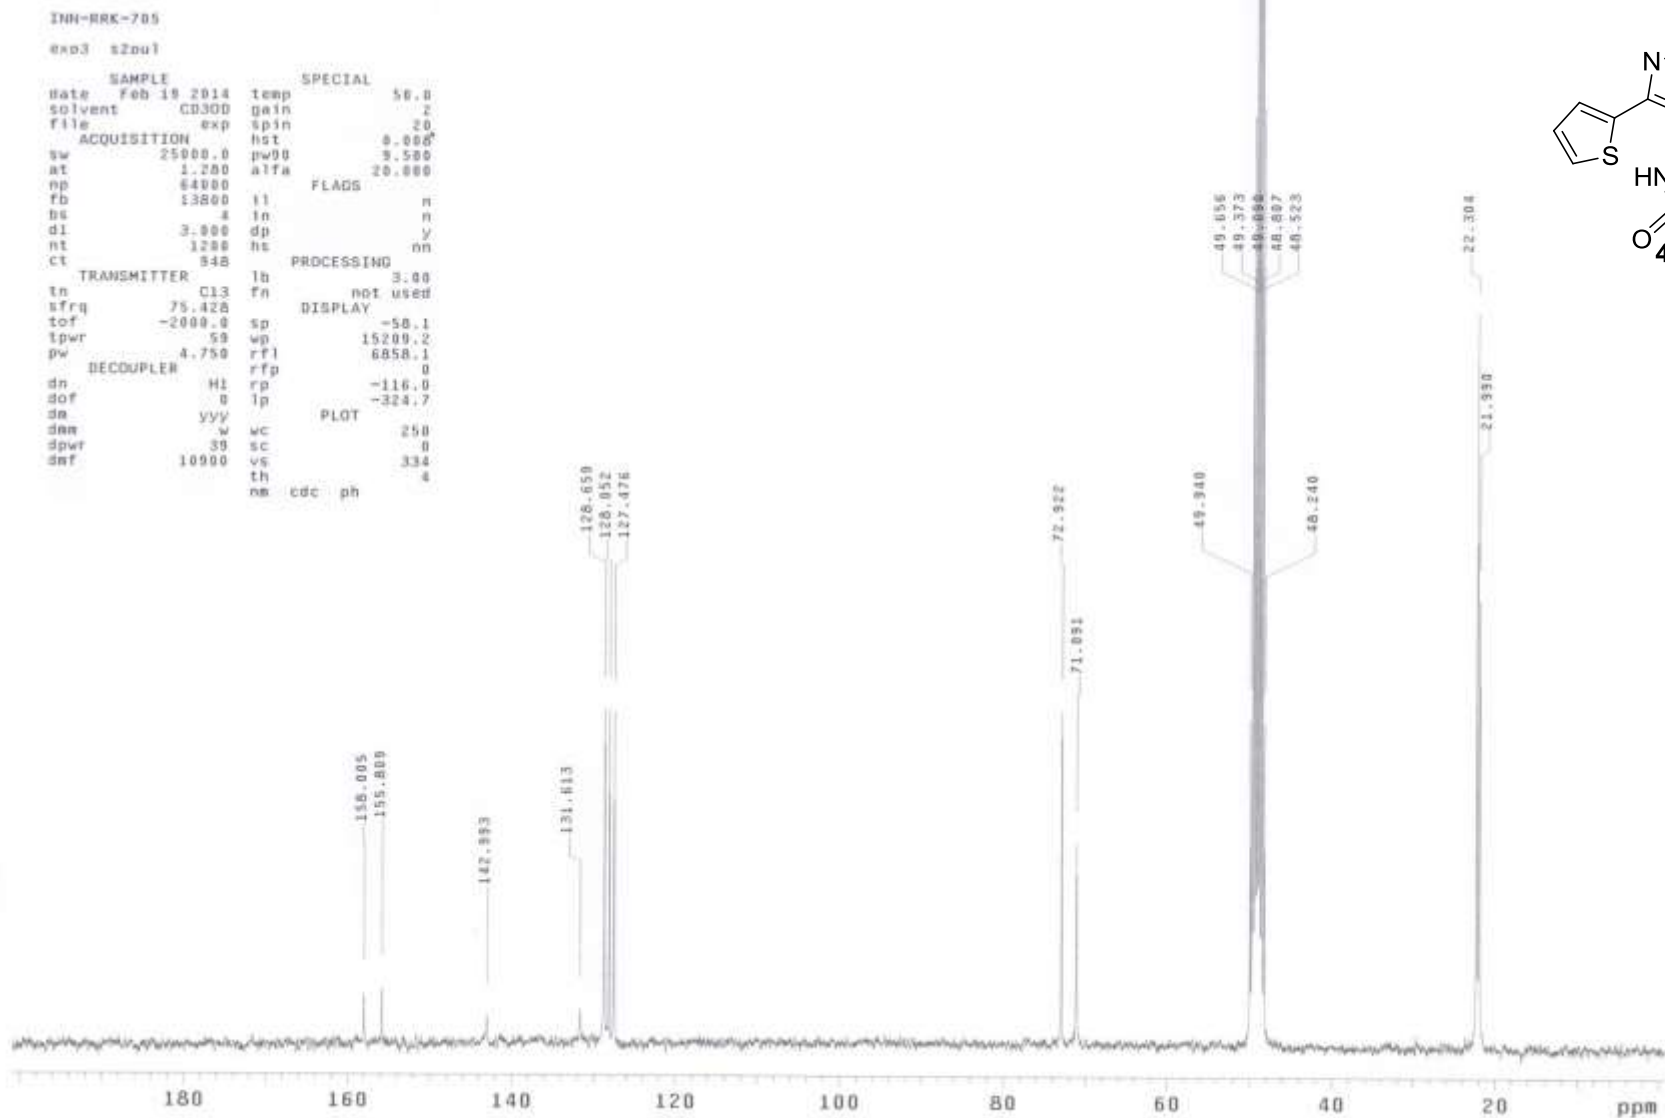

Figure S30.  $^{13}\text{C}$  NMR Spectrum of **4f**



INN-MVD-528

exp1 s2pu1

```
SAMPLE          DEC. & VT
date    May 27 2015  dn          H1
solvent  CDC13      dof          -268.4
file     /export/home/  ds
vnmr1/2015/May/Int-  dnm
ernal/INN-Mars/528-  daf
-55deg-fid  temp          55.0
ACQUISITION      PROCESSING
sfrq      299.958  lb          0.10
in         H1      fn          not used
at         1.095
np         23868  werr
sw         6006.0  wexp
fb         not used  wbs
bs         2      wnt
pw         3.0
pw         3.0  sp          DISPLAY
tpwr       60  wp          -56.1
dl         0  vs          3973.0
tof        900.0  %c          154
nt         3200  wc          0
ct         872  hzmm       250
alock      n  fs          12.29
gain       2  rfi          55259.60
          rfp          844.8
          th          0
          tm          2
          nm          1.000
          ph
```

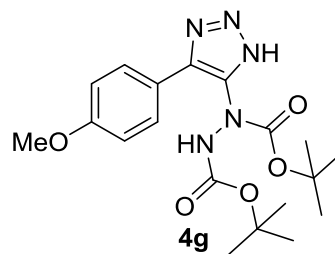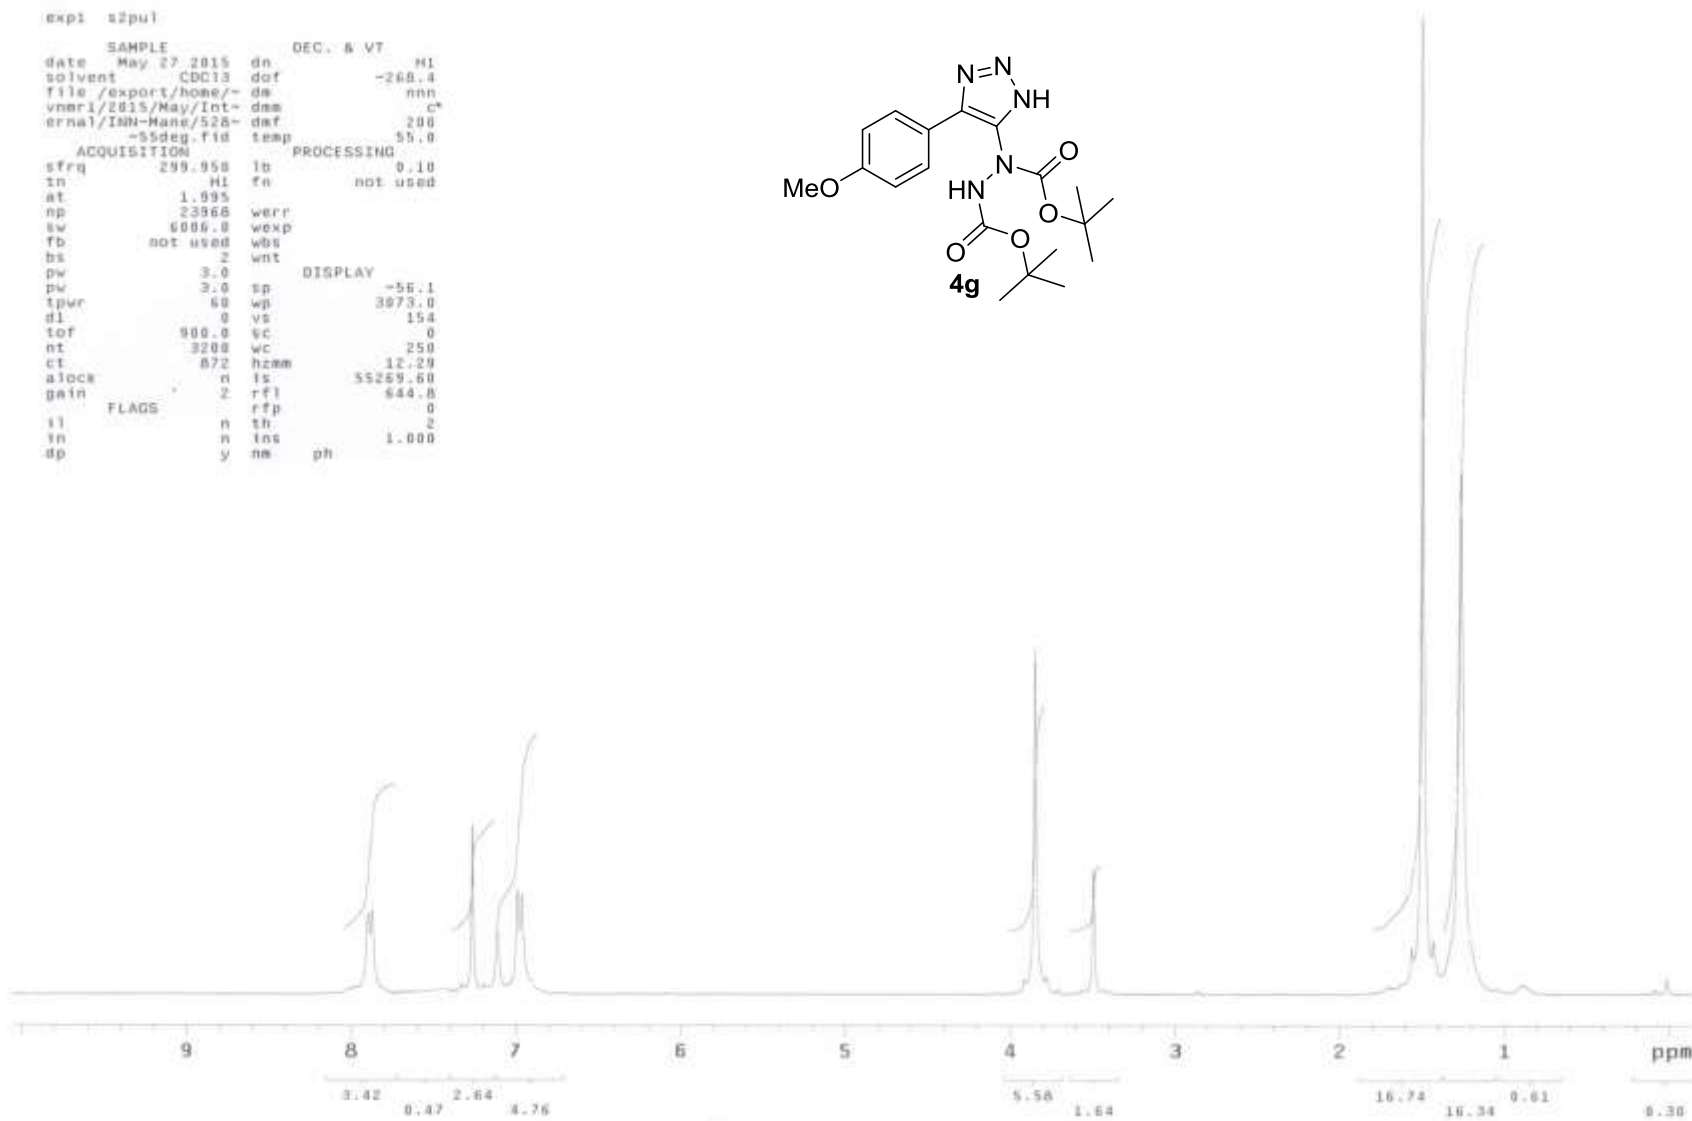

Figure S31. <sup>1</sup>H NMR Spectrum of **4g**

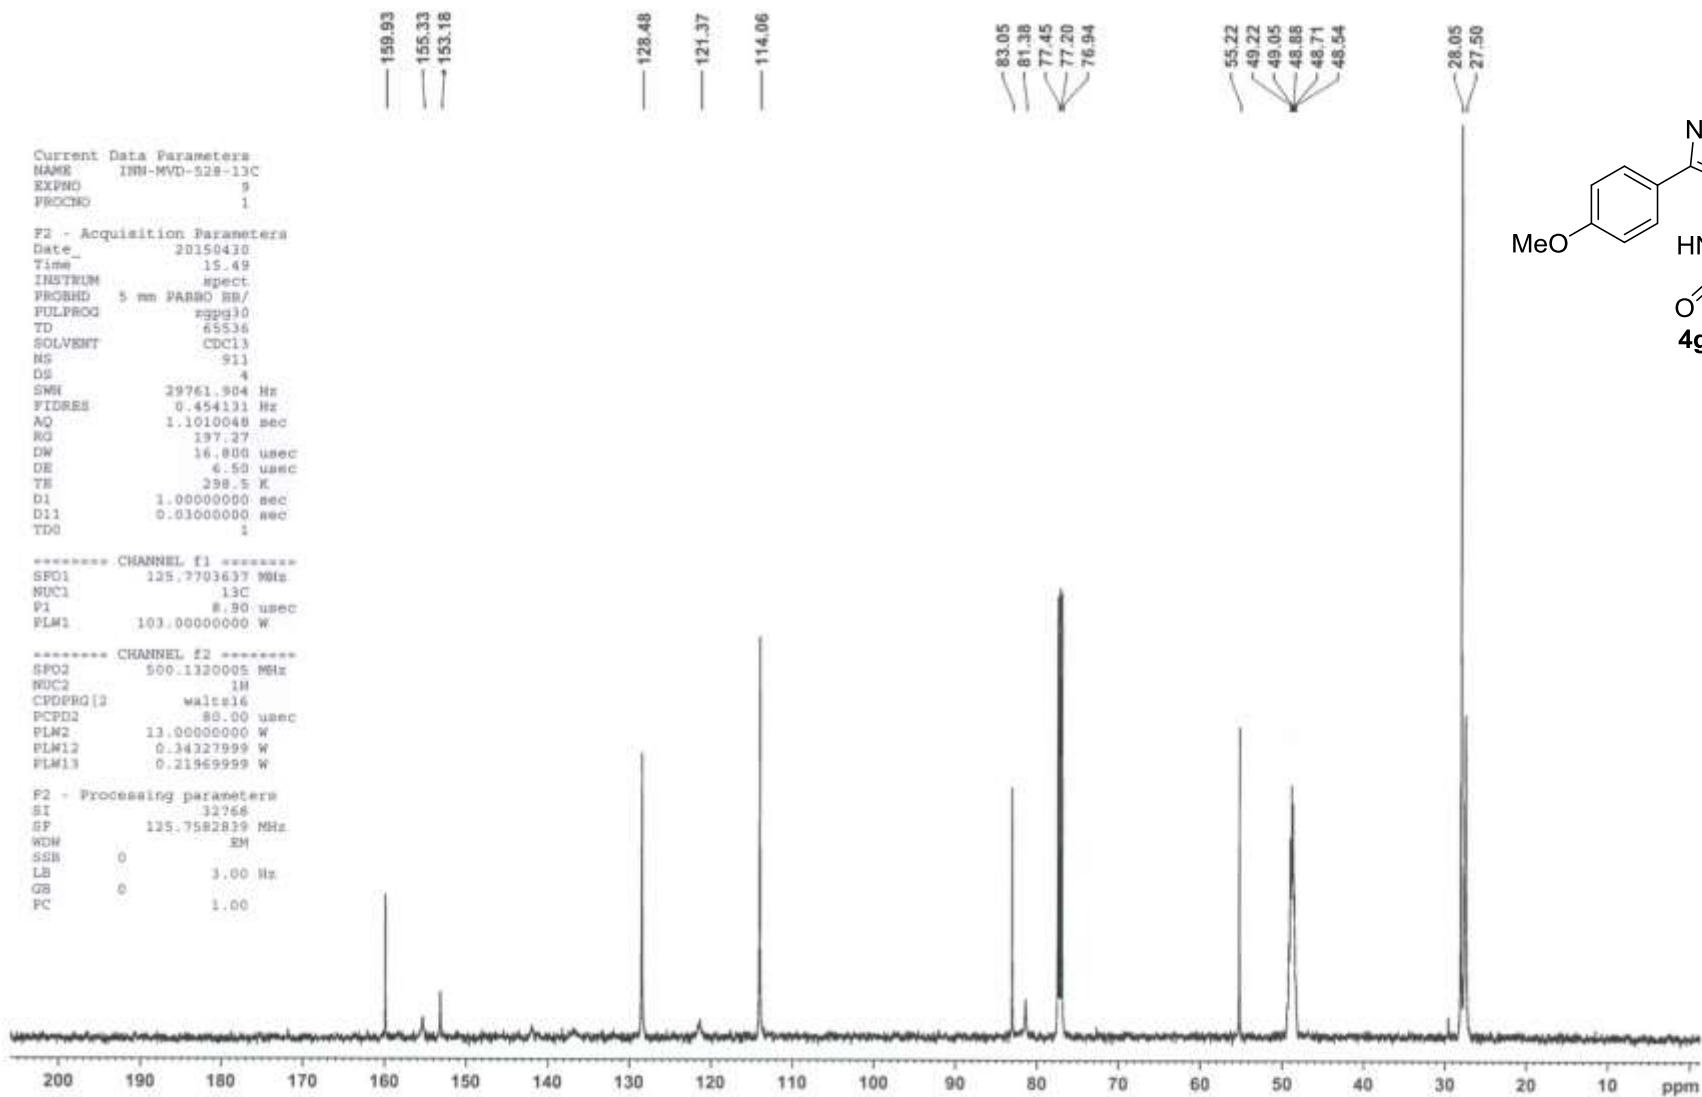

Figure S32.  $^{13}\text{C}$  NMR Spectrum of **4g**

```

Current Data Parameters
NAME      INN-MVD-166-1H
EXPNO     1
PROCNO    1

F2 - Acquisition Parameters
Date_     20131220
Time      18.03
INSTRUM   spect
PROBHD    5 mm PABBO BB/
PULPROG   zg30
TD        65536
SOLVENT   CDCl3
NS        12
DS        2
SWH       10000.000 Hz
FIDRES    0.152588 Hz
AQ        3.2767999 sec
RG        48.36
DW        50.000 usec
DE        6.50 usec
TE        295.3 K
D1        1.00000000 sec
TDO       1

```

```

----- CHANNEL f1 -----
SFO1     500.1330885 MHz
NUC1     1H
P1       13.00 usec
PLW1     13.00000000 W

```

```

F2 - Processing parameters
SI       65536
SF       500.1300116 MHz
MDW      EM
SSB      0
LB       0.30 Hz
GB       0
PC       1.00

```

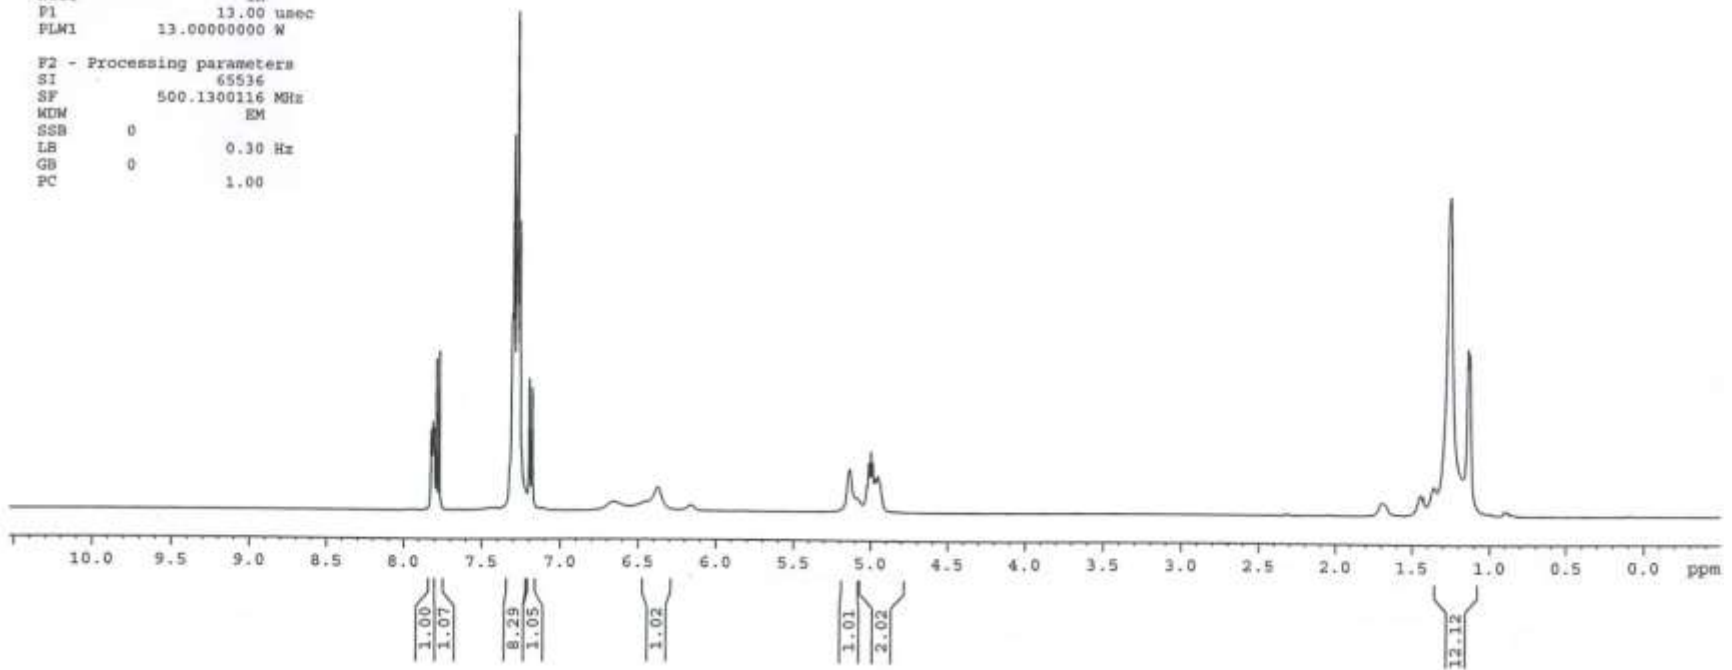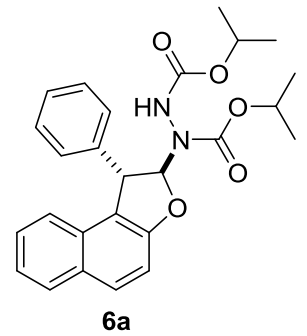

Figure S33. <sup>1</sup>H NMR Spectrum of **6a**

INN-MVD-166-13C

Current Data Parameters  
NAME INN-MVD-166-13C  
EXPNO 2  
PROCNO 1

F2 - Acquisition Parameters  
Date\_ 20131225  
Time 17.56  
INSTRUM spect  
PROBHD 5 mm PABBO BB/  
PULPROG zgpg30  
TD 65536  
SOLVENT CDCl3  
NS 509  
DS 4  
SWH 29761.904 Hz  
FIDRES 0.454131 Hz  
AQ 1.1010048 sec  
RG 197.27  
DW 16.800 usec  
DE 6.50 usec  
TE 299.9 K  
D1 1.00000000 sec  
D11 0.03000000 sec  
TDO 1

\*\*\*\*\* CHANNEL f1 \*\*\*\*\*  
SFO1 125.7703637 MHz  
NUC1 13C  
P1 8.90 usec  
PLW1 193.00000000 W

\*\*\*\*\* CHANNEL f2 \*\*\*\*\*  
SFO2 500.1320005 MHz  
NUC2 1H  
CPDPRG[2] waltz16  
PCPD2 80.00 usec  
PLW2 13.00000000 W  
PLW12 0.34327999 W  
PLW13 0.21969999 W

F2 - Processing parameters  
SI 32768  
SF 125.7577738 MHz  
WDW EM  
SSB 0  
LB 1.00 Hz  
GB 0  
PC 1.40

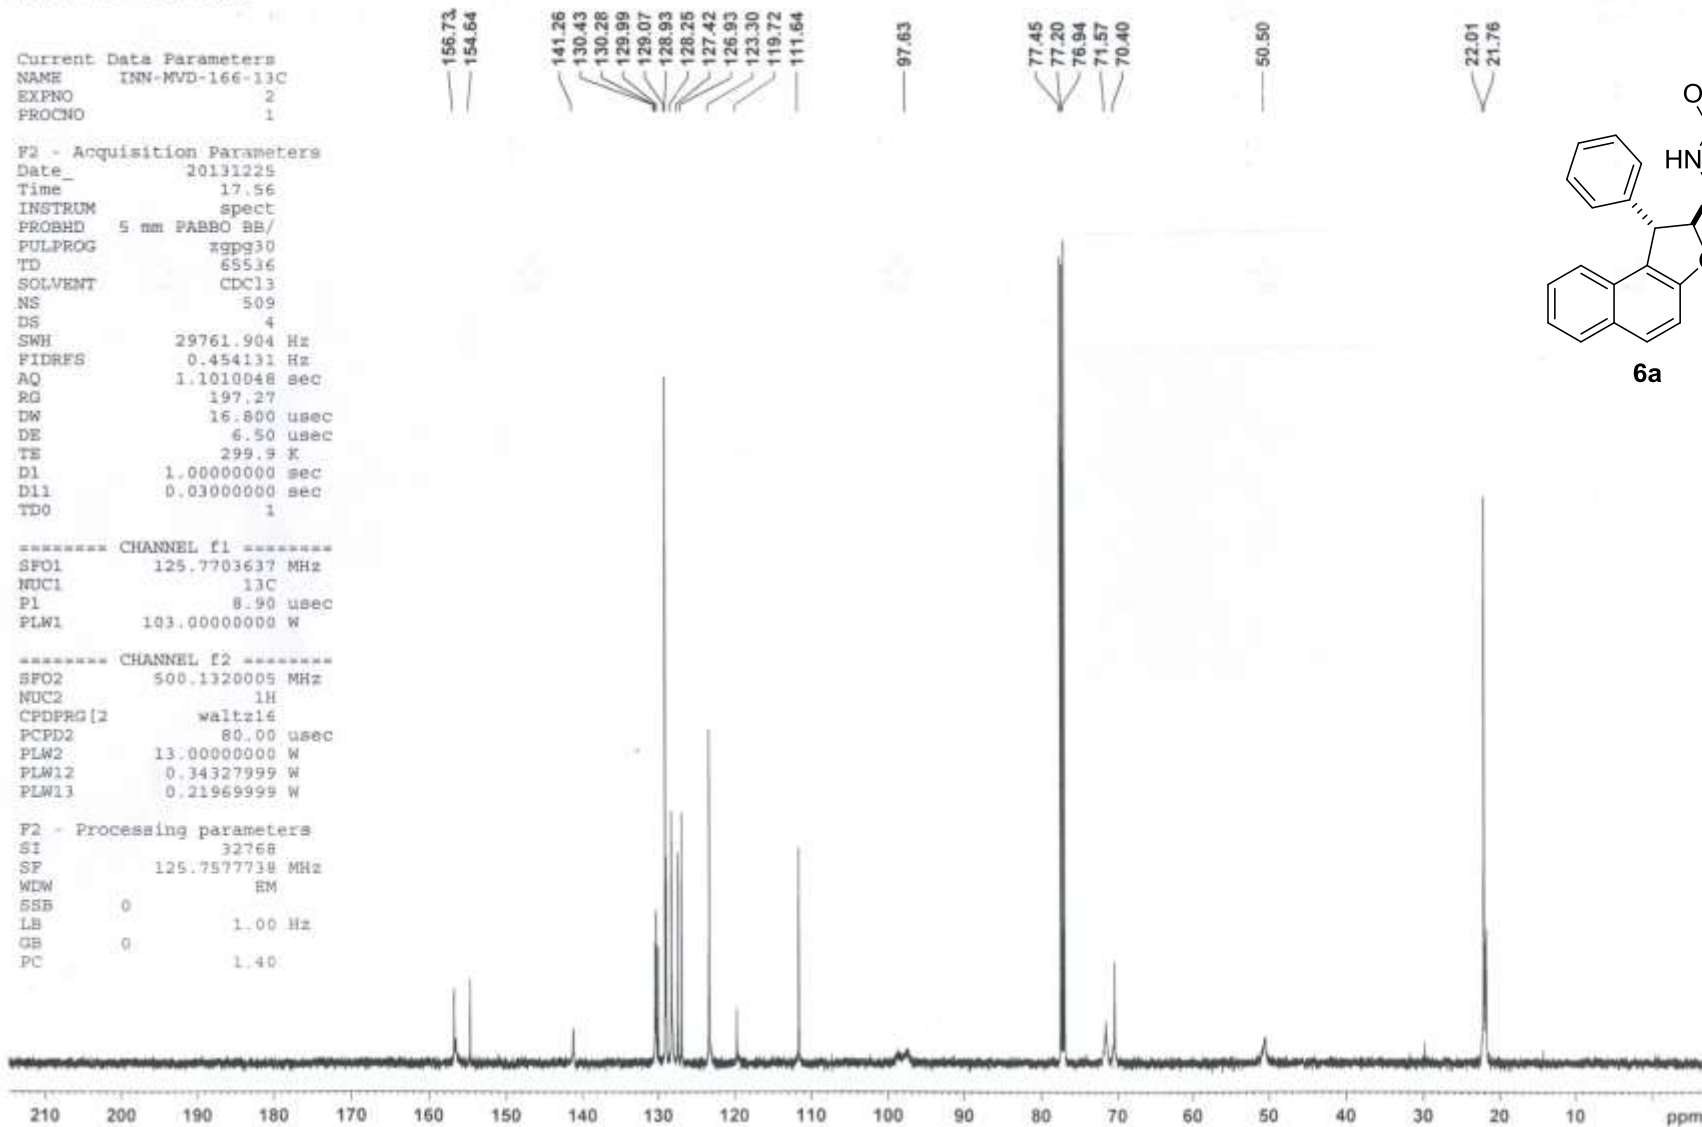

Figure S34. <sup>13</sup>C NMR Spectrum of 6a

```

Current Data Parameters
NAME      INN-MVD-164-1H
EXPNO    9
PROCNO   1

F2 - Acquisition Parameters
Date_    20131225
Time     21.30
INSTRUM  spect
PROBHD   5 mm PABBO BH/
PULPROG  zg30
TD       65536
SOLVENT  CDCl3
NS       11
DS       2
SWH      10000.000 Hz
FIDRES   0.152588 Hz
AQ       3.2767999 sec
RG       30.72
EW       50.000 usec
DK       6.50 usec
TE       296.9 K
D1       1.00000000 sec
TD0      1

***** CHANNEL f1 *****
SFO1     500.1330885 MHz
NUC1     1H
P1       13.00 usec
PLW1     13.00000000 W

F2 - Processing parameters
SI       65536
SF       500.1300000 MHz
WDW      EM
ESB      0
LB       0.30 Hz
GB       0
PC       1.00

```

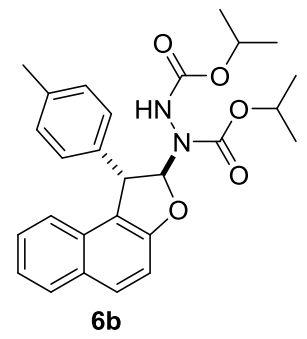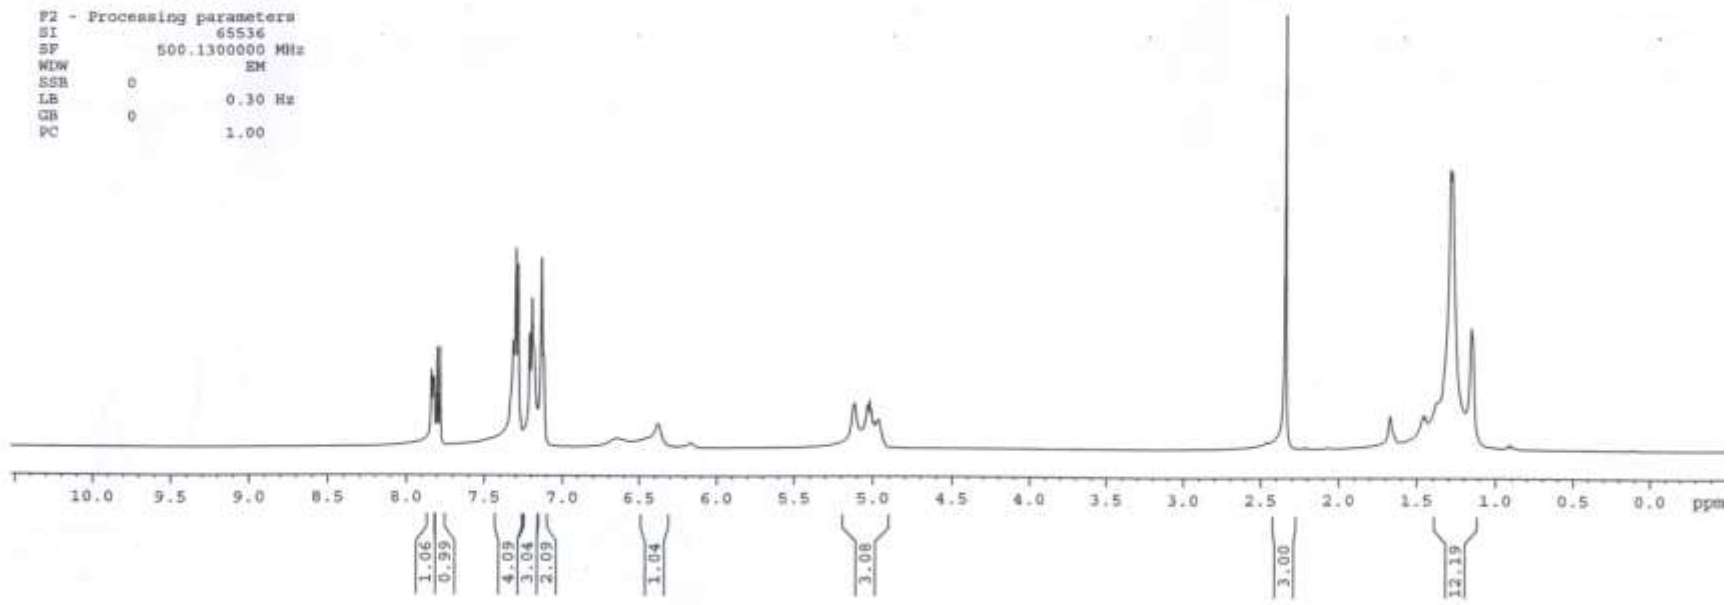

Figure S35. <sup>1</sup>H NMR Spectrum of **6b**

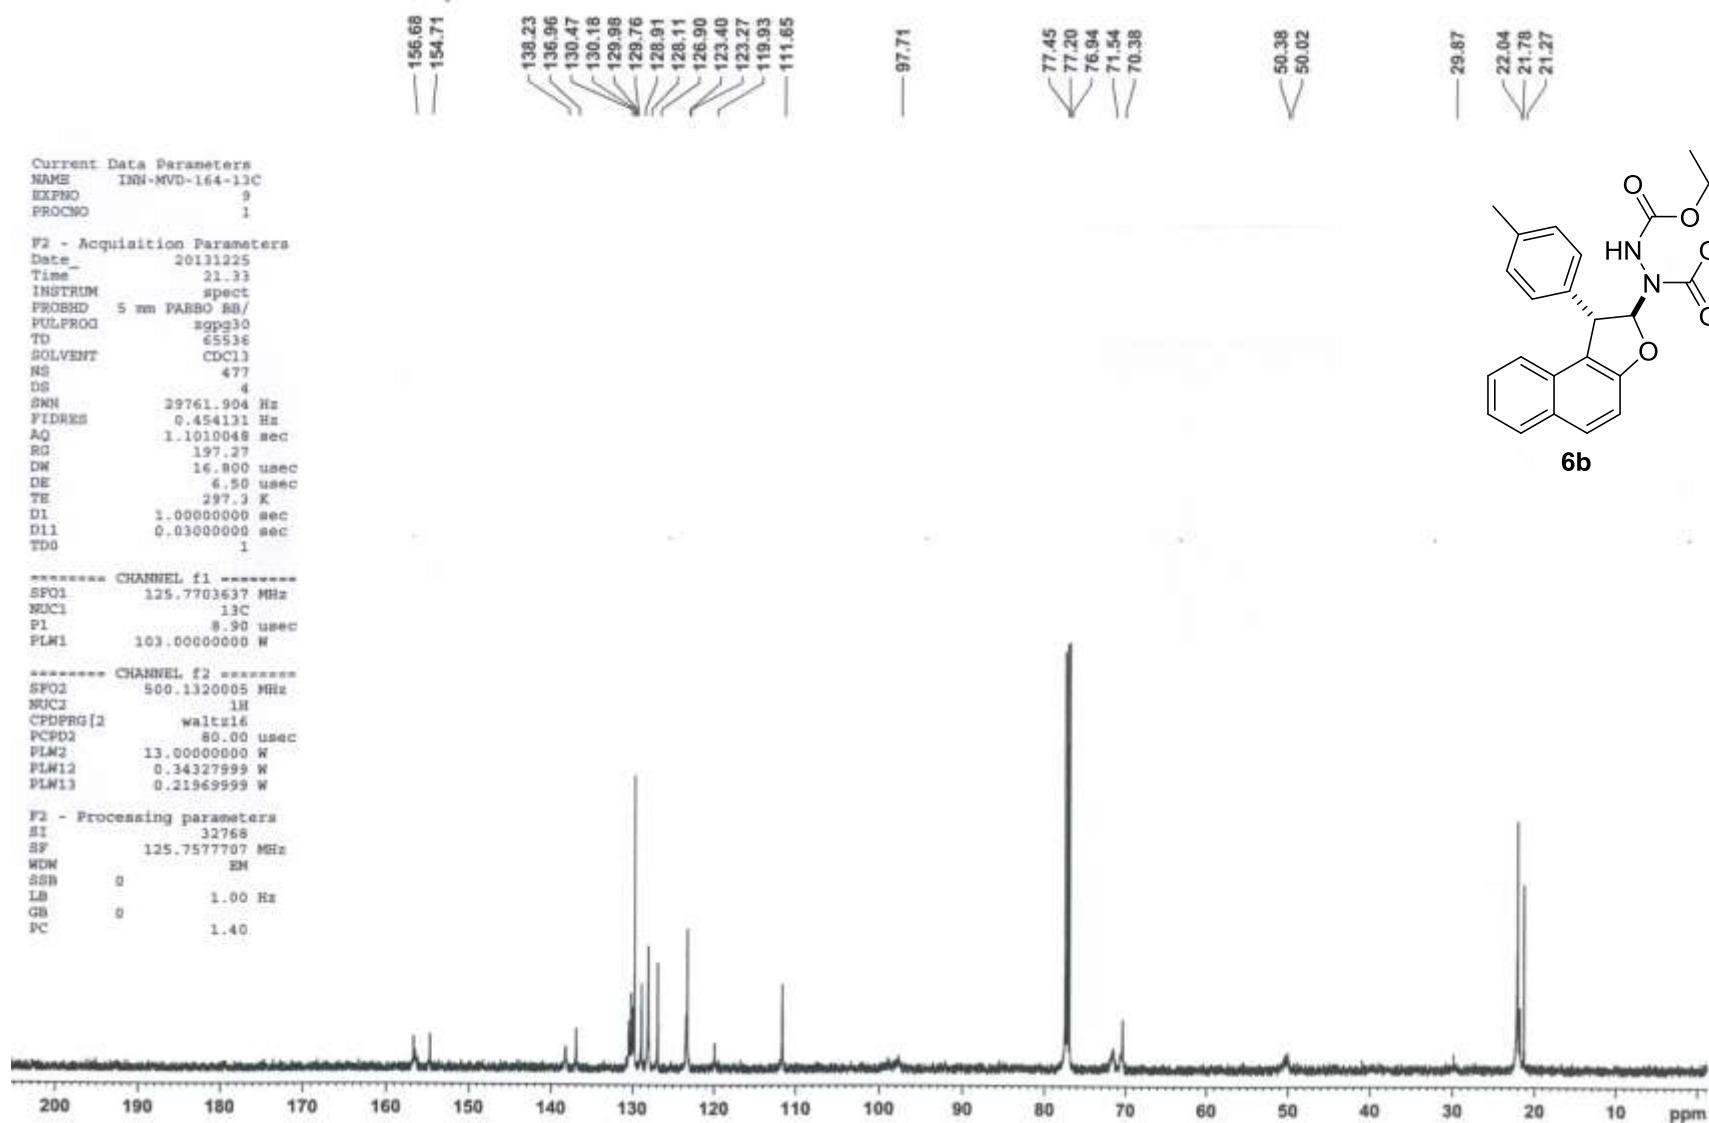

Figure S36. <sup>13</sup>C NMR Spectrum of **6b**

```

Current Data Parameters
NAME      189-MVD-191-1H
EXPNO     5
PROCNO    1

F2 - Acquisition Parameters
Date_     20140923
Time      15.21
INSTRUM   spect
PROBHD    5 mm PABBO BB/
PULPROG   zgpg30
TD         65536
SOLVENT   CDCl3
NS         12
DS         4
SWH        10000.000 Hz
FIDRES     0.152586 Hz
AQ         1.2767999 sec
RG         10.65
DM         50.000 usec
DE         6.50 usec
TE         297.1 K
D1         1.00000000 sec
D12        0.00002000 sec
D16        0.00020000 sec
YD0        1

```

```

----- CHANNEL f1 -----
SFO1      500.1330885 MHz
NUC1       1H
P1         13.00 usec
P2         26.00 usec
P12        2000.00 usec
PLNO       0 W
PLW1       13.00000000 W
SFO1A1     0.500
SFO1P1     -2144.93 Hz
SFO1W1     0.00219700 W

```

```

----- GRADIENT CHANNEL -----
GPNAM[1]   SMSQ10.100
GPNAM[2]   SMSQ10.100
GPE1       31.00 %
GPE2       11.00 %
P16         1000.00 usec

```

```

F2 - Processing parameters
SI          65536
SF          500.1300245 MHz
WMW         RM
SBB         0
LB          0.30 Hz
GB          0
PC          1.00

```

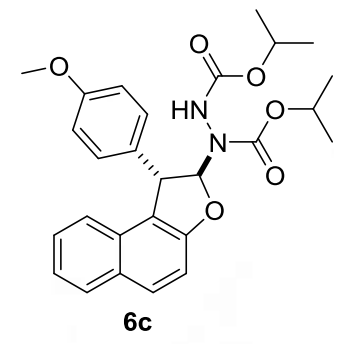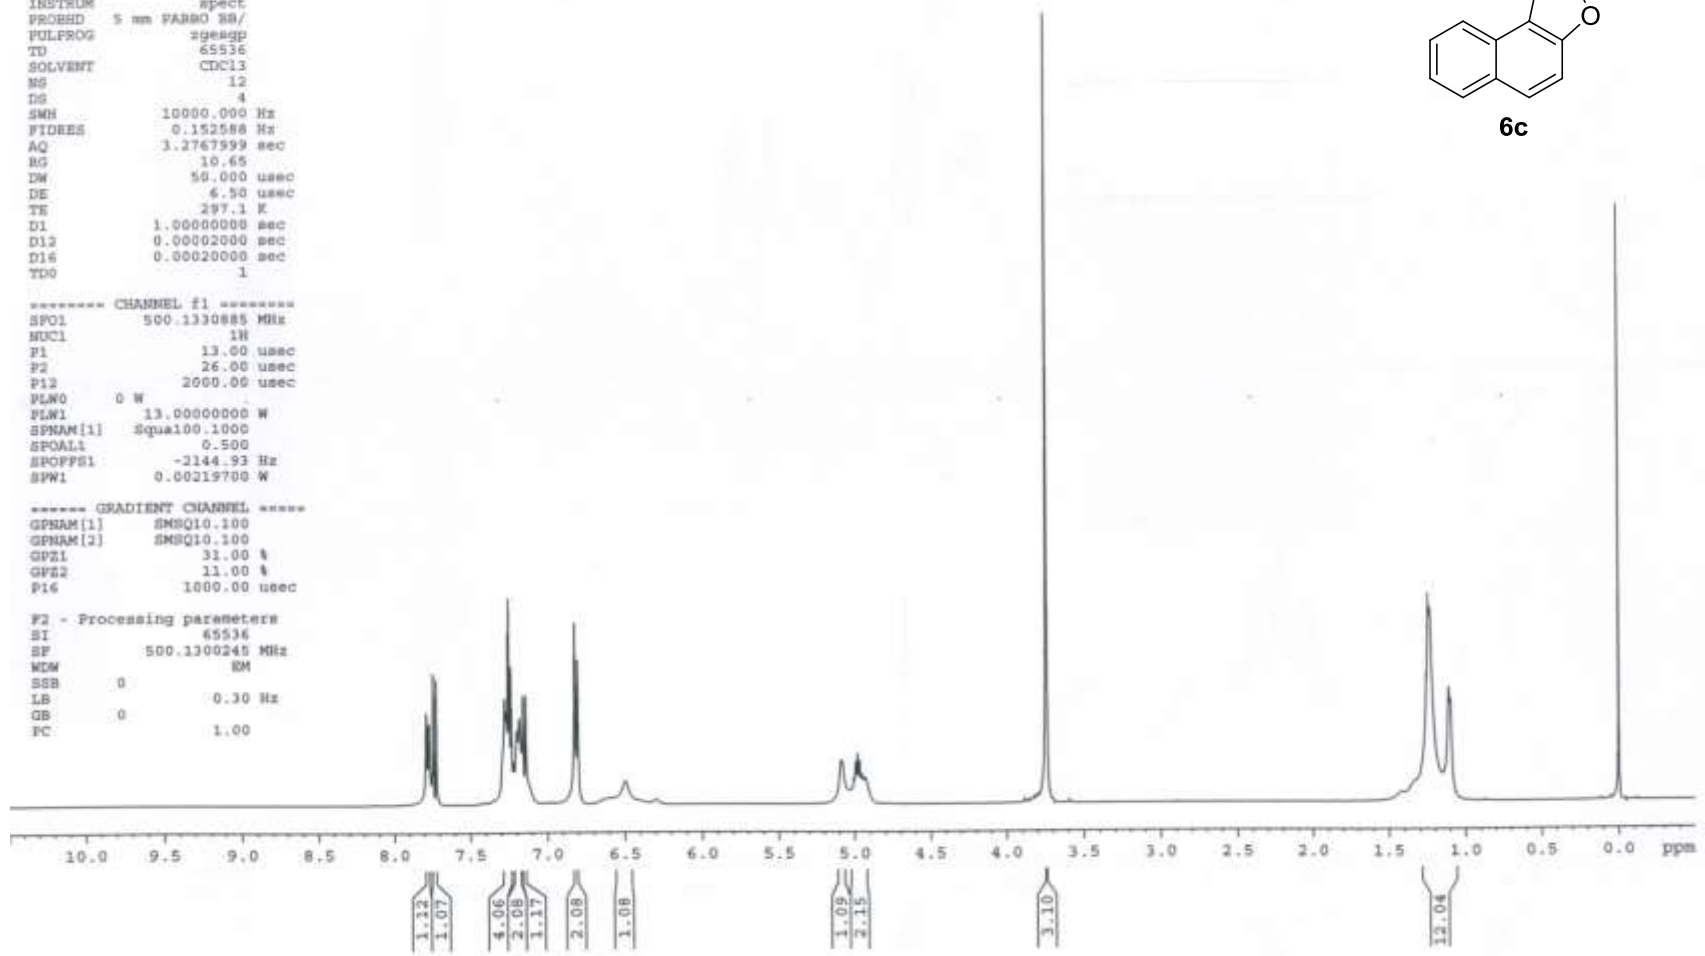

Figure S37. <sup>1</sup>H NMR Spectrum of **6c**

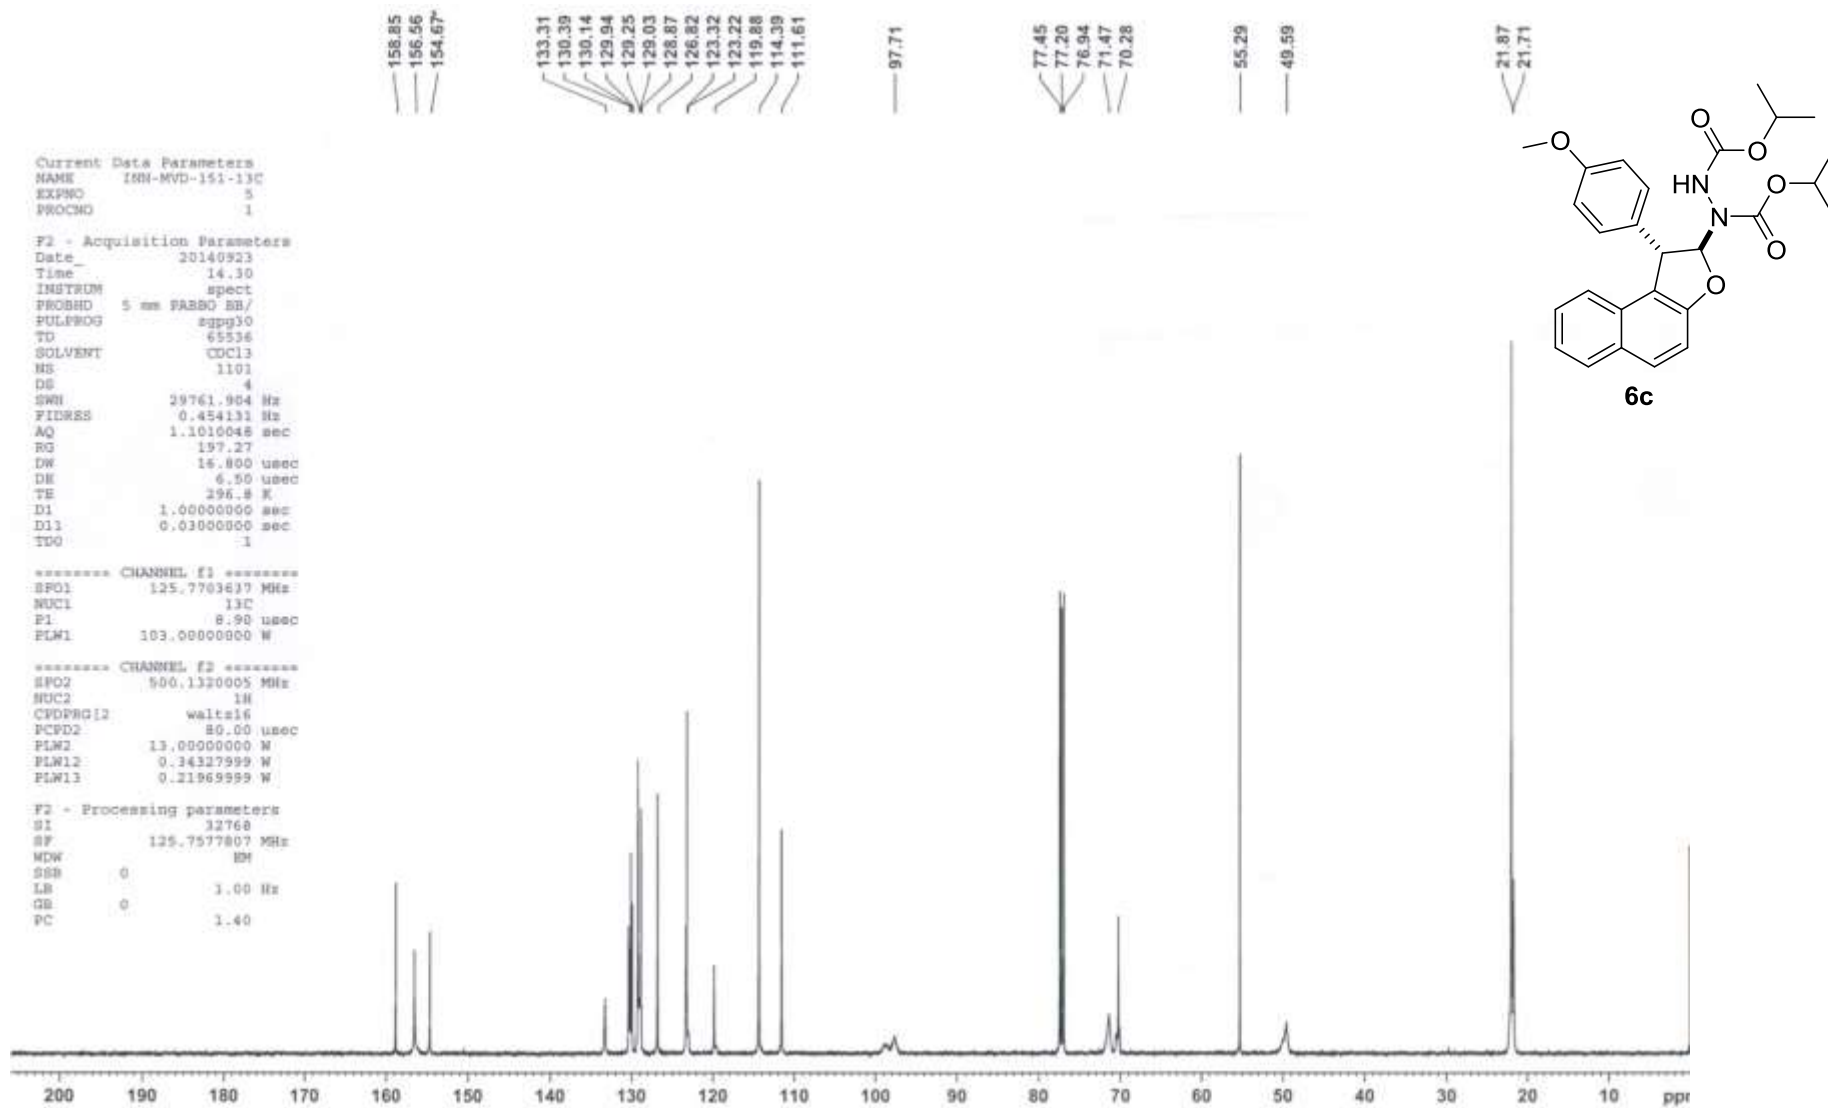

Figure S38. <sup>13</sup>C NMR Spectrum of **6c**



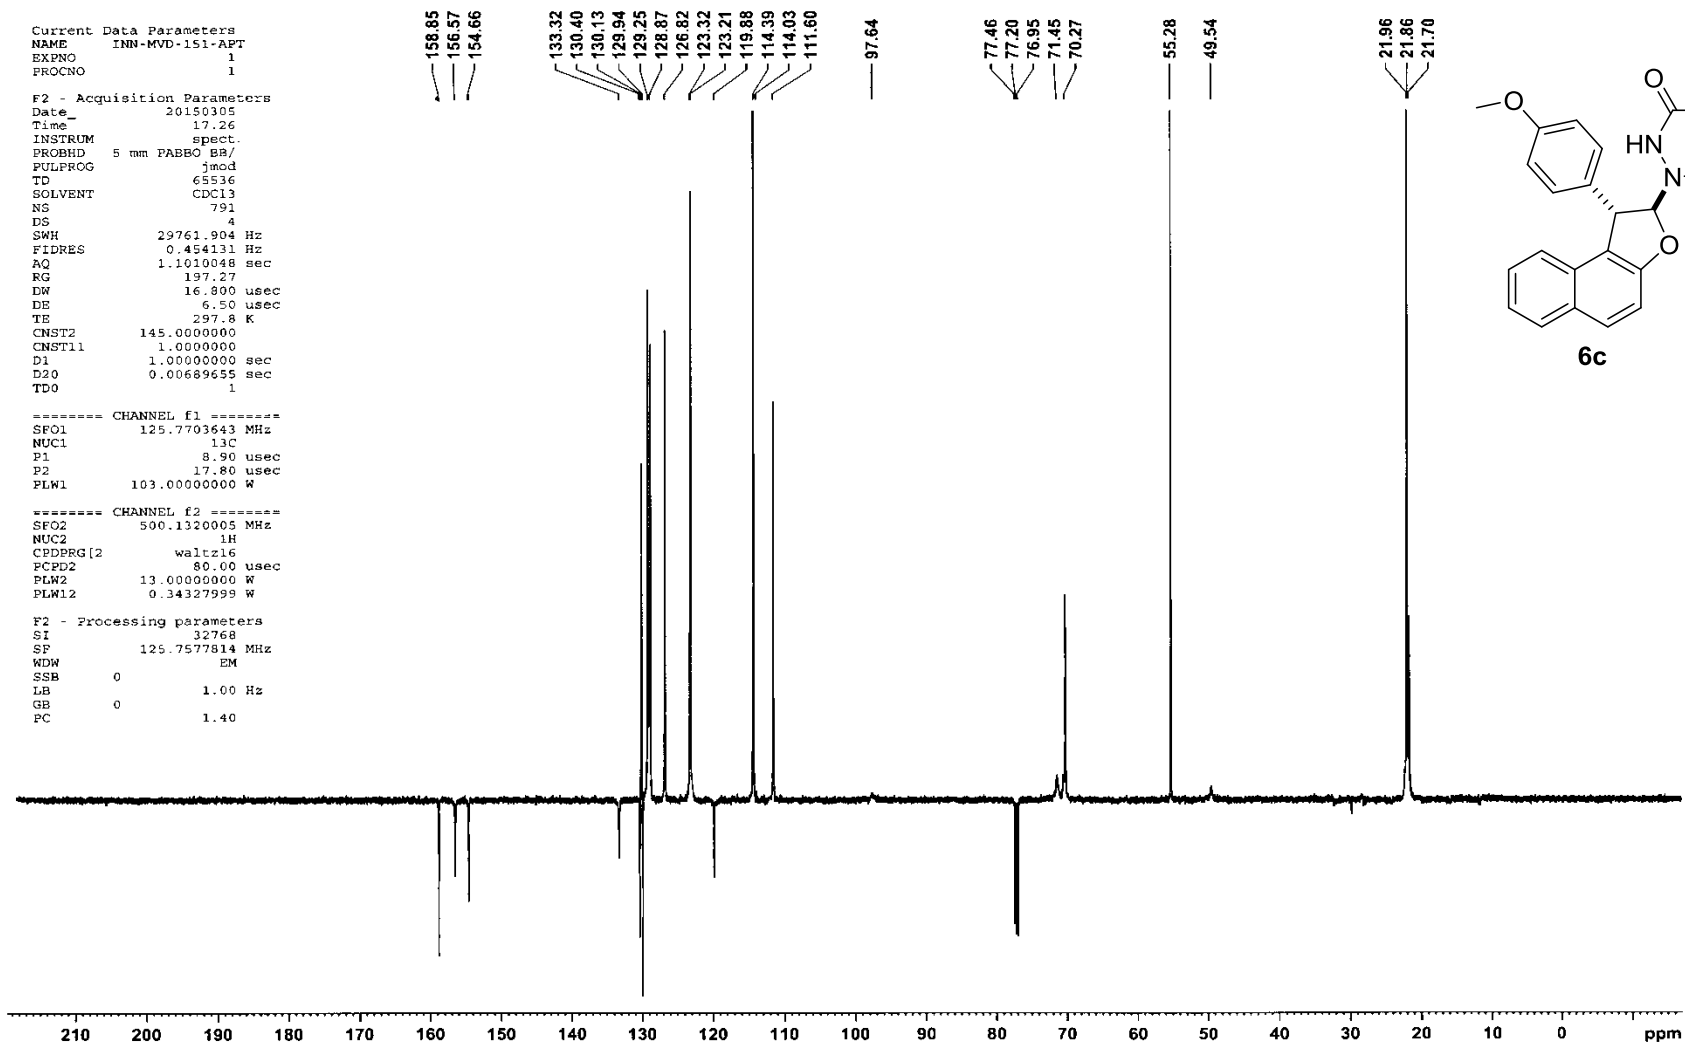

Figure S39. <sup>13</sup>C-APT NMR Spectrum of **6c**

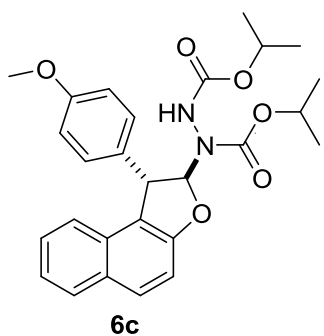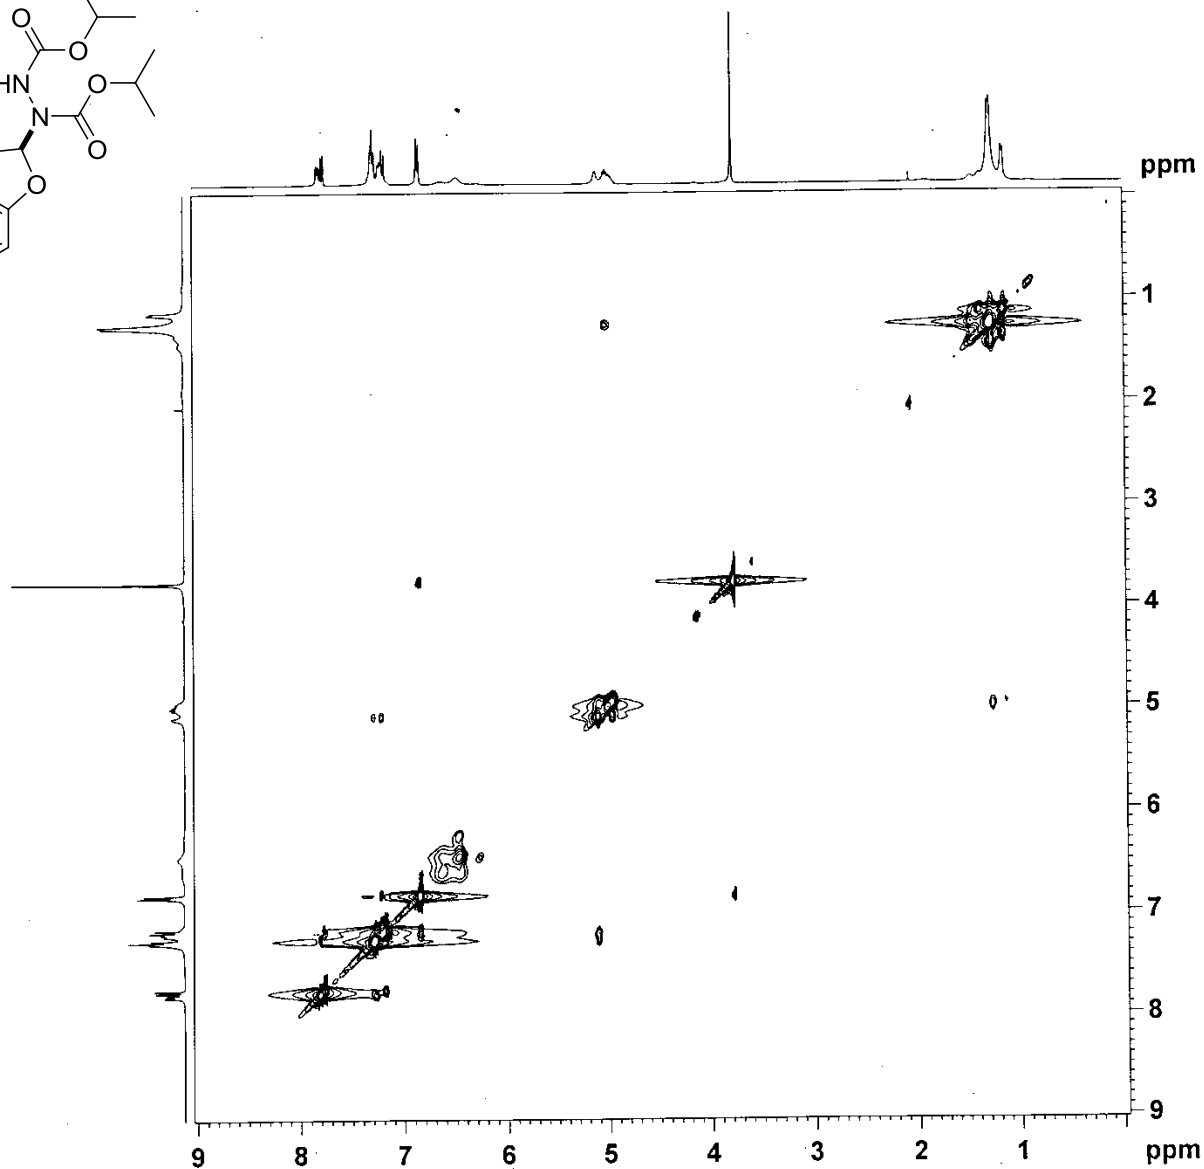

Current Data Parameters  
 NAME INN-MVD-151-NOESY  
 EXPNO 7  
 PROCNO 1

F2 - Acquisition Parameters  
 Date\_ 20151203  
 Time\_ 17.45  
 INSTRUM spect  
 PROBHD 5 mm SEI 1H/D-  
 PULPROG noesyph  
 TD 2048  
 SOLVENT CDC13  
 NS 32  
 DS 16  
 SWH 3633.721 Hz  
 FIDRES 1.774278 Hz  
 AQ 0.2818048 sec  
 RG 50.8  
 DW 137.600 usec  
 DE 6.50 usec  
 TE 295.6 K  
 D0 0.00012901 sec  
 D1 1.90374398 sec  
 D8 0.60000002 sec  
 IN0 0.00027520 sec

===== CHANNEL f1 =====  
 NUC1 1H  
 P1 6.75 usec  
 PL1 -3.00 dB  
 PL1W 16.73965454 W  
 SFO1 400.1318090 MHz

F1 - Acquisition parameters  
 TD 324  
 SFO1 400.1318 MHz  
 FIDRES 11.215176 Hz  
 SW 9.081 ppm  
 FnMODE States-TPPI

F2 - Processing parameters  
 SI 2048  
 SF 400.1300095 MHz  
 WDW QSINE  
 SSB 2  
 LB 0 Hz  
 GB 0  
 PC 1.00

F1 - Processing parameters  
 SI 512  
 MC2 States-TPPI  
 SF 400.1300095 MHz  
 WDW QSINE  
 SSB 2  
 LB 0 Hz  
 GB 0

Figure S40.  $^1\text{H}$ - $^1\text{HNOESY}$  NMR Spectrum of **6c**

Current Data Parameters  
 NAME INN-MVD-157-1H  
 KXPNO 5  
 PROCNO 1

F2 - Acquisition Parameters  
 Date\_ 20140921  
 Time 17.25  
 INSTRUM spect  
 PROBHD 5 mm FAPBO BB/  
 PULPROG zg30  
 TD 65536  
 SOLVENT CDCl3  
 NS 20  
 DS 2  
 SWH 10000.000 Hz  
 FIDRES 0.152588 Hz  
 AQ 3.2767999 sec  
 RG 30.72  
 DR 50.000 usec  
 DE 6.50 usec  
 TE 298.5 K  
 DI 1.00000000 sec  
 TDO 1

----- CHANNEL f1 -----  
 SFO1 500.1330885 MHz  
 NUC1 1H  
 P1 13.00 usec  
 PLW1 13.00000000 W

F2 - Processing parameters  
 SI 65536  
 SF 500.1300053 MHz  
 WDW EM  
 SSB 0  
 LB 0.30 Hz  
 GB 0  
 PC 1.00

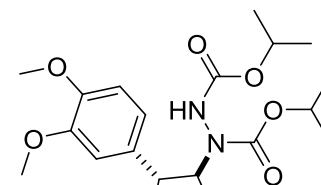

**6d**

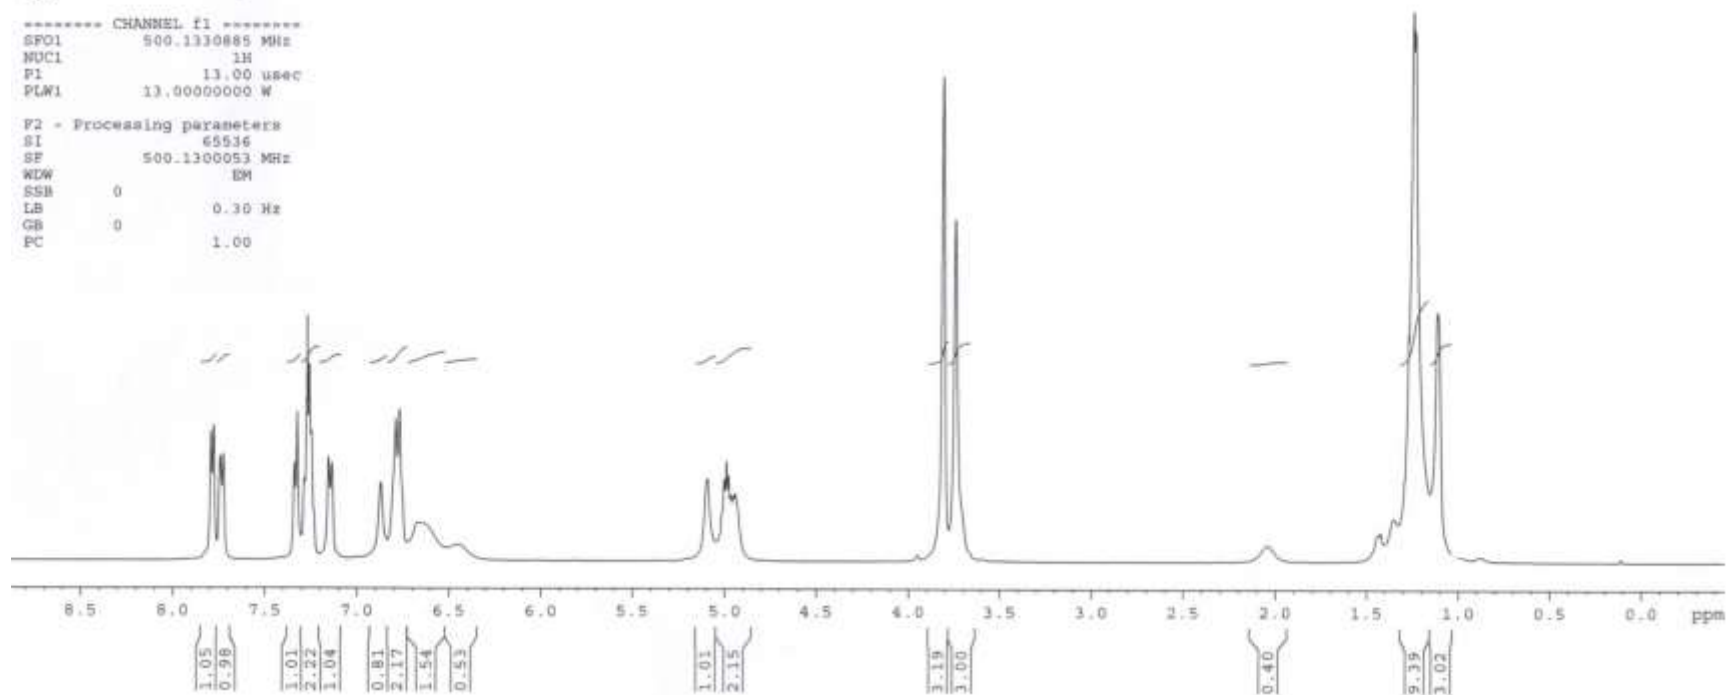

Figure S41. <sup>1</sup>H NMR Spectrum of **6d**

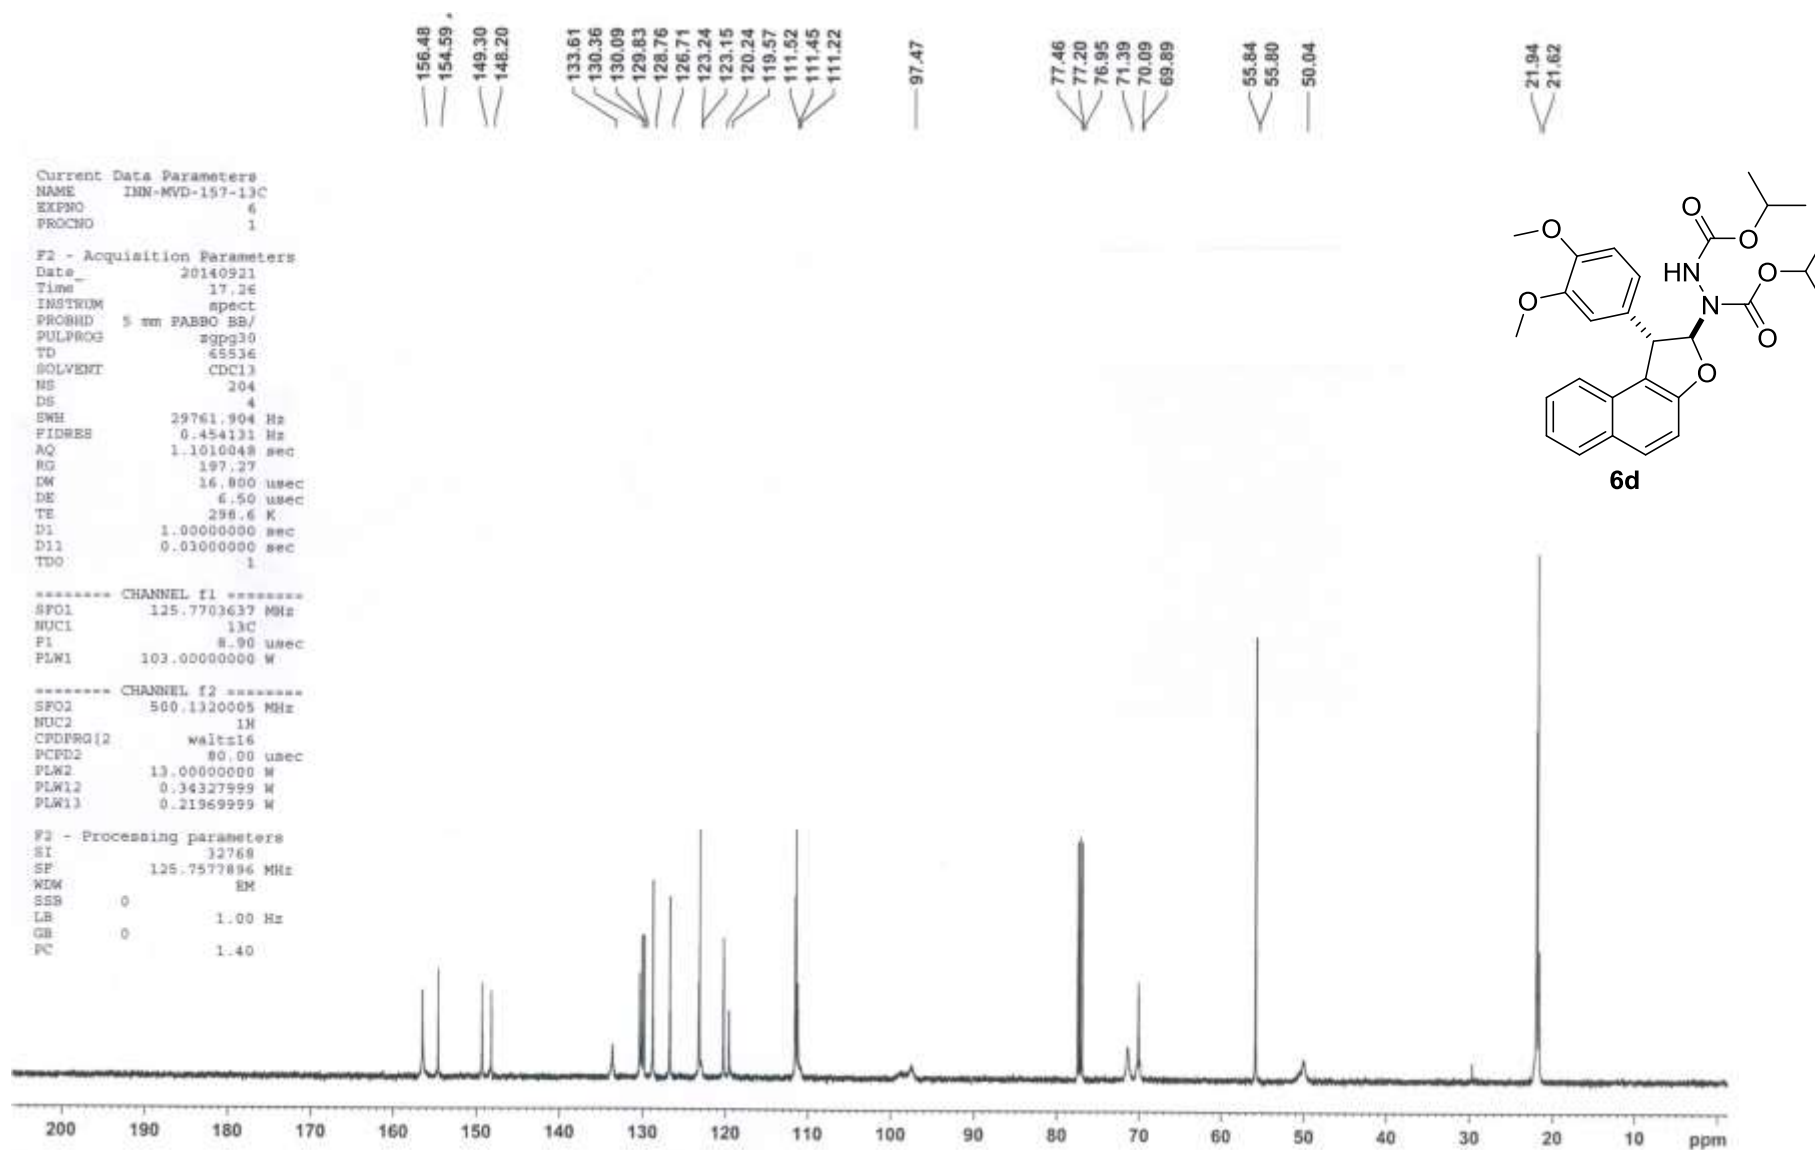

Figure S42. <sup>13</sup>C NMR Spectrum of **6d**

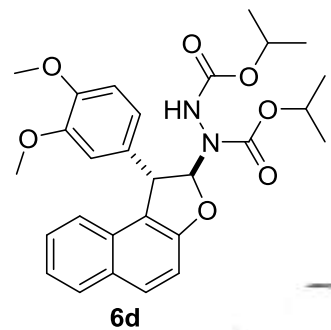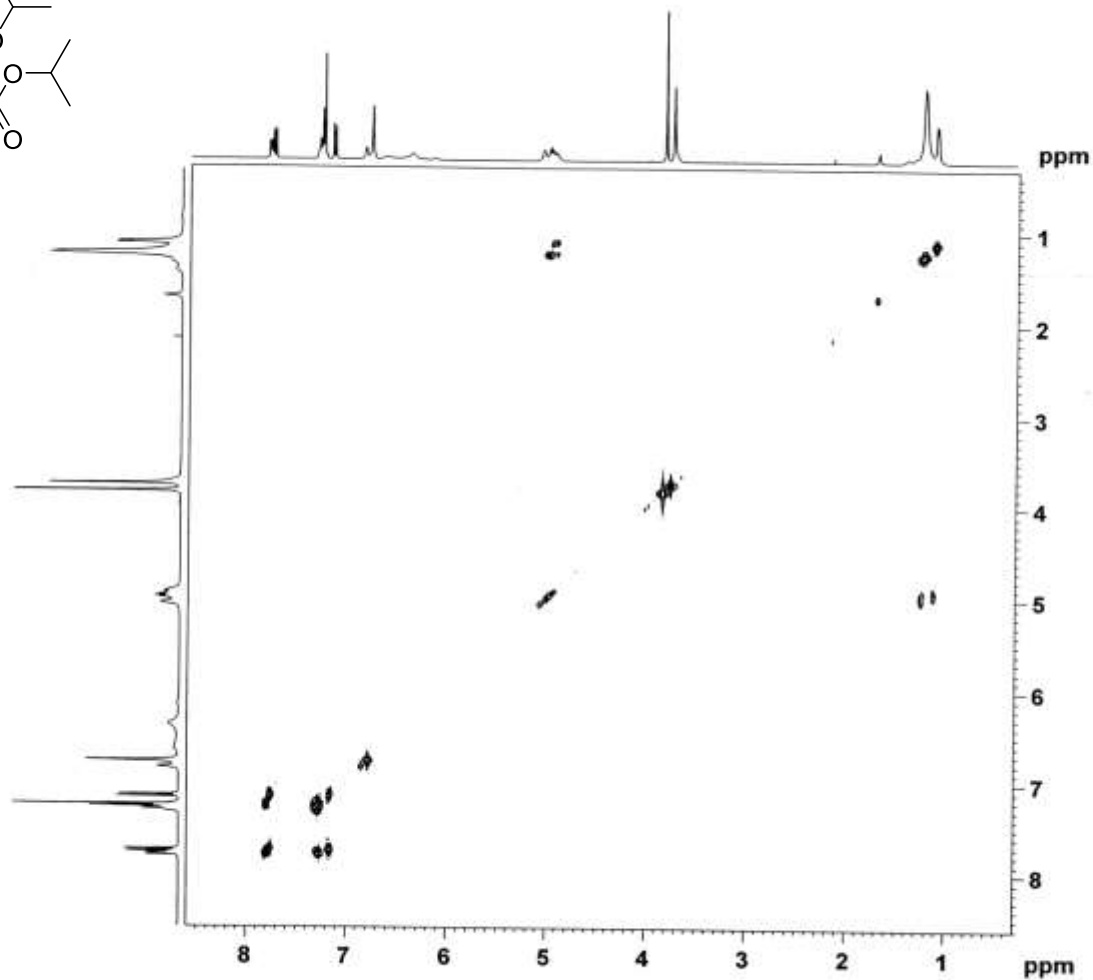

```

NAME      INN-MVD-157-cosy
EXPNO     2
PROCNO    1
Date_     20140101
Time      16.45
INSTRUM   spect
PROBHD    5 mm SSI 1H/D-
PULPROG   cosygpczf
TD         2048
SOLVENT   CDCl3
NS         4
DS         16
SWH        3318.584 Hz
FIDRES     1.620402 Hz
AQ         0.3086153 sec
RG         32
DW         150.667 usec
DE         6.50 usec
TE         295.5 K
D0         0.00000300 sec
D1         1.00000000 sec
D13        0.00000400 sec
D16        0.00020000 sec
INO        0.00030110 sec

----- CHANNEL f1 -----
NUC1       1H
P0         6.75 usec
P1         6.75 usec
PL1        -3.00 dB
PL1W       16.73965454 W
SFO1       400.1317914 MHz

----- GRADIENT CHANNEL -----
GPNAM1     SINE.100
GPZ1       10.00 %
P16        1000.00 usec
NDO        1
TD         129
SFO1       400.1318 MHz
FIDRES     25.744913 Hz
SW         8.300 ppm
F0MODE     QF
SI         2048
SF         400.1300098 MHz
WDW        SINE
SSB        0
LB         0.00 Hz
GB         0
PC         1.40
SI         512
MC2        QF
SF         400.1300098 MHz
WDW        SINE
SSB        0
LB         0.00 Hz
GB         0

```

Figure S43.  $^1\text{H}$ - $^1\text{H}$  COSY NMR Spectrum of **6d**

```

Current Data Parameters
NAME      INN-MVD-163-1H
EXPNO    2
PROCNO    1

F2 - Acquisition Parameters
Date_     20140923
Time      13.28
INSTRUM   spect
PROBHD    5 mm PABBO BB/
PULPROG   zg30
TD        65536
SOLVENT   CDCl3
NS         20
DS         2
SFO1      10000.000 Hz
FIDRES    0.152588 Hz
AQ         3.2767999 sec
RG         30.72
DW         50.000 usec
DE         6.50 usec
TE         296.1 K
D1         1.00000000 sec
TDO        1

```

```

***** CHANNEL f1 *****
SFO1      500.1330885 MHz
NUC1       1H
P1         13.00 usec
PLW1      13.00000000 W

```

```

F2 - Processing parameters
SI         65536
SF         500.1300119 MHz
WDW        EM
SSB        0
LB         0.30 Hz
GB         0
PC         1.00

```

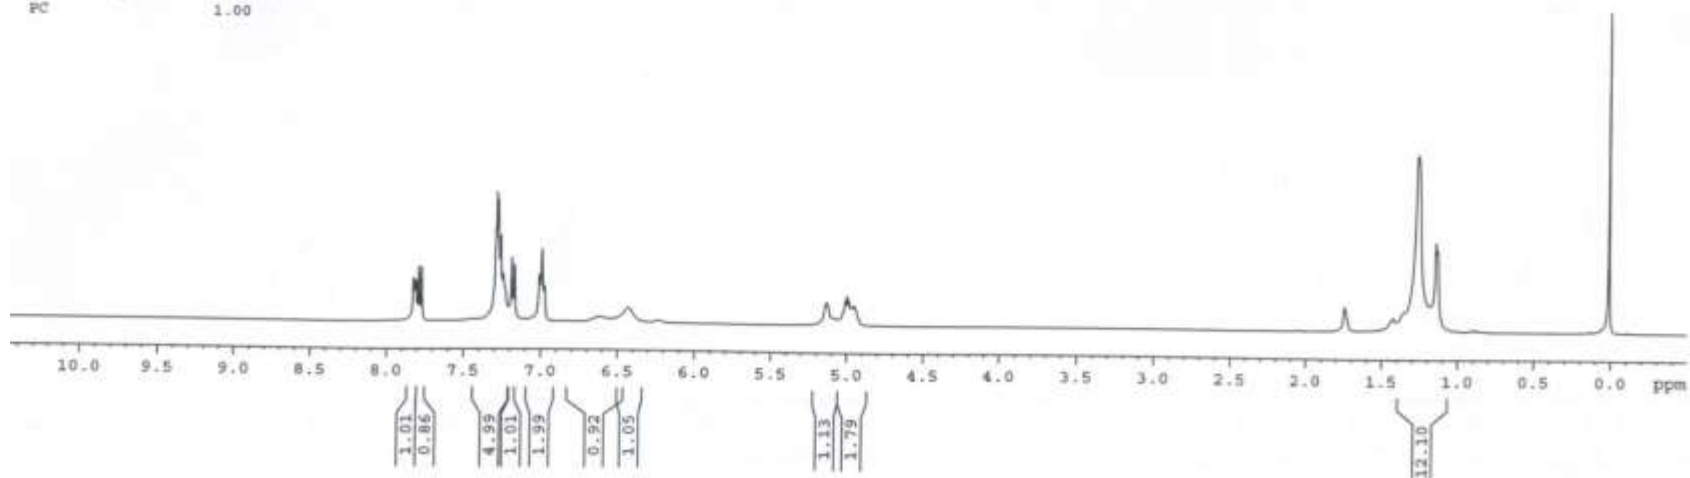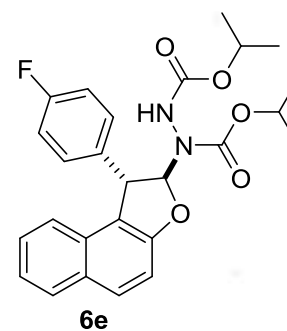

Figure S44. <sup>1</sup>H NMR Spectrum of **6e**

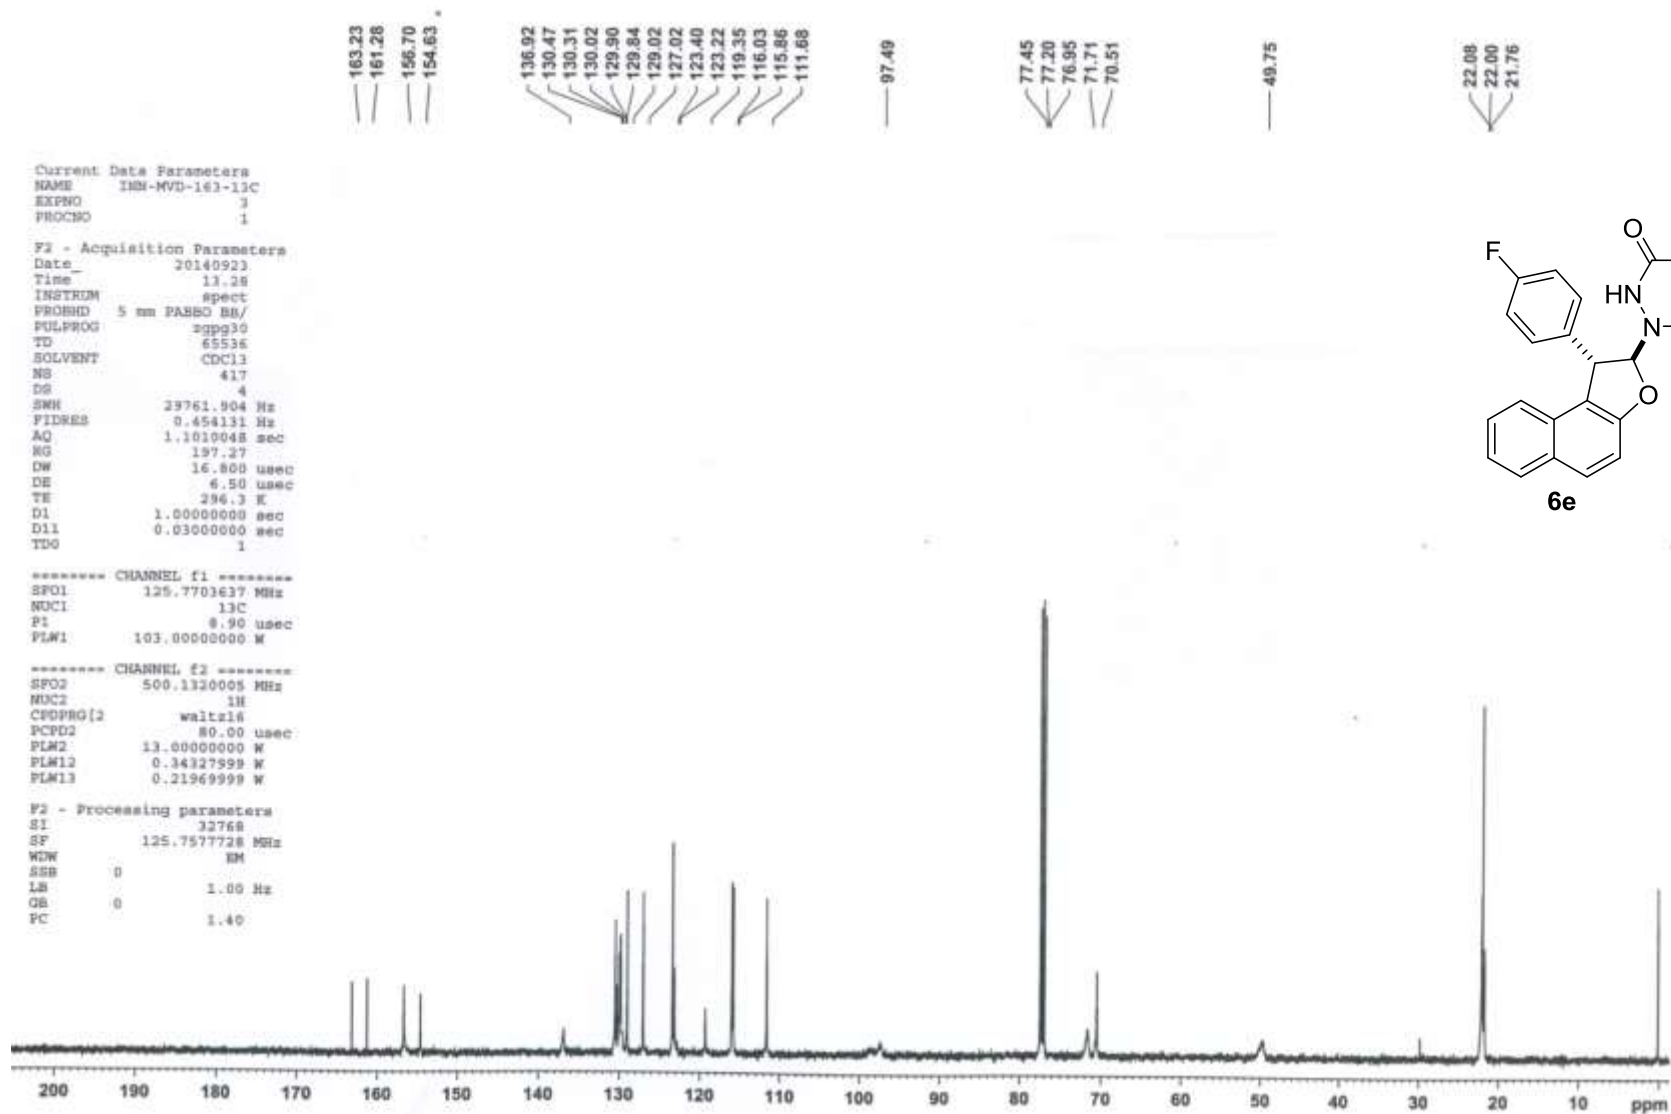

Figure S45.  $^{13}\text{C}$  NMR Spectrum of **6e**

```

Current Data Parameters
NAME      INN-MVD-163-19F
EXPNO     1
PROCNO    1

F2 - Acquisition Parameters
Date_     20140924
Time      19.12
INSTRUM   spect
PROBHD    5 mm PABBO BH/
PULPROG   zgpg30
TD         131072
SOLVENT   CDCl3
NS         50
DS         4
SWH        113636.367 Hz
FIDRES     0.866977 Hz
AQ         0.5767168 sec
RG         197.27
DW         4.400 usec
DE         6.50 usec
TE         297.8 K
D1         1.00000000 sec
TDS        1

----- CHANNEL f1 -----
SFO1      470.5453186 MHz
NUC1       19F
P1         13.50 usec
PLW1       40.00000000 W

F2 - Processing parameters
SI         65536
SF         470.5933770 MHz
WDW        EM
SSB        0
LB         0.30 Hz
GB         0
PC         1.00

```

-115.00  
 -115.44

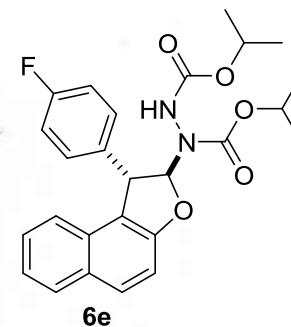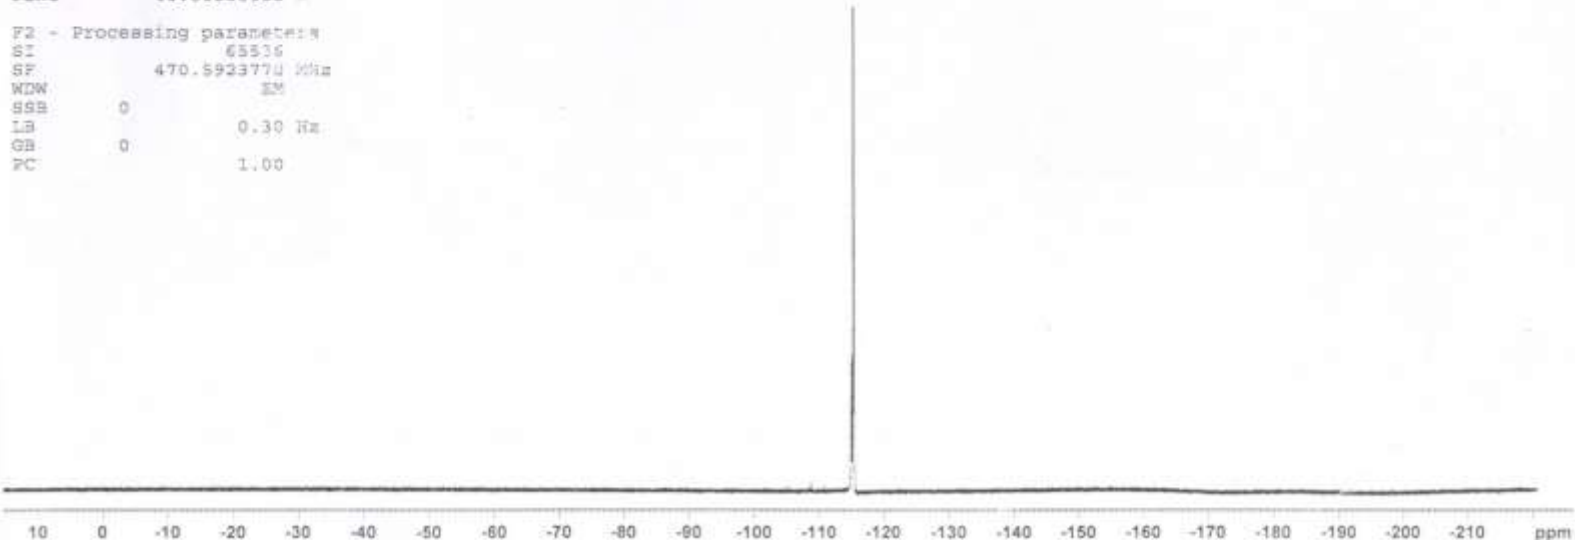

Figure S46. <sup>19</sup>F NMR Spectrum of **6e**



```

Current Data Parameters
NAME      INH-MVD-153-1H
EXPNO    1
PROCNO   1

F2 - Acquisition Parameters
Date_    20140406
Time     10.33
INSTRUM  spect
PROBHD   5 mm PABBO BB/
PULPROG  zg30
TD       65536
SOLVENT  CDCl3
NS       30
DS       2
SWH      10080.000 Hz
FIDRES   0.152588 Hz
AQ       3.2767899 sec
RG       30.72
DM       50.000 usec
DE       6.50 usec
TE       294.4 K
D1       1.00000000 sec
TD0      1

***** CHANNEL f1 *****
SFO1     500.1330885 MHz
NUC1      1H
P1       13.00 usec
PLM1     13.00000000 W

F2 - Processing parameters
SI       65536
SF       500.1330880 MHz
WDW      RM
SSB      0
LE       0.30 Hz
GB       0
PC       1.00

```

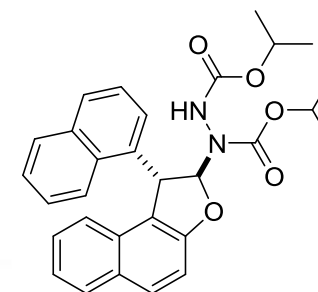

**6f**

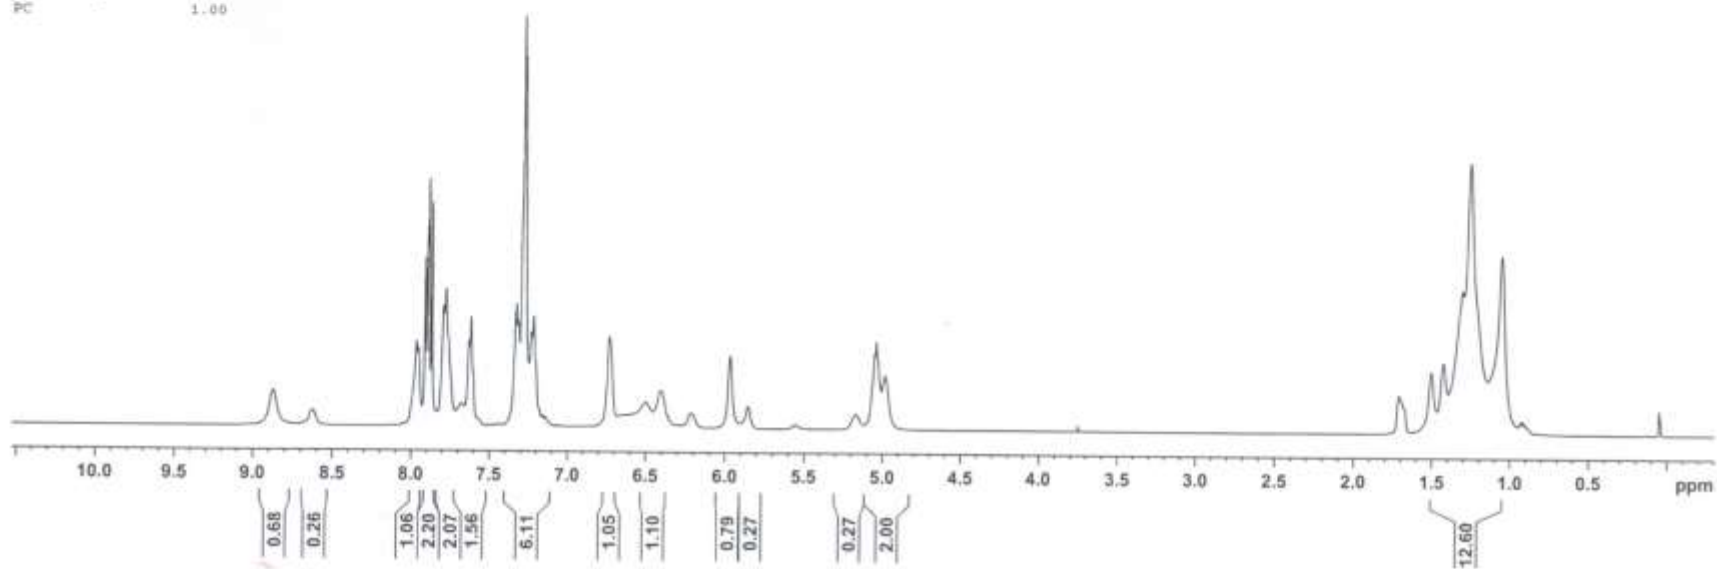

Figure S47.  $^1\text{H}$  NMR Spectrum of **6f**

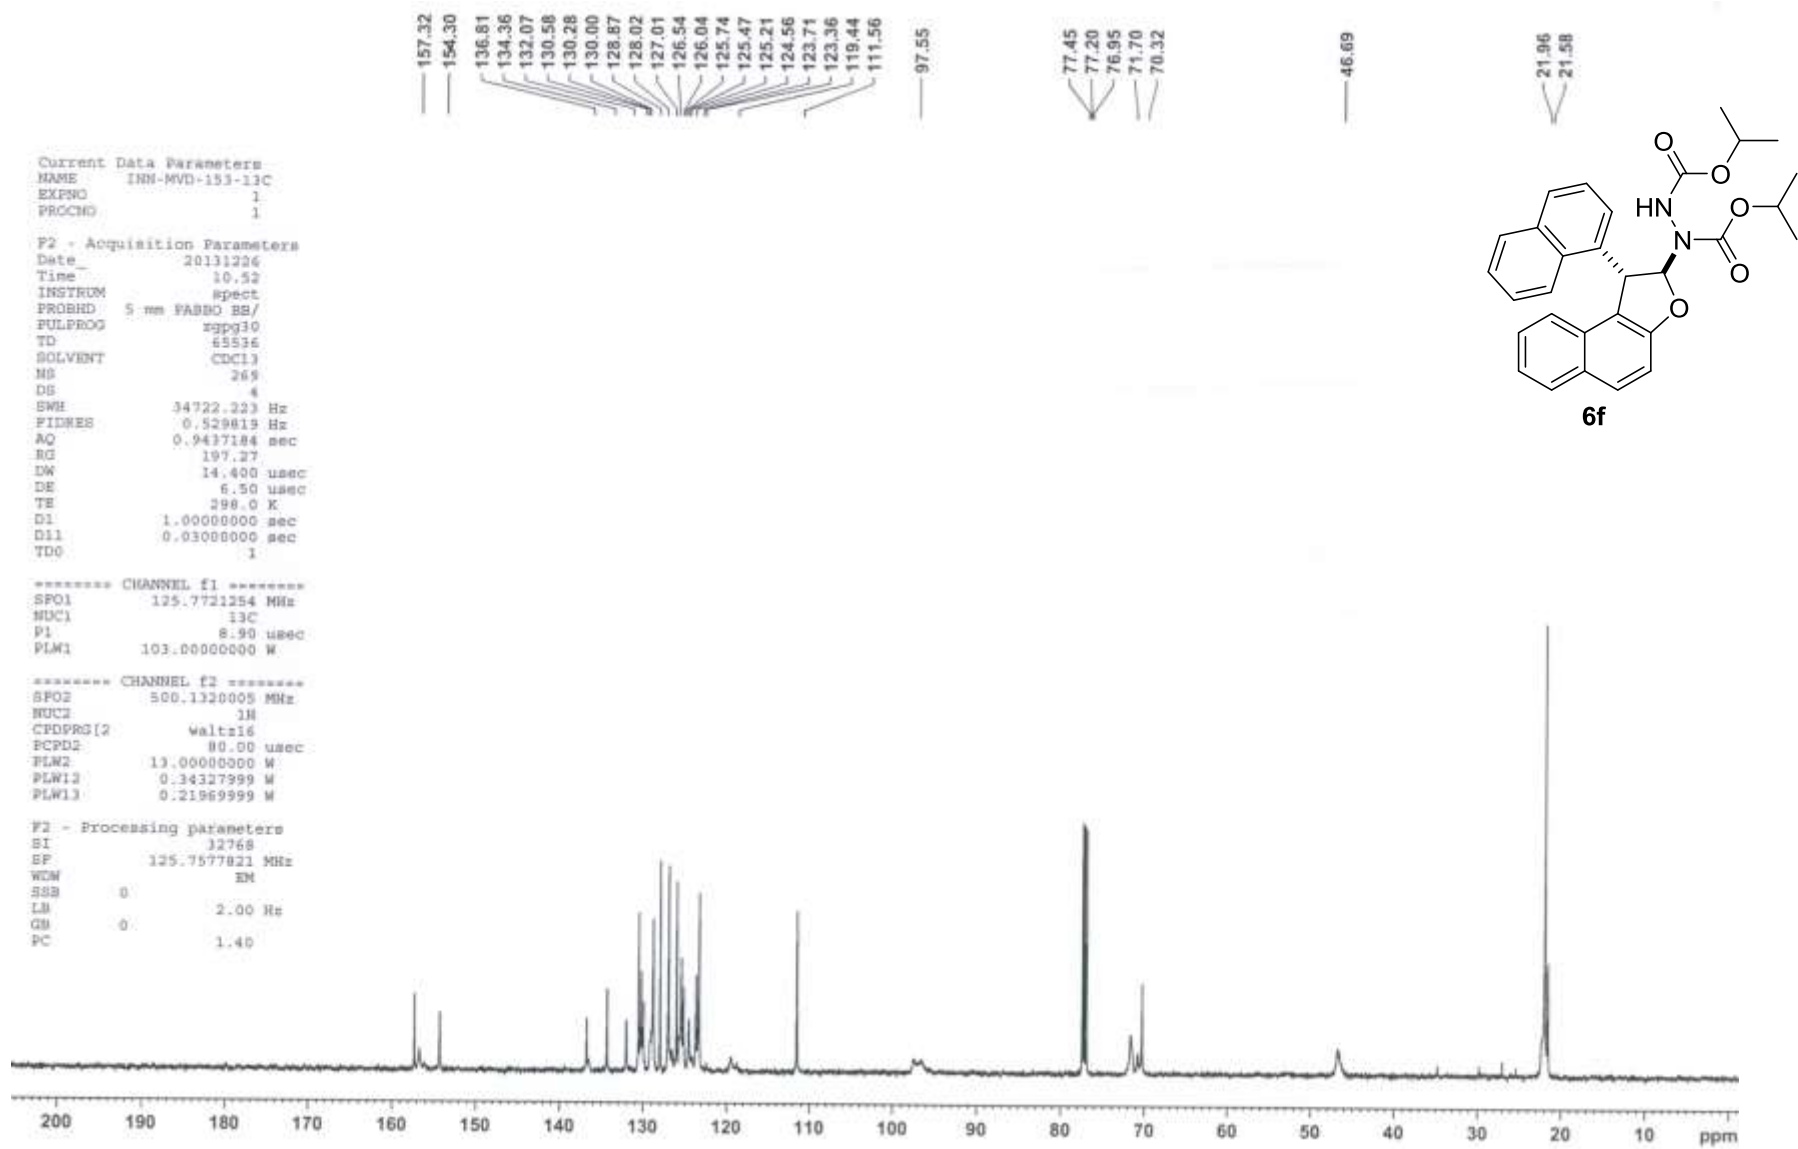

Figure S48.  $^{13}\text{C}$  NMR Spectrum of **6f**

```

Current Data Parameters
NAME      1MN-MVD-152-1H
EXPNO    1
PROCNO   1

F2 - Acquisition Parameters
Date_    20140921
Time     17.01
INSTRUM  spect
PROBHD   5 mm BABB0 BB/
PULPROG  zg30
TD       65536
SOLVENT  CDCl3
HS       20
DS       2
SWH      10000.000 Hz
FIDRES   0.152588 Hz
AQ       3.2767599 sec
RG       30.72
DW       50.000 usec
DE       6.50 usec
TE       298.4 K
D1       1.00000000 sec
TDO      1

```

```

***** CHANNEL f1 *****
SFO1    500.1330885 MHz
NUC1     1H
P1      13.00 usec
PLW1    13.00000000 W

```

```

F2 - Processing parameters
SI      65536
SF      500.1300215 MHz
WDW     RM
SSB     0
LB      0.30 Hz
GB      0
PC      1.00

```

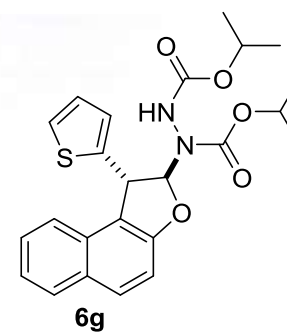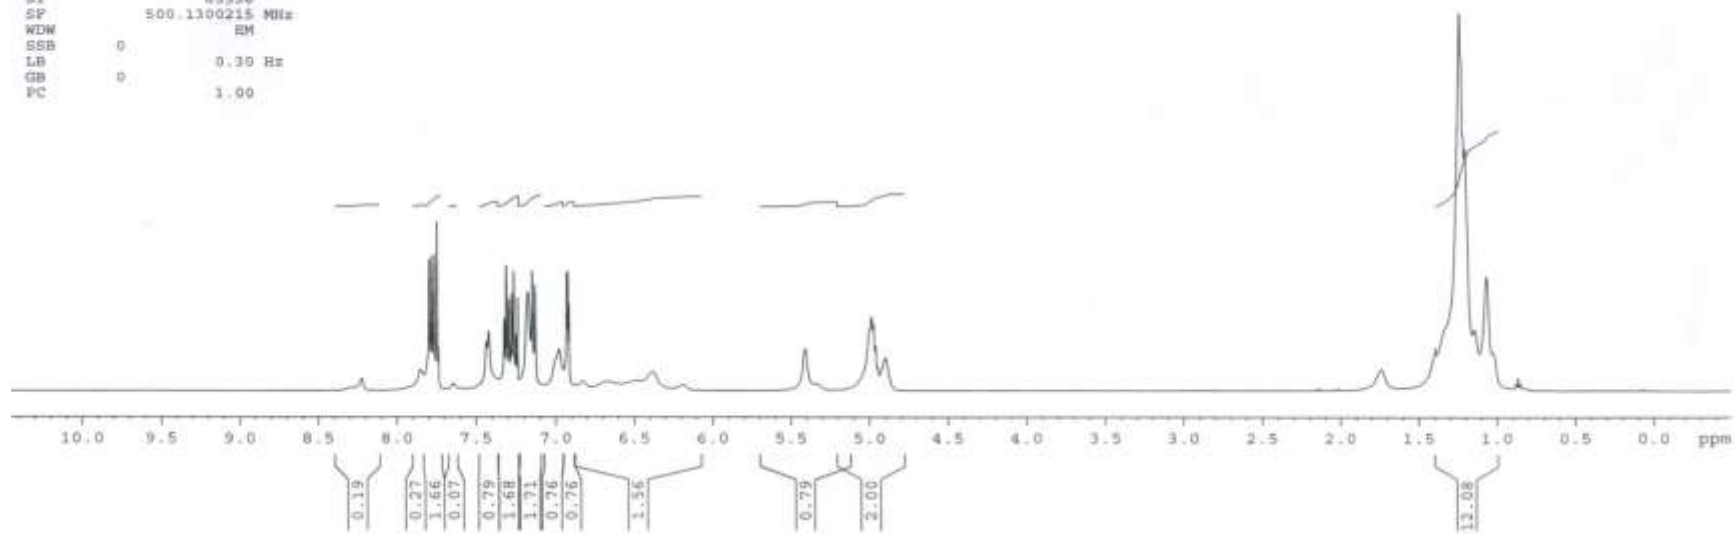

Figure S49. <sup>1</sup>H NMR Spectrum of **6g**

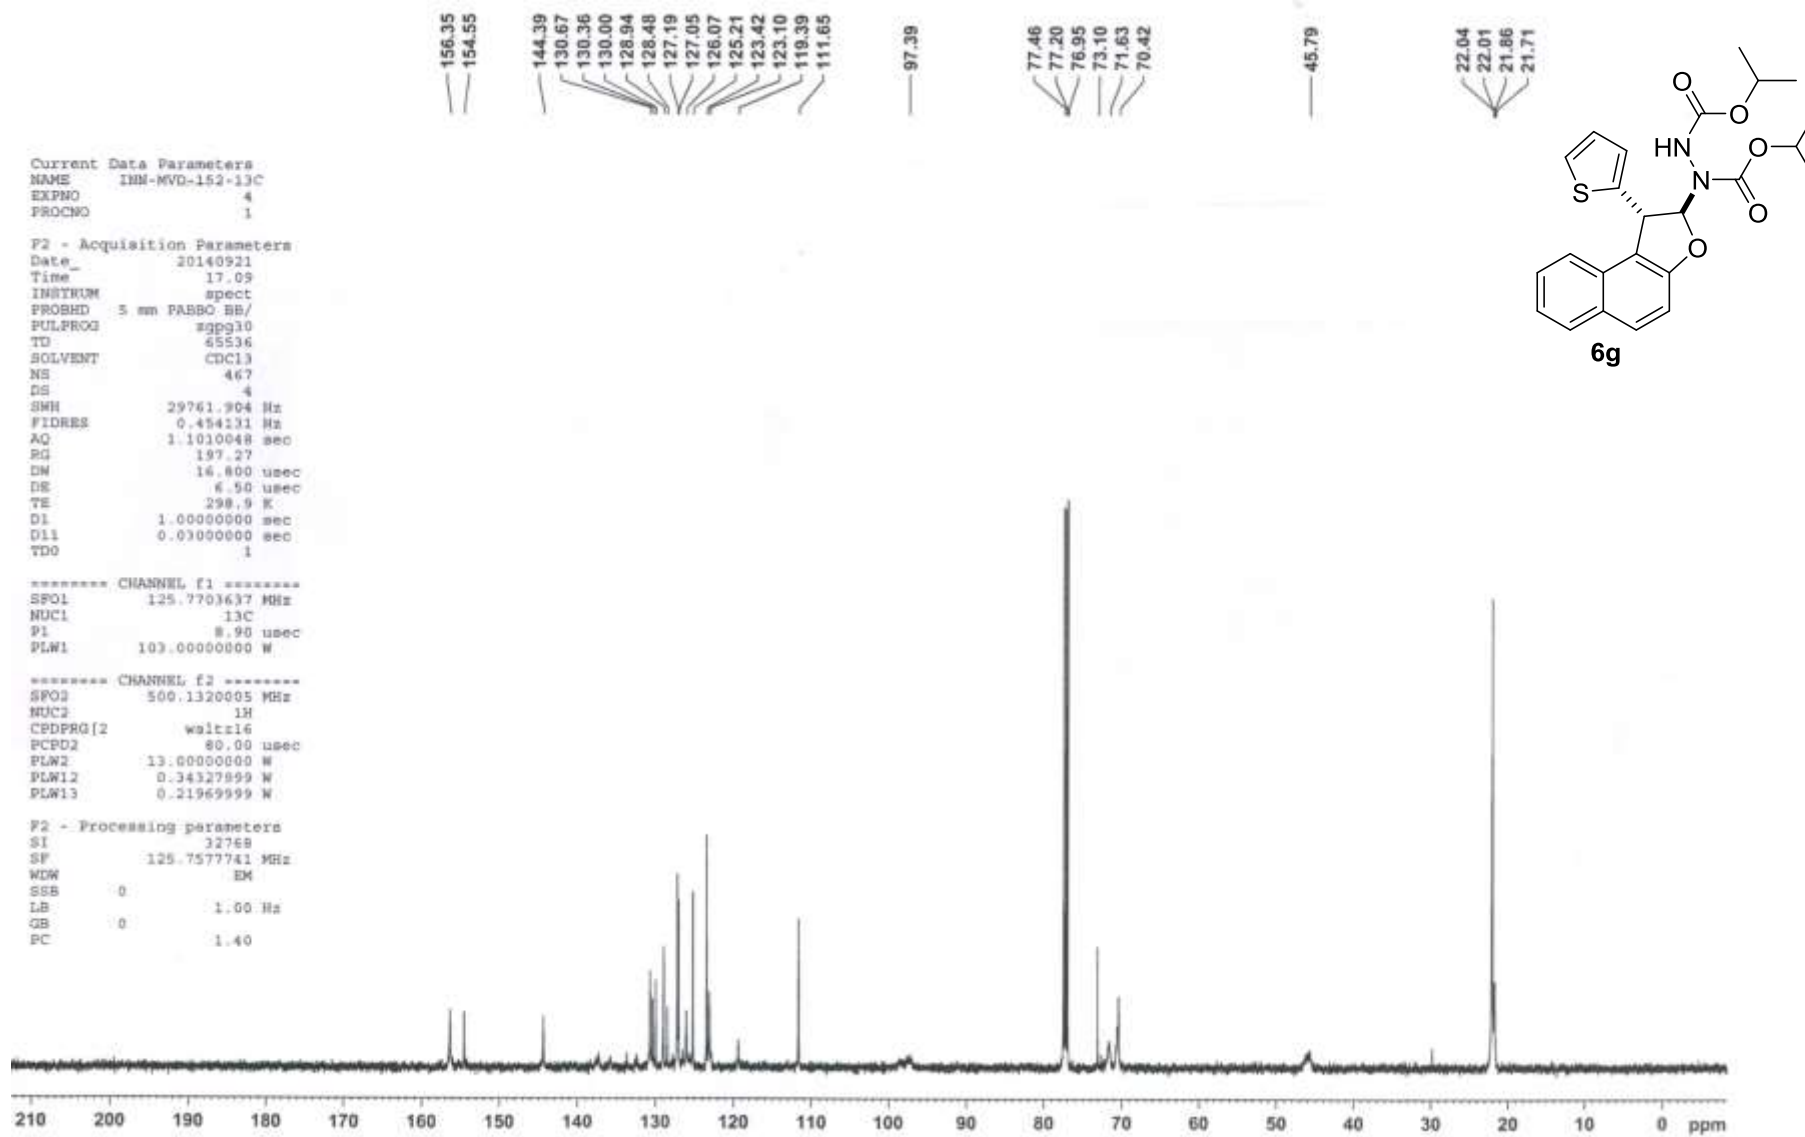

Figure S50.  $^{13}\text{C}$  NMR Spectrum of **6g**

```

NAME      INN-MVD-165-1H
EXPNO     7
PROCNO    1
Date_     20131219
Time      10.25
INSTRUM   spect
PROBHD    5 mm SEI 1H/0-
PULPROG   sg30
TD        65536
SOLVENT   CDCl3
NS        16
DS        0
SWH       8223.685 Hz
FIDRES    0.125483 Hz
AQ        3.9846387 sec
RG        90.5
DW        60.800 usec
DE        6.50 usec
TE        295.6 K
D1        1.00000000 sec
TD0       1

```

```

===== CHANNEL f1 =====
NUC1      1H
P1        6.75 usec
PL1       -3.00 dB
PL1W      16.73965454 W
SFO1      400.1324710 MHz
SI        32768
SF        400.1300106 MHz
WDW       EM
SSB       0
LB        0.30 Hz
GB        0
PC        1.00

```

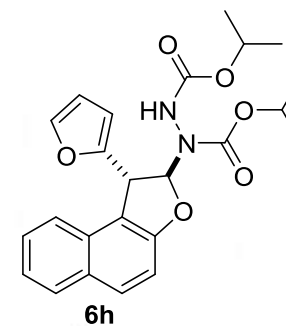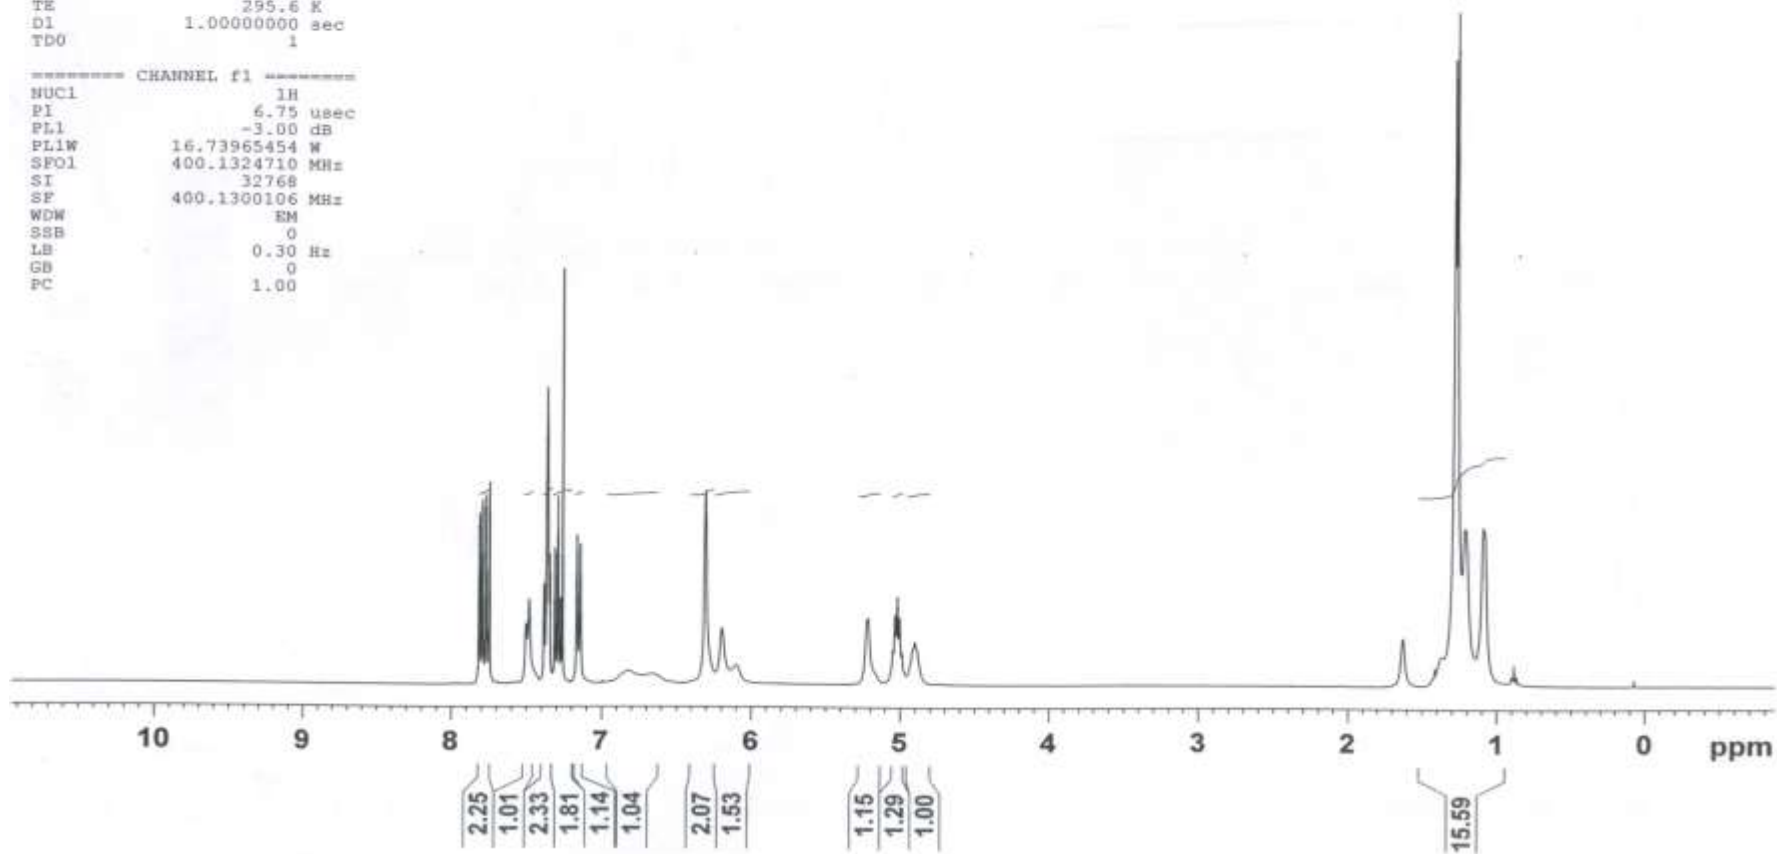

Figure S51. <sup>1</sup>H NMR Spectrum of **6h**

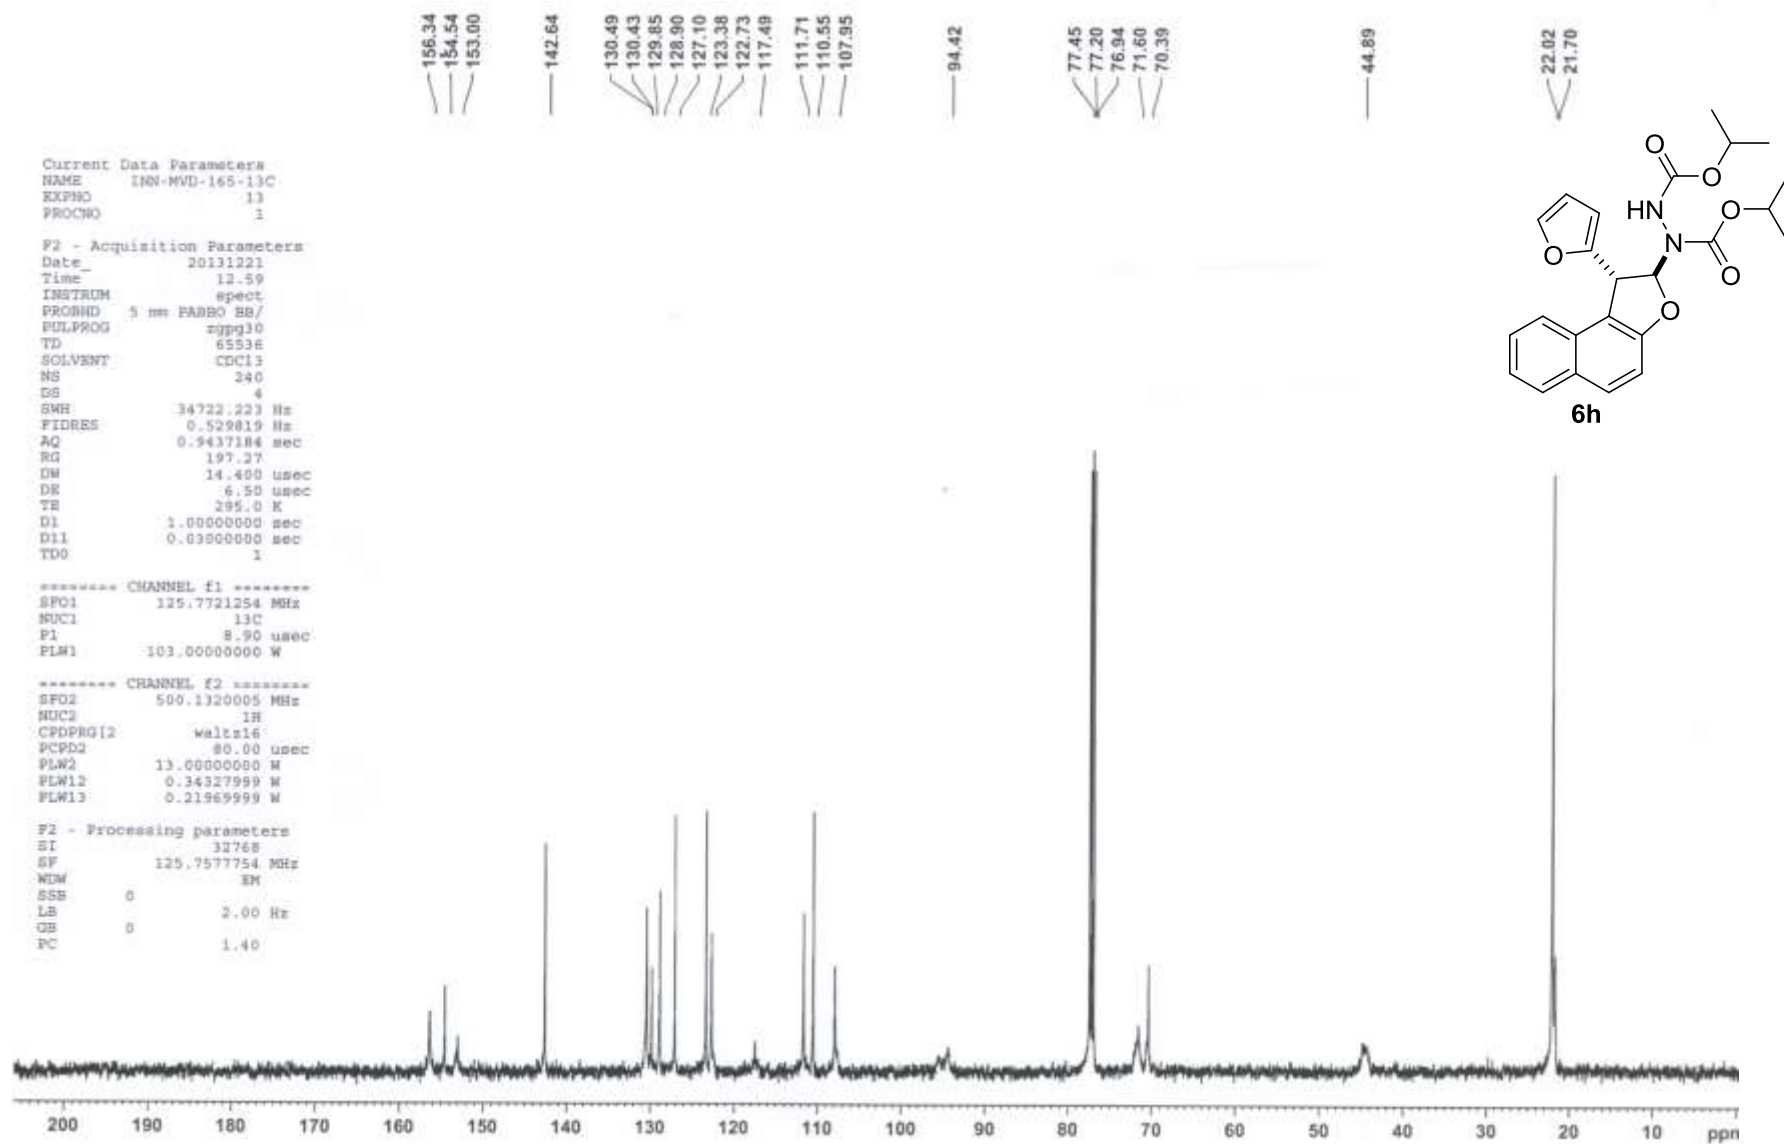

Figure S52.  $^{13}\text{C}$  NMR Spectrum of **6h**

```

NAME      INN-MVD-320-1R
EXPNO     1
PROCNO    1
Date_     20140930
Time      18.23
INSTRUM   spect
PROBHD    5 mm PABBO BB-
PULPROG   zg30
TD         54274
SOLVENT   CDCl3
NS         20
DS         0
SWH        8223.685 Hz
FIDRES     0.151522 Hz
AQ         3.2999091 sec
RG         32
DW         60.800 usec
DE         6.50 usec
TE         297.9 K
D1         1.00000000 sec
TDO        1

```

```

===== CHANNEL f1 =====
NOC1      1H
F1         14.75 usec
FL1        -1.00 dB
PL1W       18.56200695 W
SFO1       400.1324710 MHz
SI         32768
SF         400.1300268 MHz
WDW        EM
SSB         0
LB         0.30 Hz
GB         0
PC         1.00

```

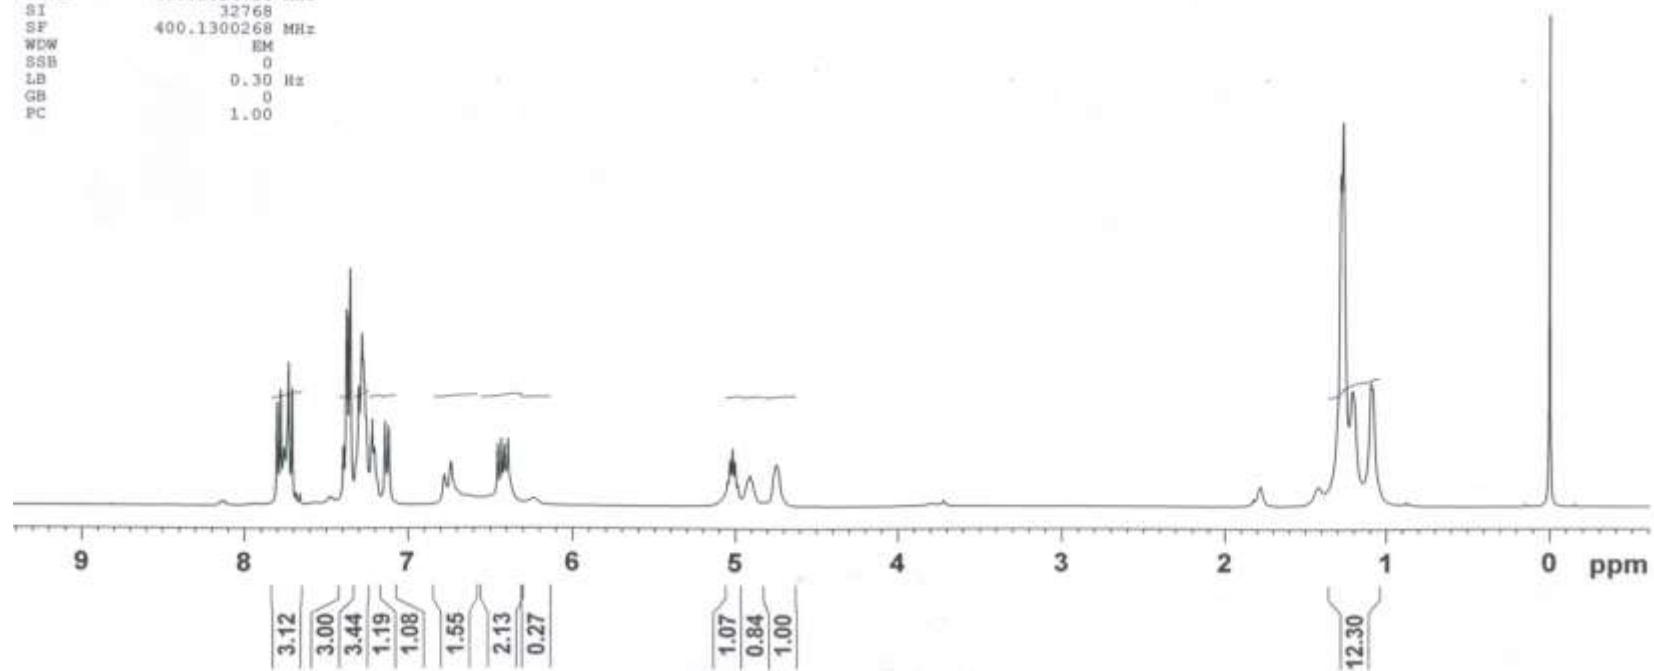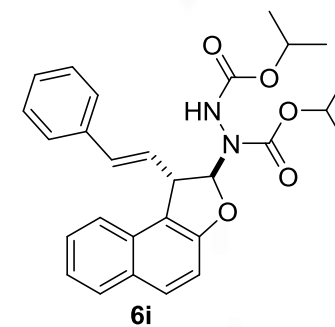

Figure S53. <sup>1</sup>H NMR Spectrum of **6i**

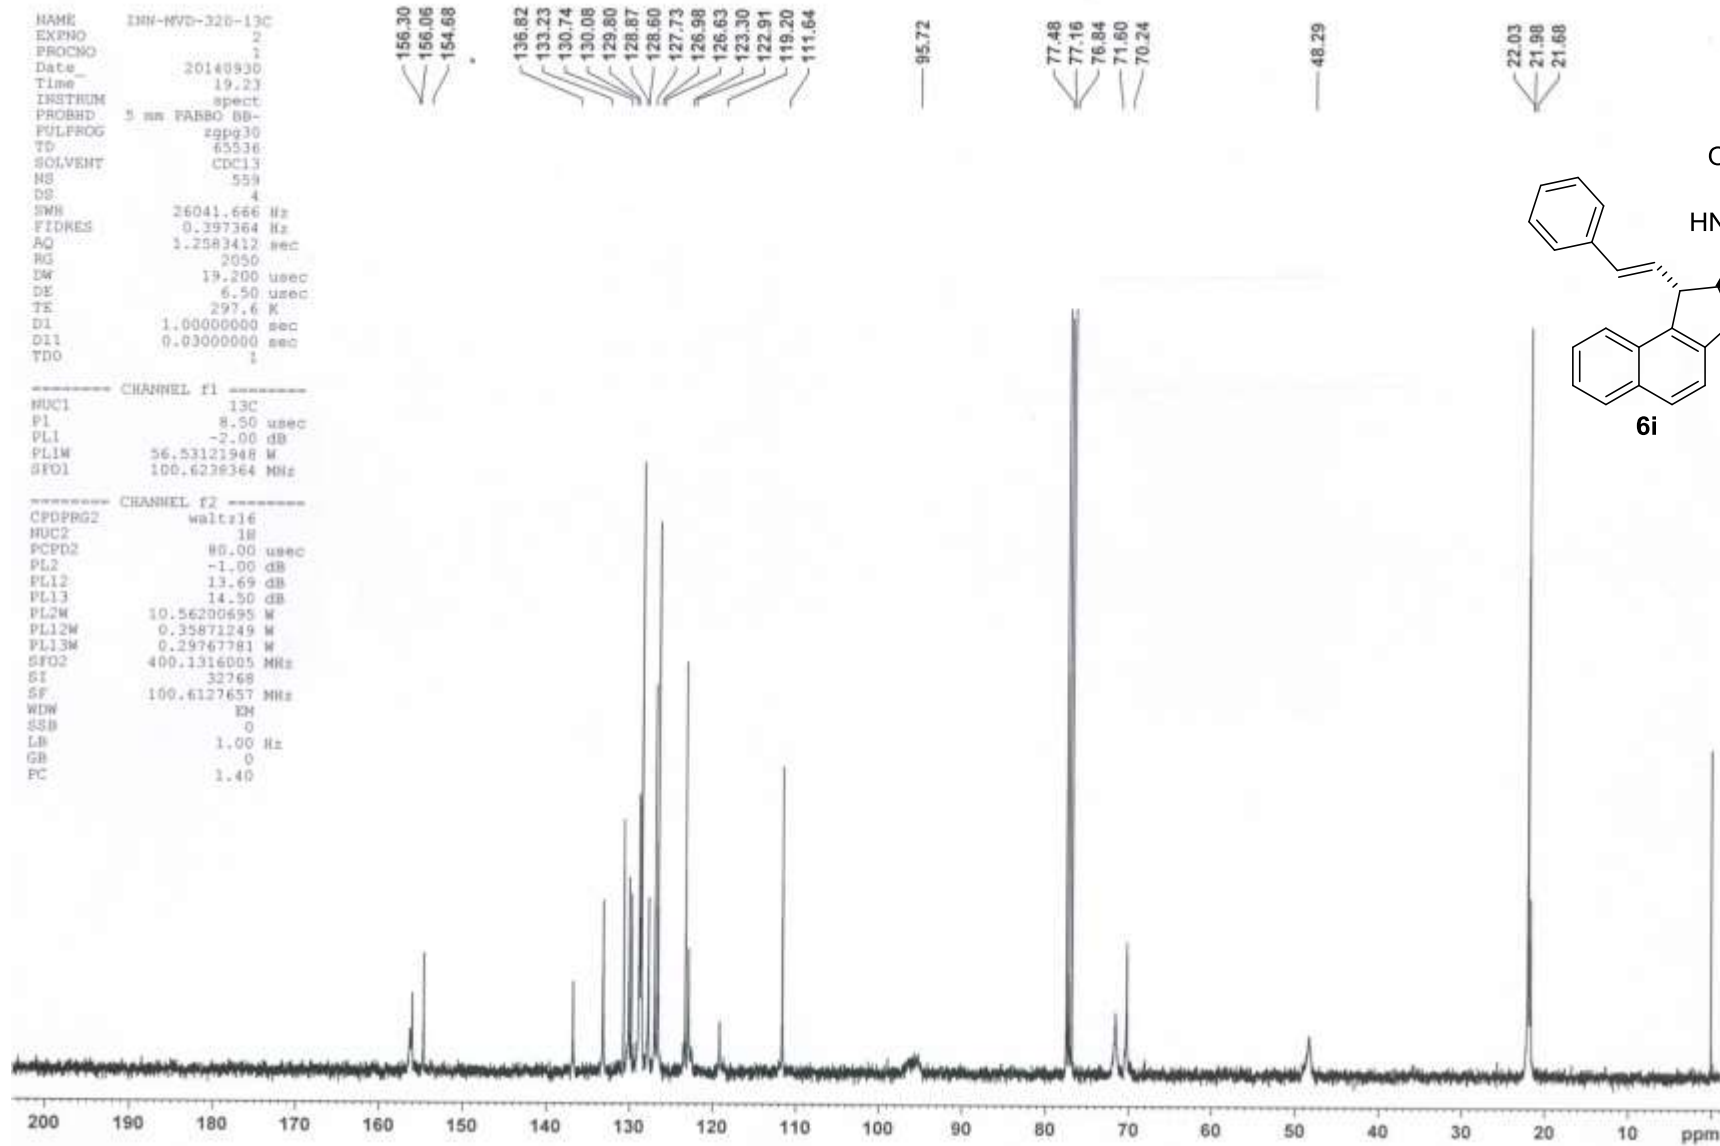

Figure S54.  $^{13}\text{C}$  NMR Spectrum of **6i**



Current Data Parameters  
NAME INH-MVD-155-1H  
EXPNO 9  
PROCNO 1

F2 - Acquisition Parameters  
Date\_ 20131225  
Time 21.53  
INSTRUM spect  
PROBHD 5 mm PABBO BB/  
PULPROG zg30  
TU 65536  
SOLVENT CDCl3  
NS 16  
DS 2  
SWH 10000.000 Hz  
FIDRES 0.152588 Hz  
AQ 3.2767999 sec  
RG 10.72  
DW 50.000 usec  
DE 6.50 usec  
TE 296.6 K  
D1 1.00000000 sec  
TDO 1

----- CHANNEL f1 -----  
SFO1 500.1330885 MHz  
NUC1 1H  
P1 13.00 usec  
PLW1 13.00000000 W

F2 - Processing parameters  
SI 65536  
SF 500.1330000 MHz  
WDW EM  
SSB 0  
LB 0.30 Hz  
GB 0  
PC 1.00

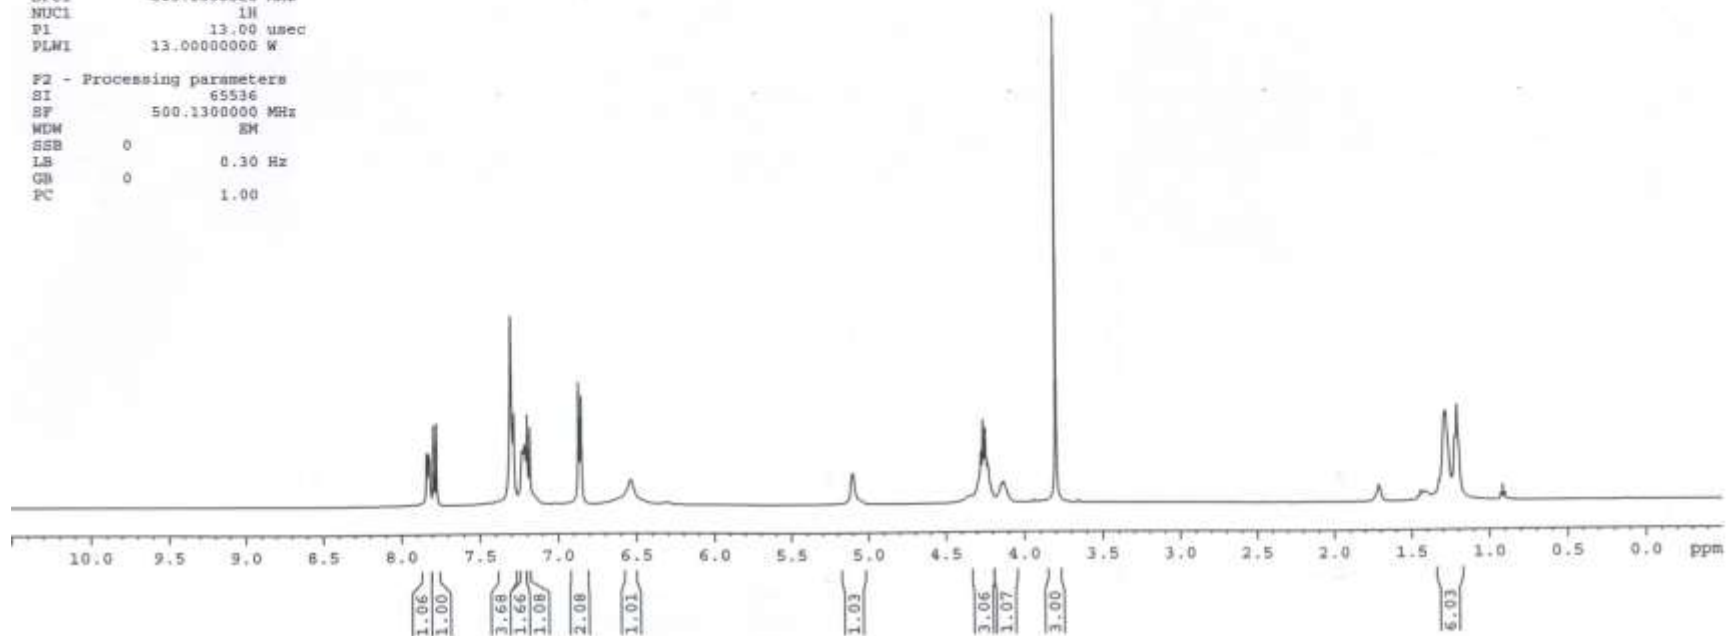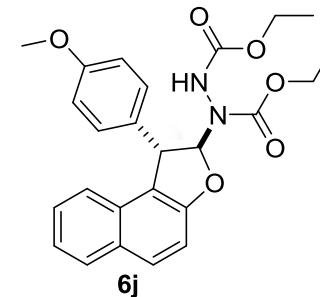

Figure S55. <sup>1</sup>H NMR Spectrum of **6j**

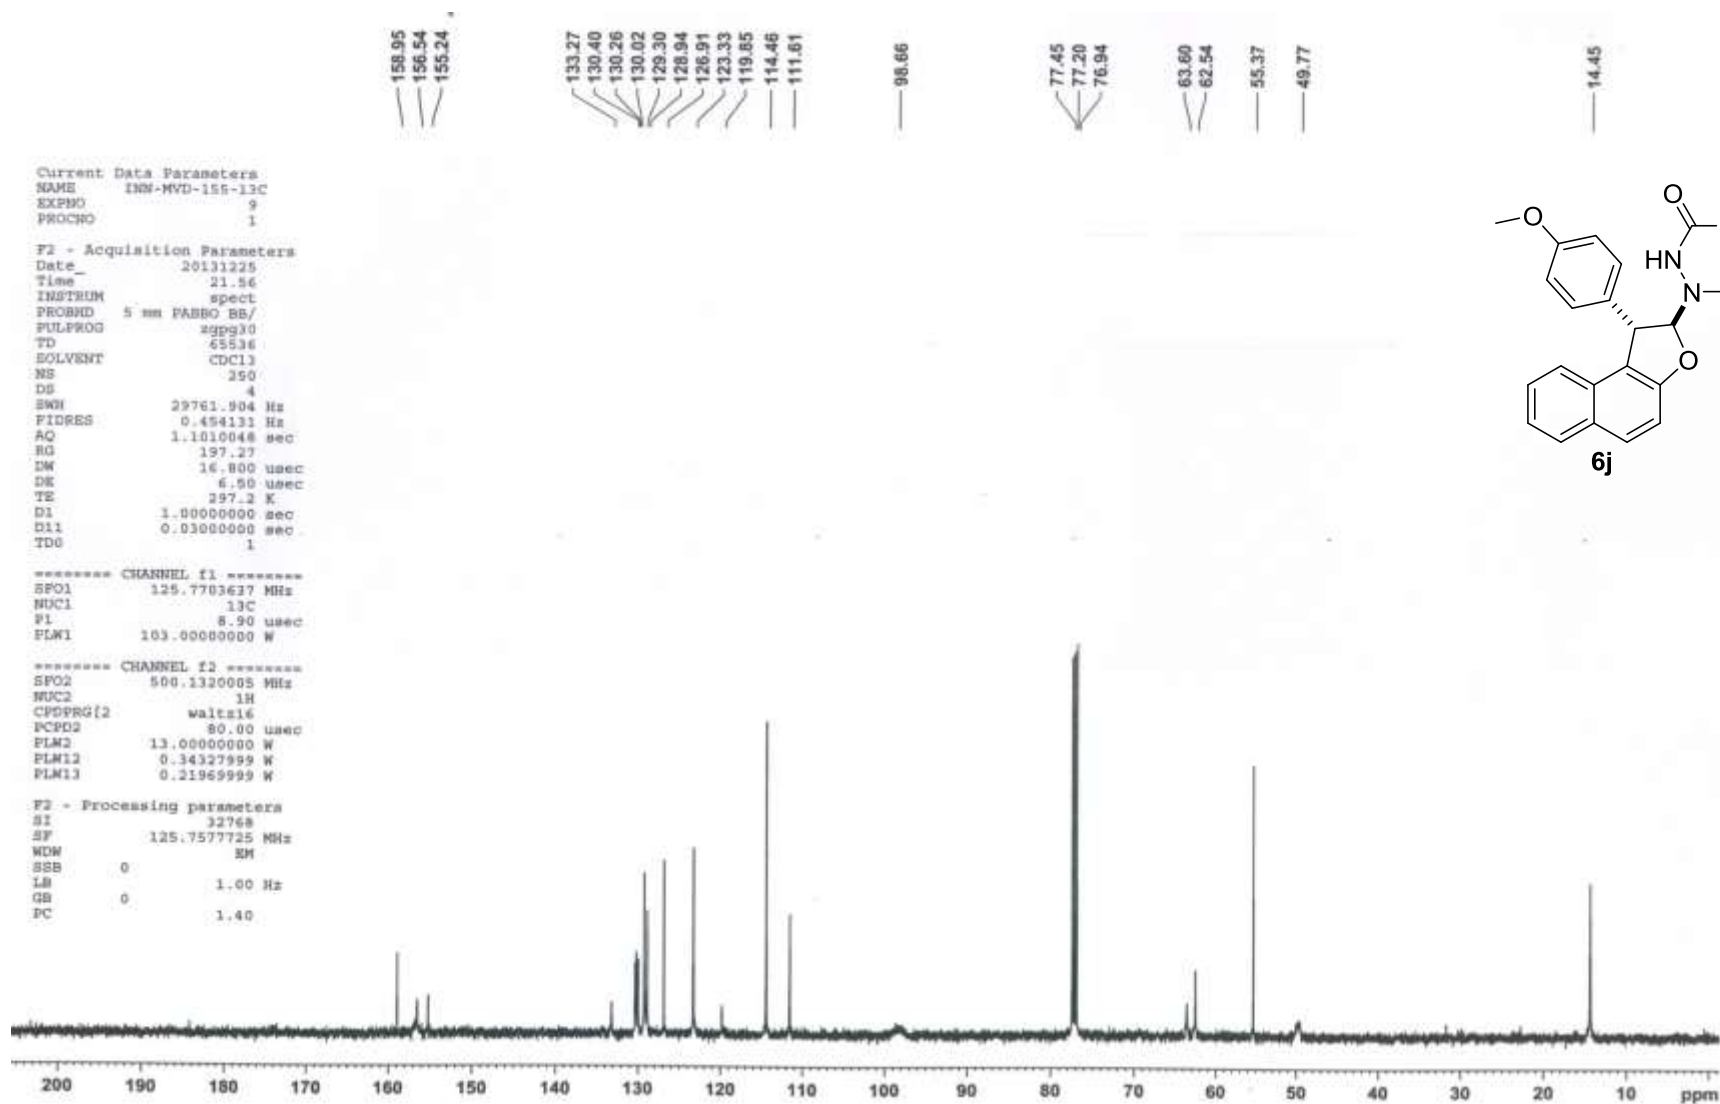

Figure S56.  $^{13}\text{C}$  NMR Spectrum of **6j**

```

NAME      INN-MVD-169-1H
EXPNO     4
PROCNO    1
Date_     20141014
Time      18.25
INSTRUM   spect
PROBHD    5 mm PABBO BB-
PULPROG   zgpg30
TD        54274
SOLVENT   CDCl3
NS        14
DS        0
SWH       12019.230 Hz
FIDRES    0.221455 Hz
AQ        2.2578483 sec
RG        32
DM        41.600 usec
DE        6.50 usec
TE        297.3 K
D1        1.00000000 sec
D12       0.00002000 sec
TDO       1

```

```

===== CHANNEL f1 =====
NUC1      1H
P1        14.75 usec
PL1       -1.00 dB
PL19      38.23 dB
PL1W      10.56200595 W
PL19W     0.00126109 W
SFO1      400.1300279 MHz
SI        32768
SF        400.1300167 MHz
WDW       EM
SSB       0
LB        0.30 Hz
GB        0
PC        1.00

```

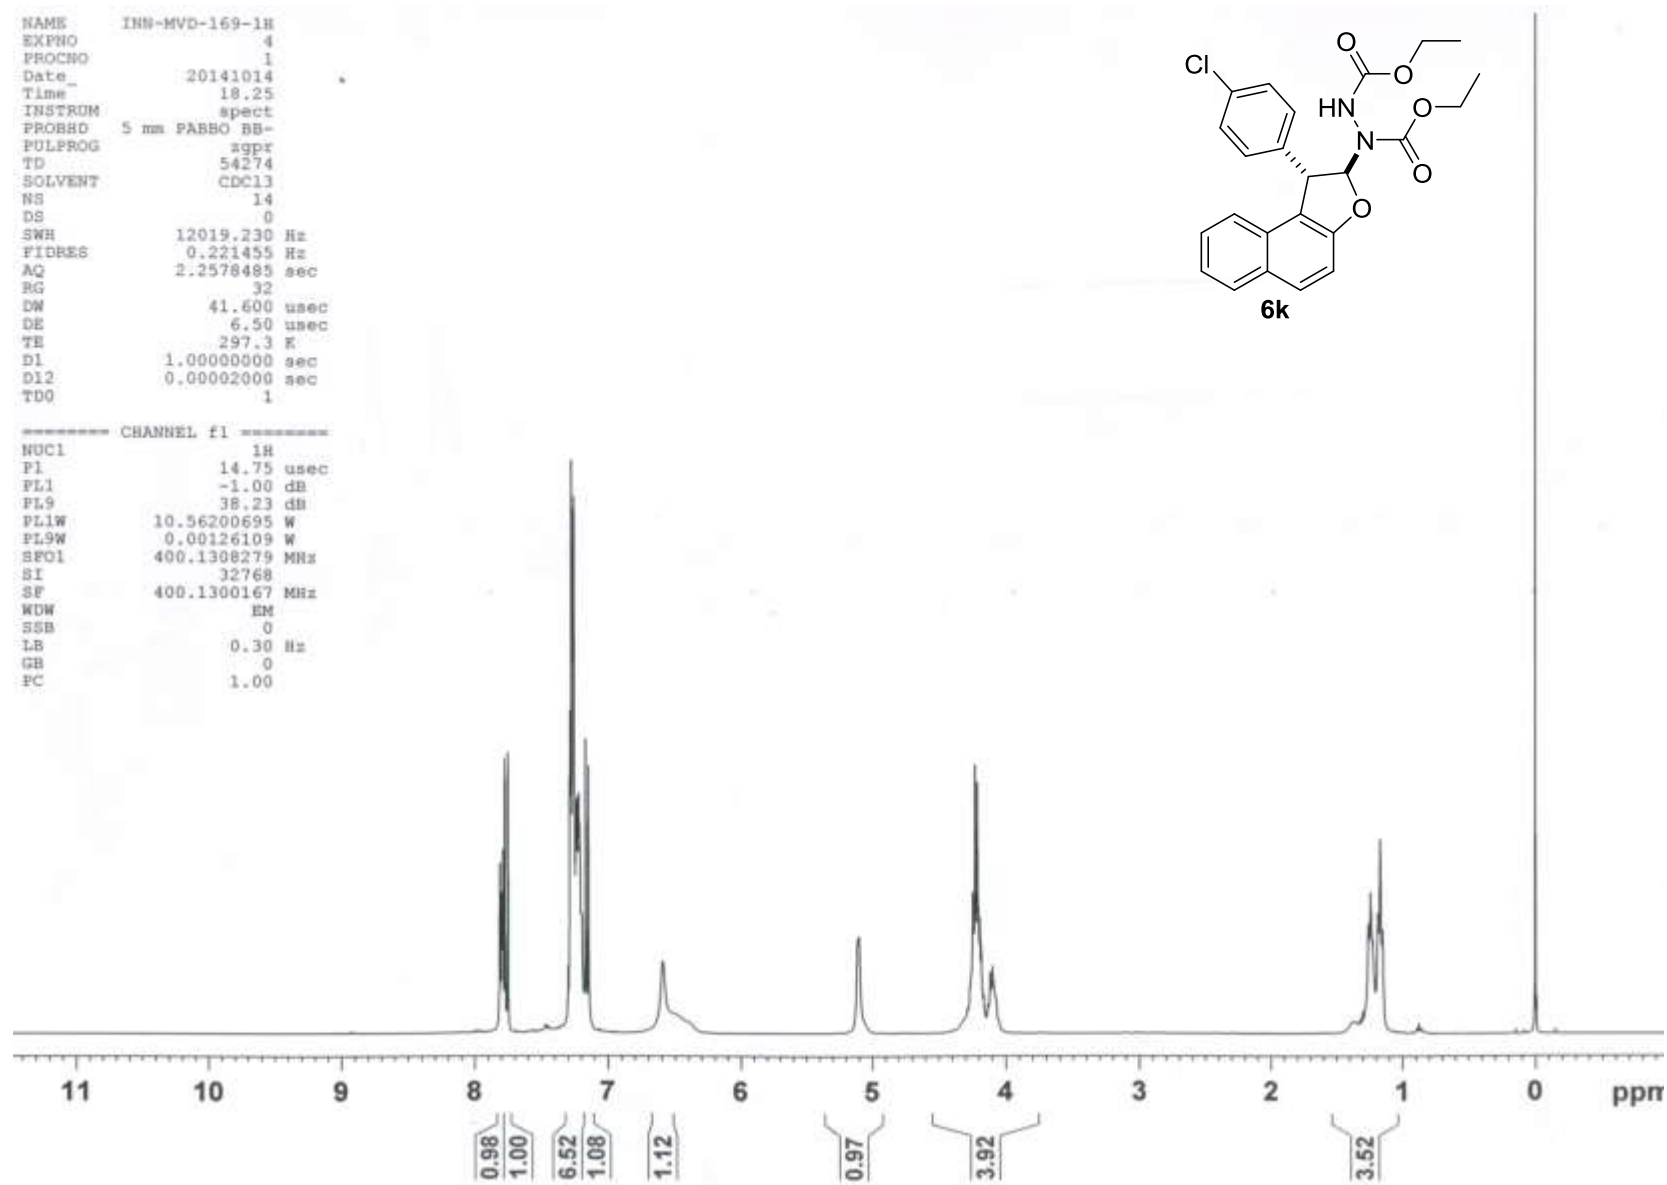

Figure S57. <sup>1</sup>H NMR Spectrum of **6k**

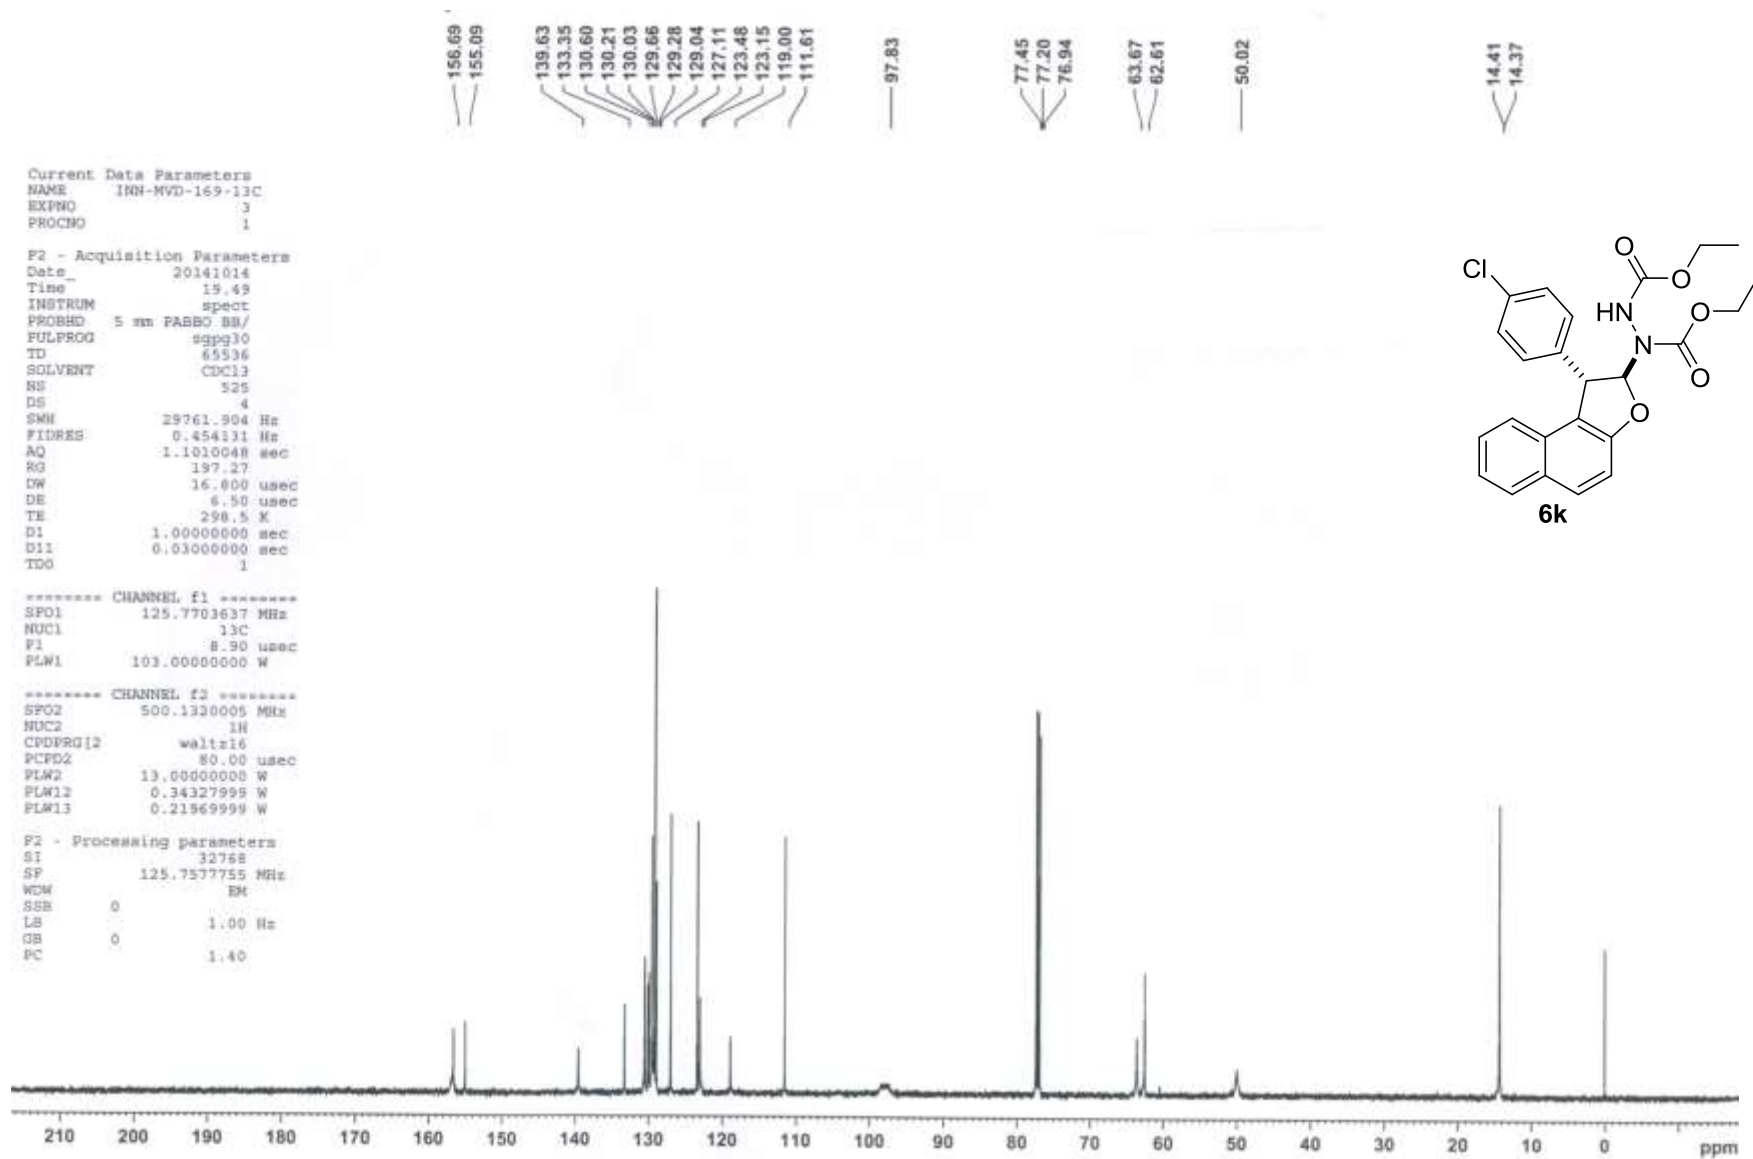

Figure S58. <sup>13</sup>C NMR Spectrum of **6k**

Current Data Parameters  
NAME INN-MVD-162-1H  
EXPSO 6  
PROCNO 1

F2 - Acquisition Parameters:  
Date\_ 20131210  
Time 19.33  
INSTRUM spect  
PROBHD 5 mm PABBO BB/  
PULPROG zg30  
TD 65536  
SOLVENT CDCl3  
NS 10  
DS 2  
SWH 10000.000 Hz  
FIDRES 0.152588 Hz  
AQ 3.2767999 sec  
RG 30.72  
RW 50.000 usec  
DE 6.50 usec  
TE 297.6 K  
D1 1.00000000 sec  
TD0 1

\*\*\*\*\* CHANNEL f1 \*\*\*\*\*  
SFO1 500.1330885 MHz  
NUC1 1H  
P1 13.00 usec  
PLW1 13.00000000 W

F2 - Processing parameters  
SI 65536  
SF 500.1300000 MHz  
WDW EM  
SSB 0  
LB 0.30 Hz  
GB 0  
PC 1.00

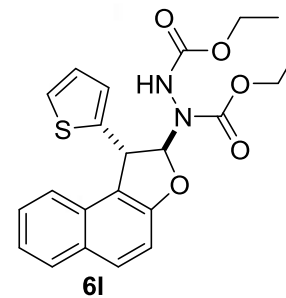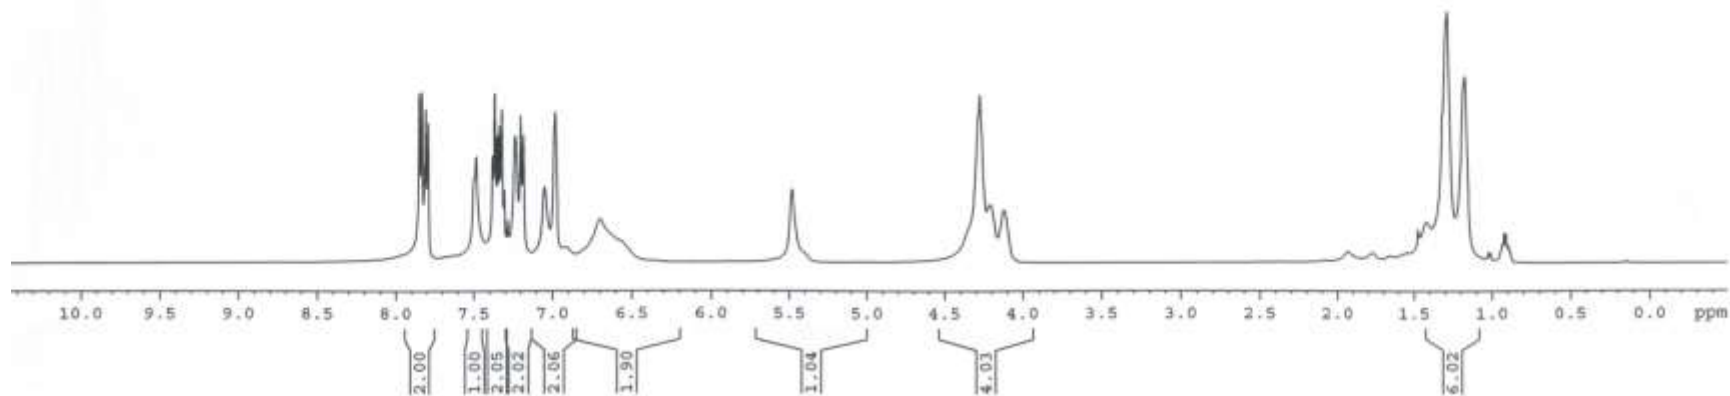

Figure S59. <sup>1</sup>H NMR Spectrum of **61**

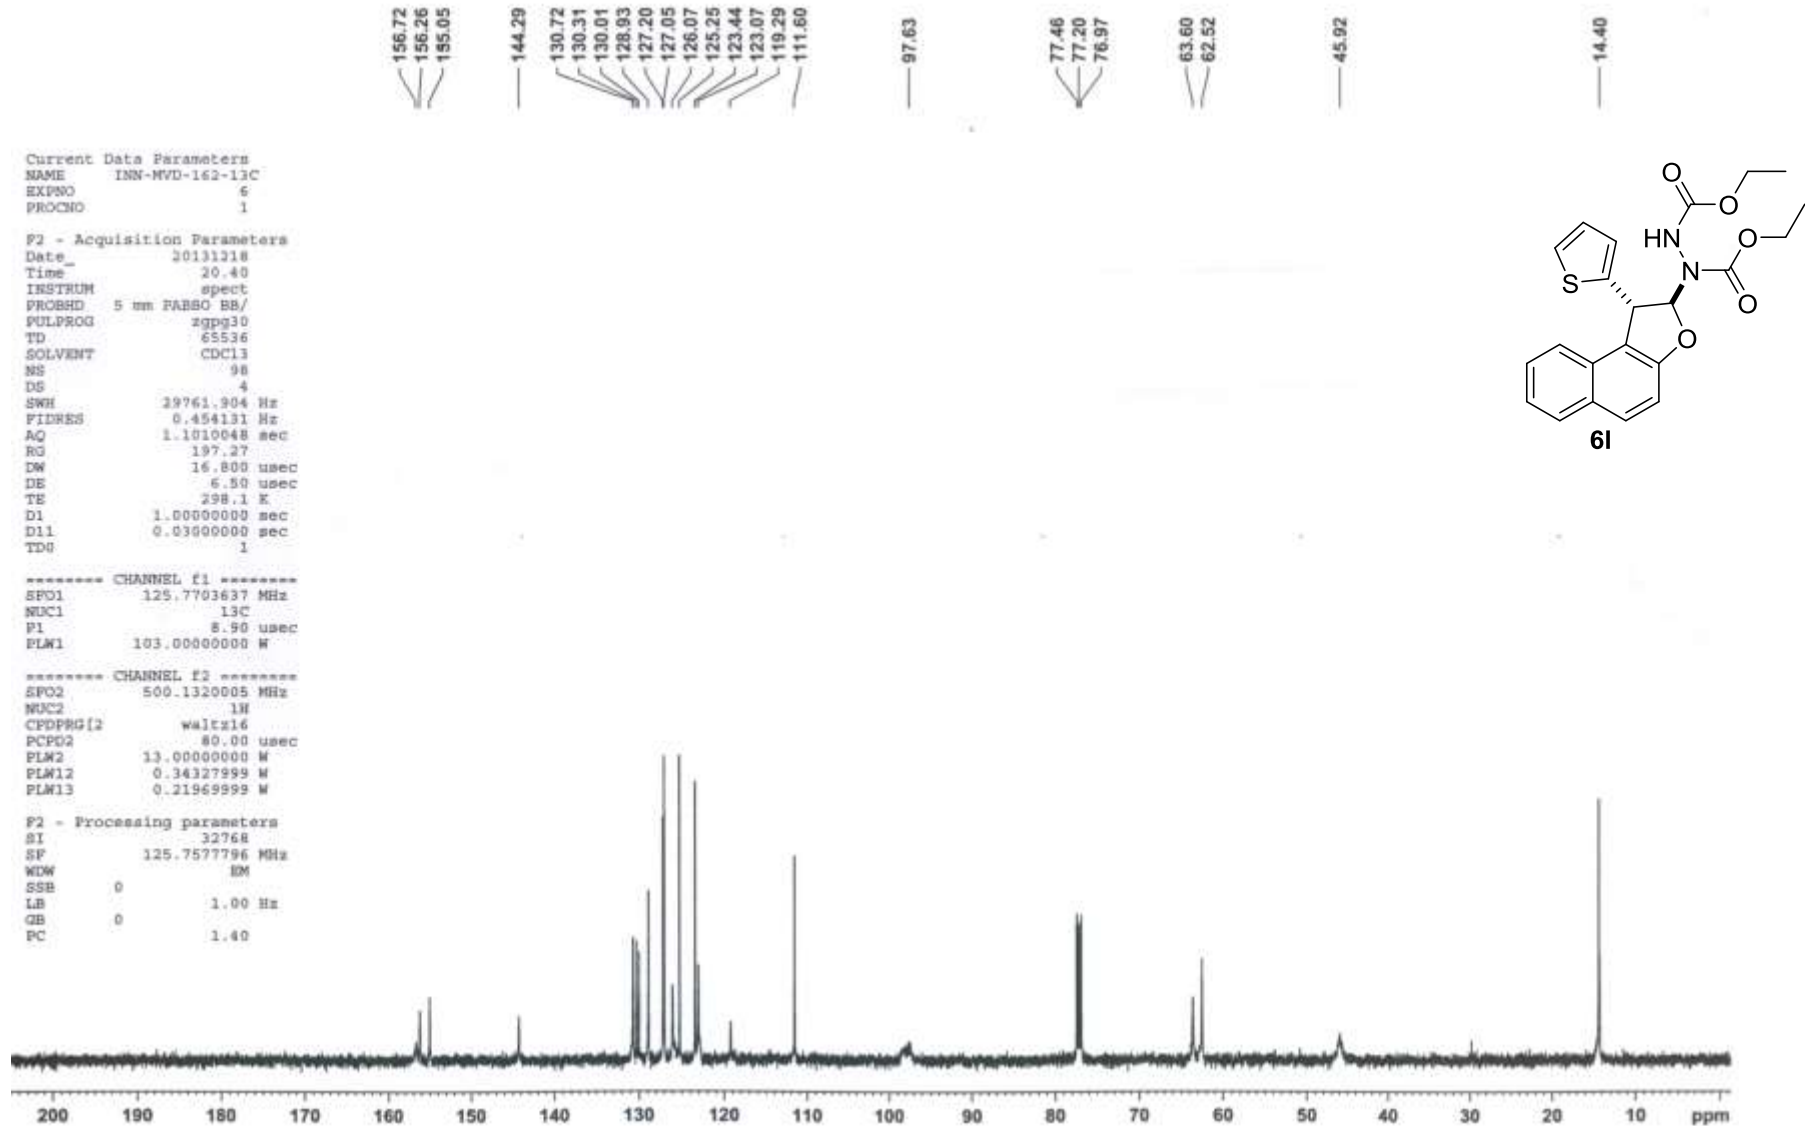

Figure S60. <sup>13</sup>C NMR Spectrum of **6l**

```

NAME      INN-MVD-444-1H
EXPNO     8
PROCNO    1
Date_     20150210
Time      21.25
INSTRUM   spect
PROBHD    5 mm PABBO BB-
PULPROG   zg30
TD        54274
SOLVENT   CDCl3
NS        16
DS        0
SWH       8223.665 Hz
FIDRES    0.151522 Hz
AQ        3.2999091 sec
RG        32
CW        60.800 usec
DE        6.50 usec
TE        295.9 K
D1        1.0000000 sec
TDO       1

```

```

----- CHANNEL f1 -----
NUC1      1H
P1        14.75 usec
PL1       -1.00 dB
PL1W      10.56200695 W
SFO1      400.1324710 MHz
SI        32768
SF        400.1300095 MHz
WDW       EM
SSB       0
LB        0.30 Hz
GB        0
PC        1.00

```

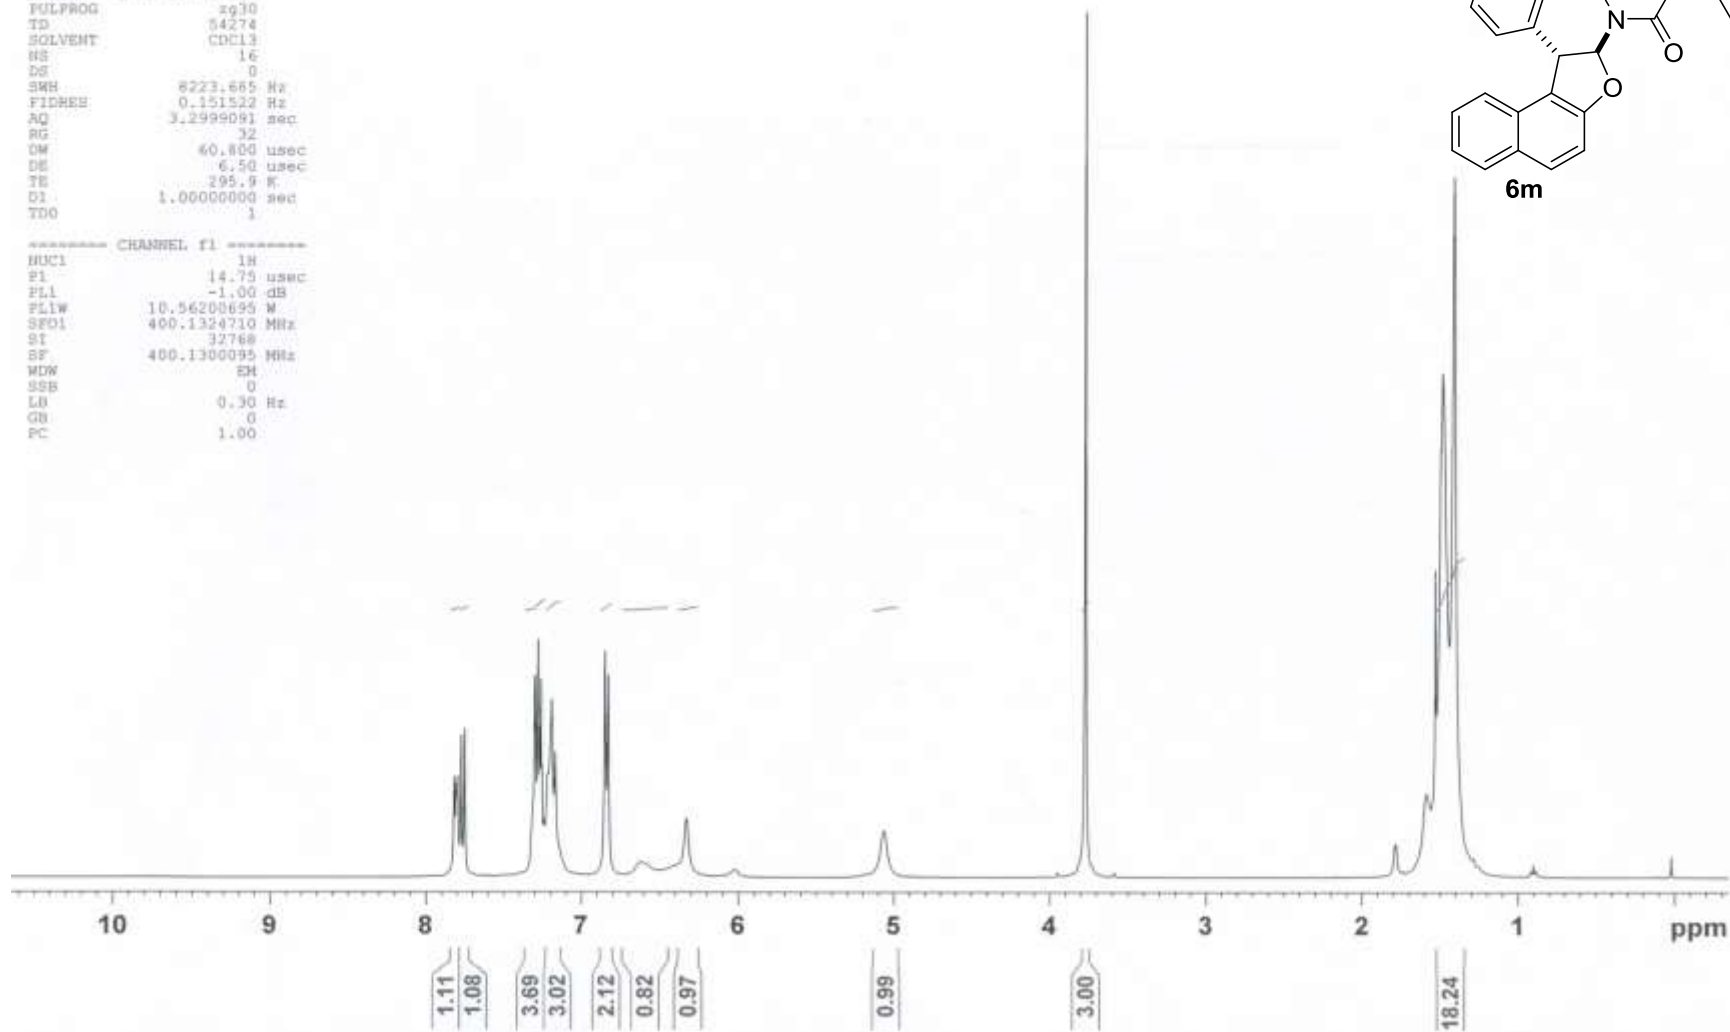

Figure S61. <sup>1</sup>H NMR Spectrum of **6m**

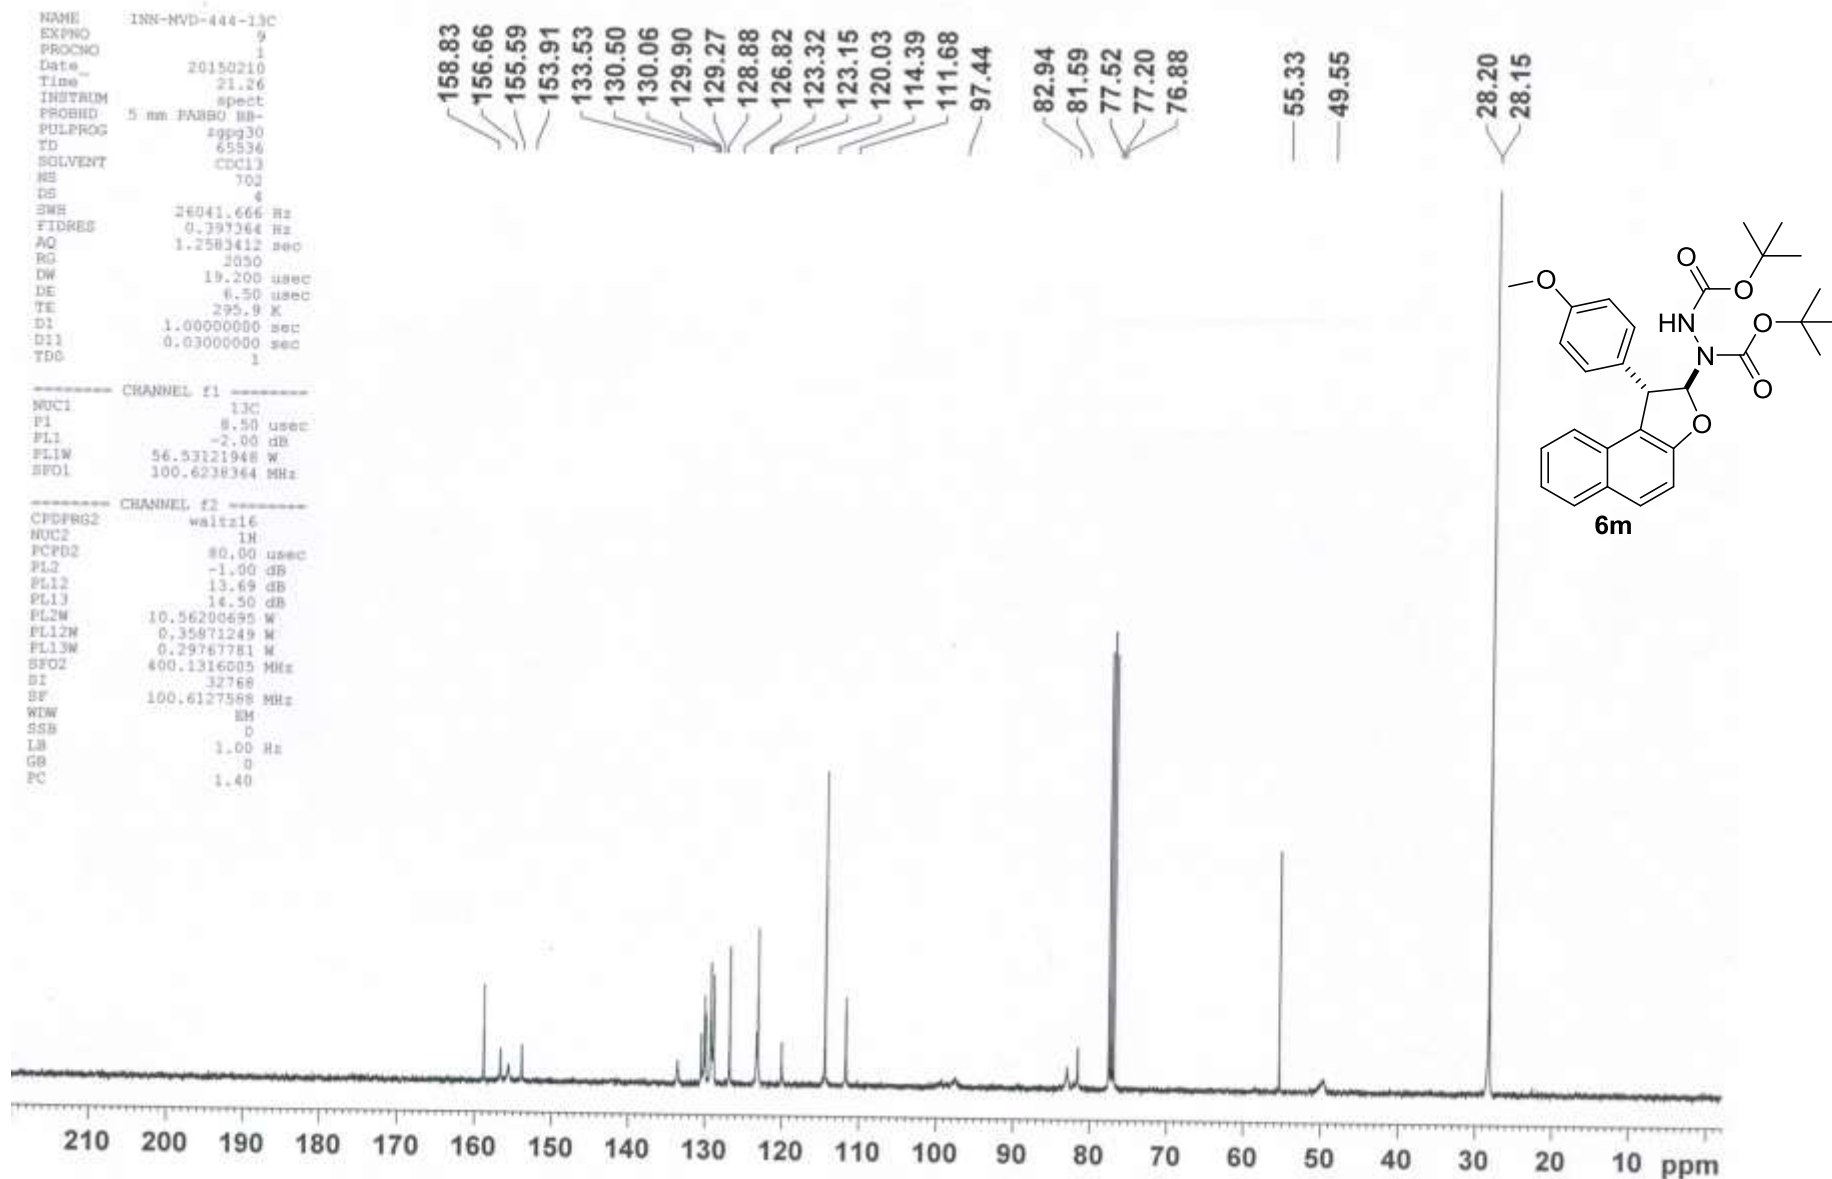

Figure S62.  $^{13}\text{C}$  NMR Spectrum of **6m**



```

NAME      INN-MVD-179-1H
EXPNO     1
PROCNO    1
Date_     20140111
Time      11.38
INSTRUM   spect
PROBHD    5 mm SEI 1H/D-
PULPROG   zg30
TD        65536
SOLVENT   CDCl3
NS        11
DS        0
SWH       8223.685 Hz
FIDRES    0.125483 Hz
AQ        3.9846387 sec
RG        32
DW        60.800 usec
DE        6.50 usec
TE        295.1 K
D1        1.00000000 sec
TD0       1

```

```

----- CHANNEL f1 -----
NUC1      1H
P1        6.75 usec
PL1       -3.00 dB
PL1W      16.73969454 W
SF01      400.1324710 MHz
SI        32768
SF        400.1300103 MHz
WDW       EM
SSB       0
LB        0.30 Hz
GB        0
PC        1.00

```

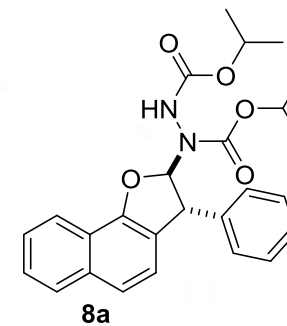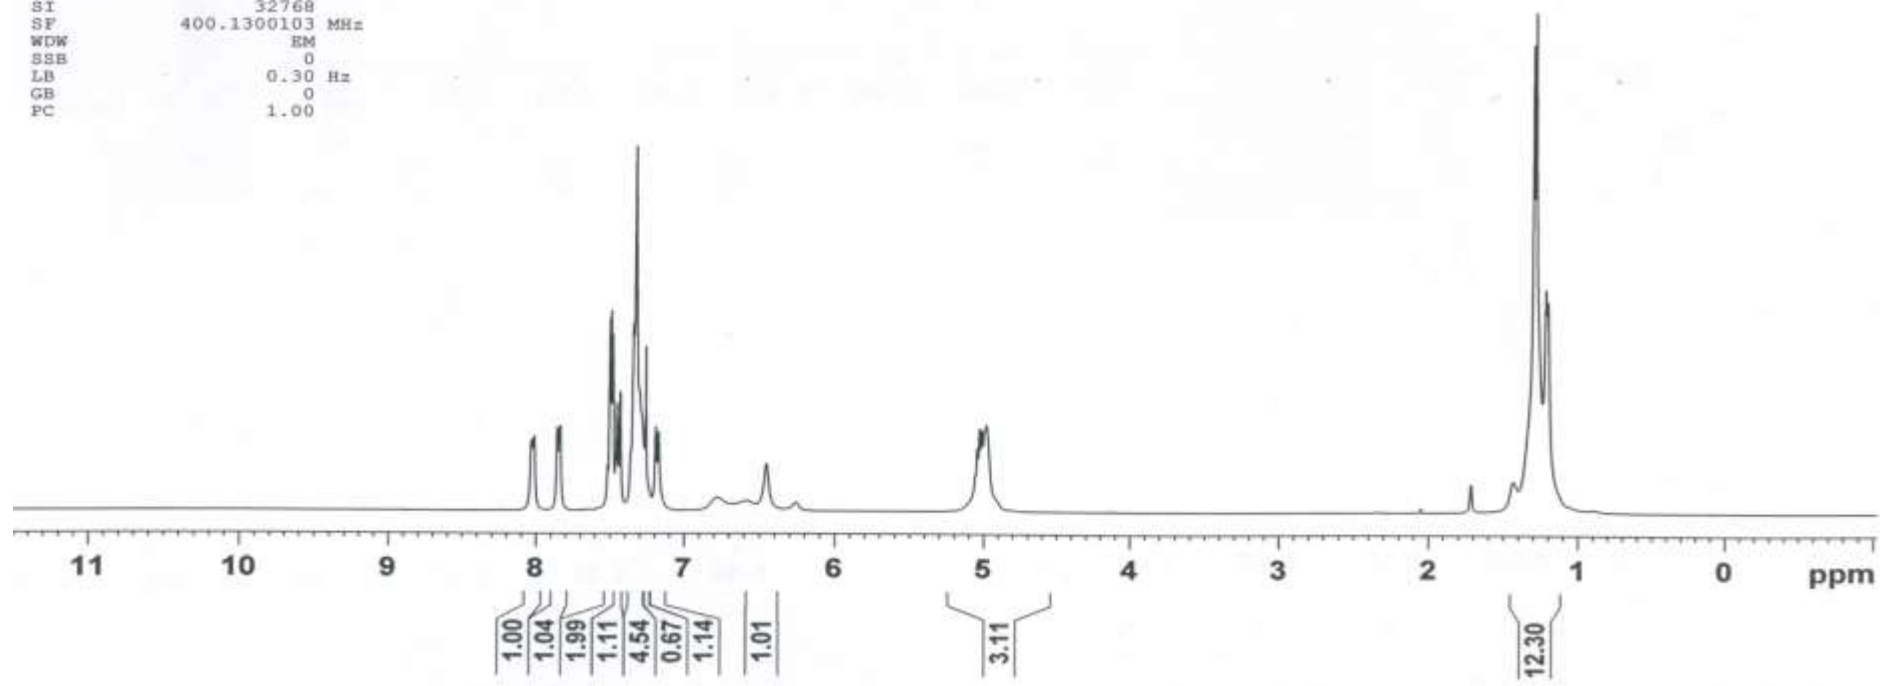

Figure S63. <sup>1</sup>H NMR Spectrum of **8a**

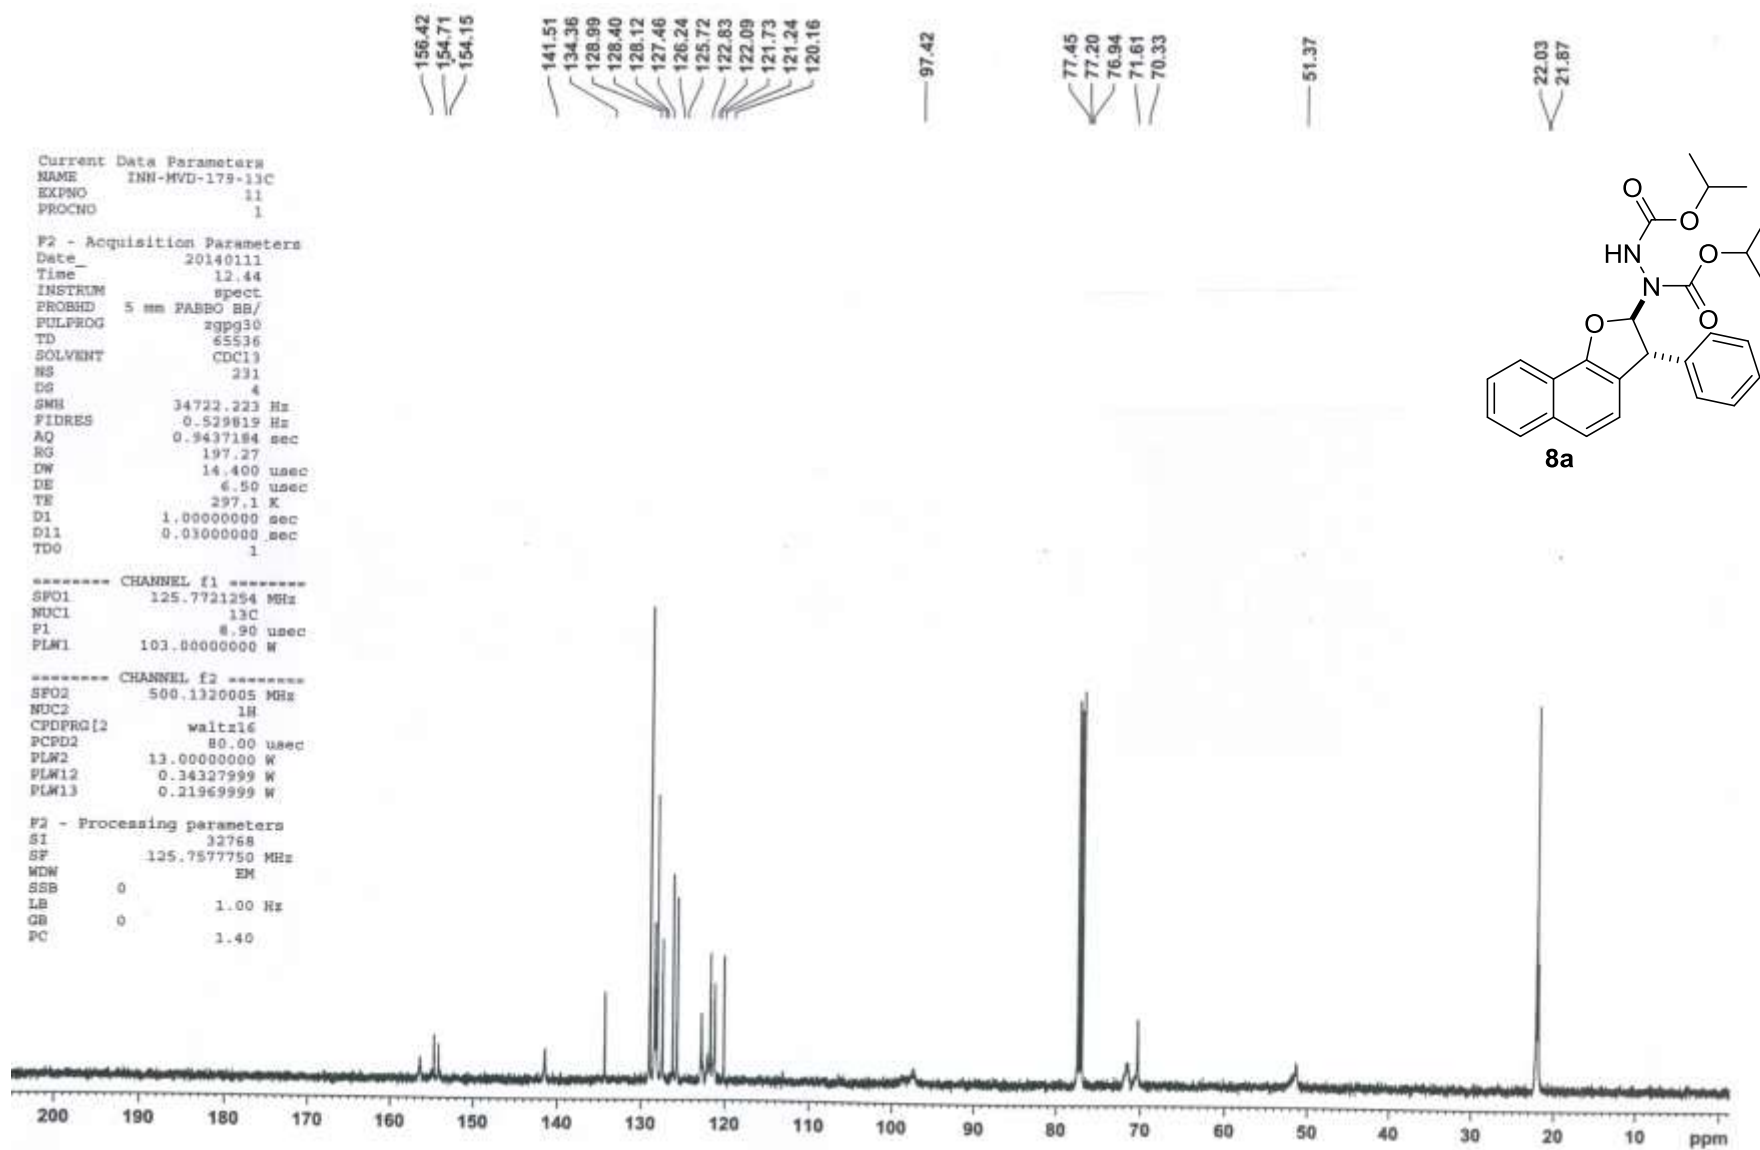

Figure S64.  $^{13}\text{C}$  NMR Spectrum of **8a**

```

NAME      INN-MVD-154--1H
EXPNO     1
PROCNO    1
Date_     20140104
Time      0.51
INSTRUM   spect
PROBHD    5 mm SRE 1H/D-
PULPROG   sg30
TD        65536
SOLVENT   CDCl3
NS        14
DS        0
SWH       8223.685 Hz
FIDRES    0.125483 Hz
AQ        3.9846387 sec
RG        90.5
DW        60.800 usec
DE        6.50 usec
TE        296.8 K
D1        1.00000000 sec
TD0       1

```

```

===== CHANNEL f1 =====
NUC1      1H
P1        6.75 usec
PL1       -3.00 dB
PL1W      16.73965454 W
SFO1      400.1324710 MHz
SI        32768
SF        400.1300102 MHz
WDW       EM
SSB       0
LB        0.30 Hz
GB        0
PC        1.00

```

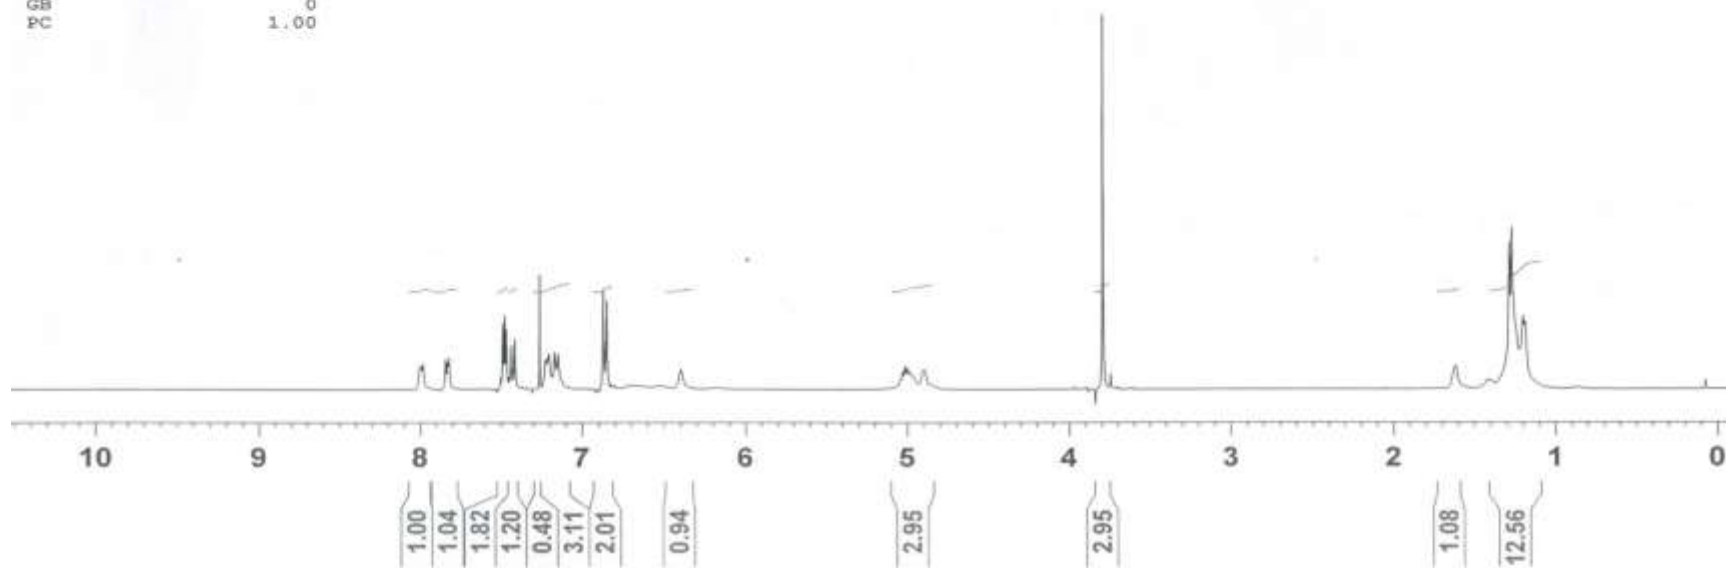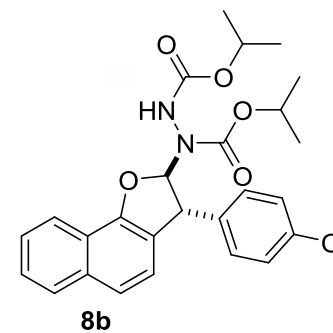

Figure S65. <sup>1</sup>H NMR Spectrum of **8b**

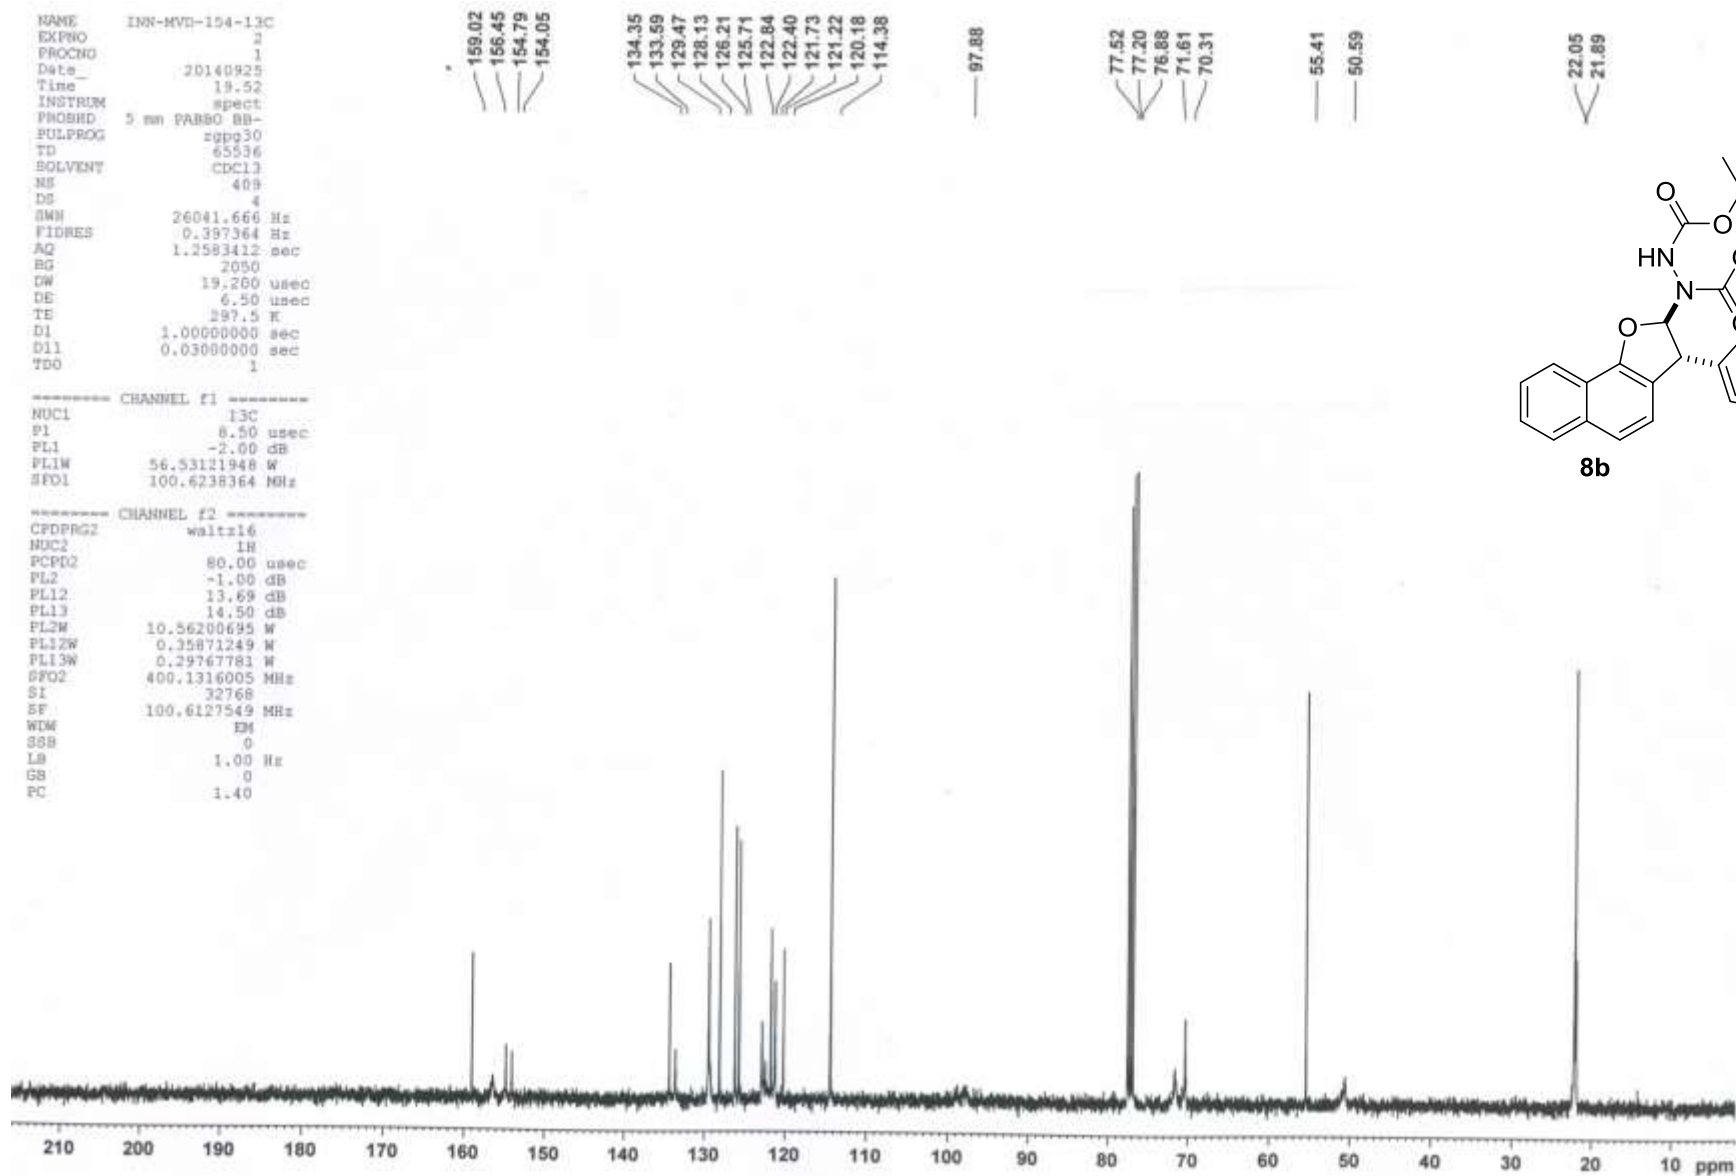

Figure S66. <sup>13</sup>C NMR Spectrum of **8b**

Current Data Parameters  
NAME INN-MVD-158-1H  
EXPNO 1  
PROCNO 1

F2 - Acquisition Parameters  
Date\_ 20140921  
Time 16.45  
INSTRUM spect  
PROBHD 5 mm PABBO BB/  
PULPROG zg30  
TD 65536  
SOLVENT CDCl3  
NS 19  
DS 2  
SWH 10000.000 Hz  
FIDRES 0.152588 Hz  
AQ 3.2767999 sec  
RG 30.72  
DW 50.000 usec  
DE 6.50 usec  
TE 298.2 K  
D1 1.00000000 sec  
TDO 1

----- CHANNEL f1 -----  
SFO1 500.1330885 MHz  
NUC1 1H  
P1 13.00 usec  
PLW1 13.00000000 W

F2 - Processing parameters  
SI 65536  
SF 500.1300114 MHz  
WDW EM  
SSB 0  
LB 0.30 Hz  
GB 0  
PC 1.00

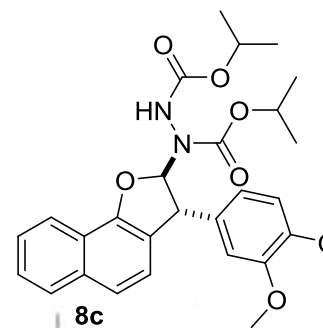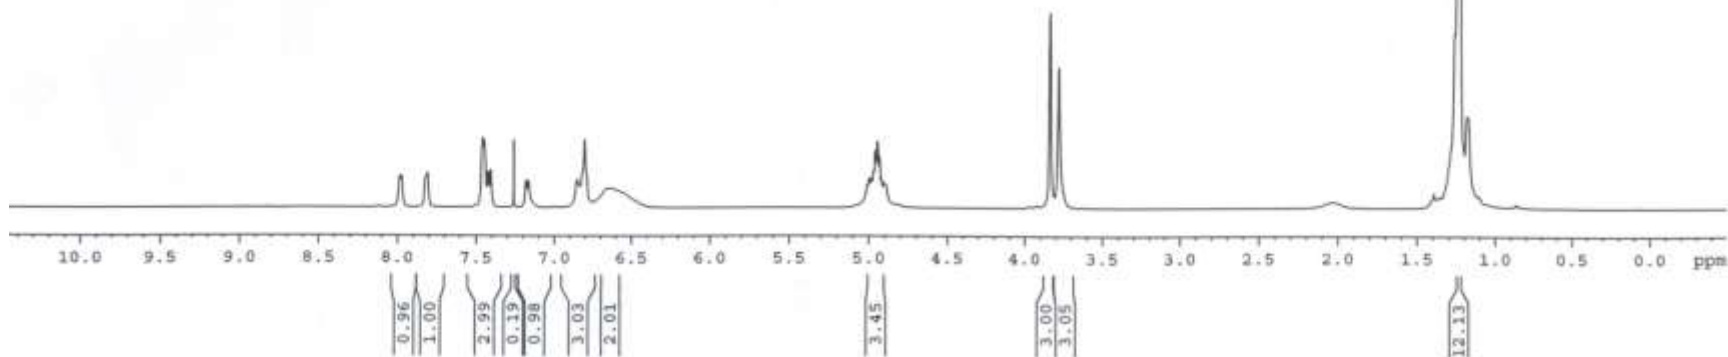

Figure S67. <sup>1</sup>H NMR Spectrum of **8c**

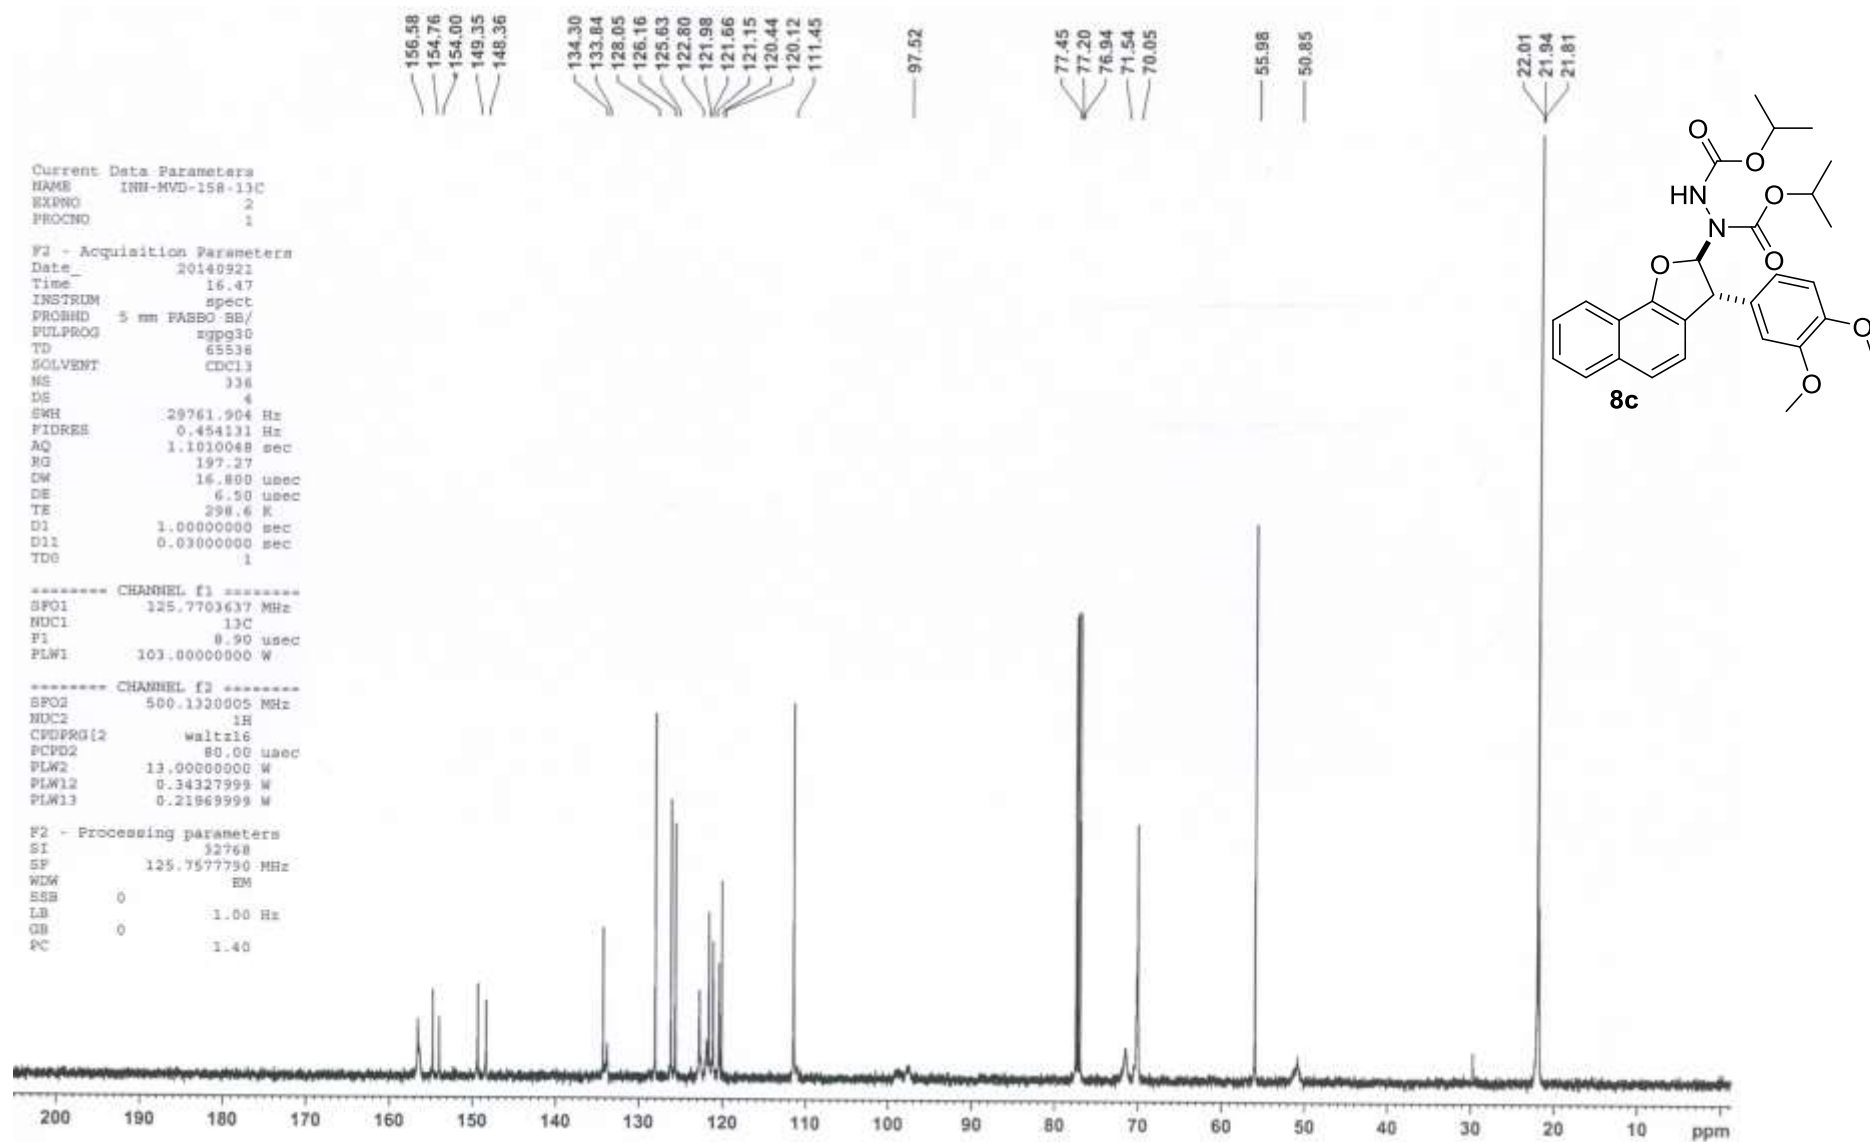

Figure S68.  $^{13}\text{C}$  NMR Spectrum of **8c**

```

Current Data Parameters
NAME      INN-MVD-100-1H
EXPNO     1
PROCNO    1

F2 - Acquisition Parameters
Date_     20140923
Time      13.21
INSTRUM   spect
PROBHD    5 mm PABBO BB/
PULPROG   zg30
TD         65536
SOLVENT   CDCl3
NS         15
DS         2
SWH        10000.000 Hz
FIDRES     0.152580 Hz
AQ         3.2767999 sec
RG         30.72
DW         50.000 usec
DE         6.50 usec
TE         296.1 K
D1         1.00000000 sec
TDO        1

***** CHANNEL f1 *****
SFO1      500.1330885 MHz
NUC1       1H
P1         13.00 usec
PLW1       13.00000000 W

F2 - Processing parameters
SI         65536
SF         500.1300123 MHz
WDW        EM
SSB        0
LB         0.30 Hz
GB         0
PC         1.00

```

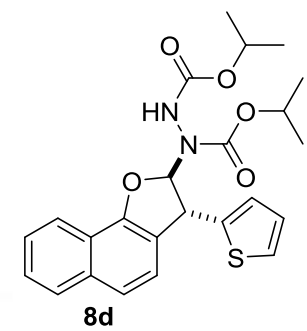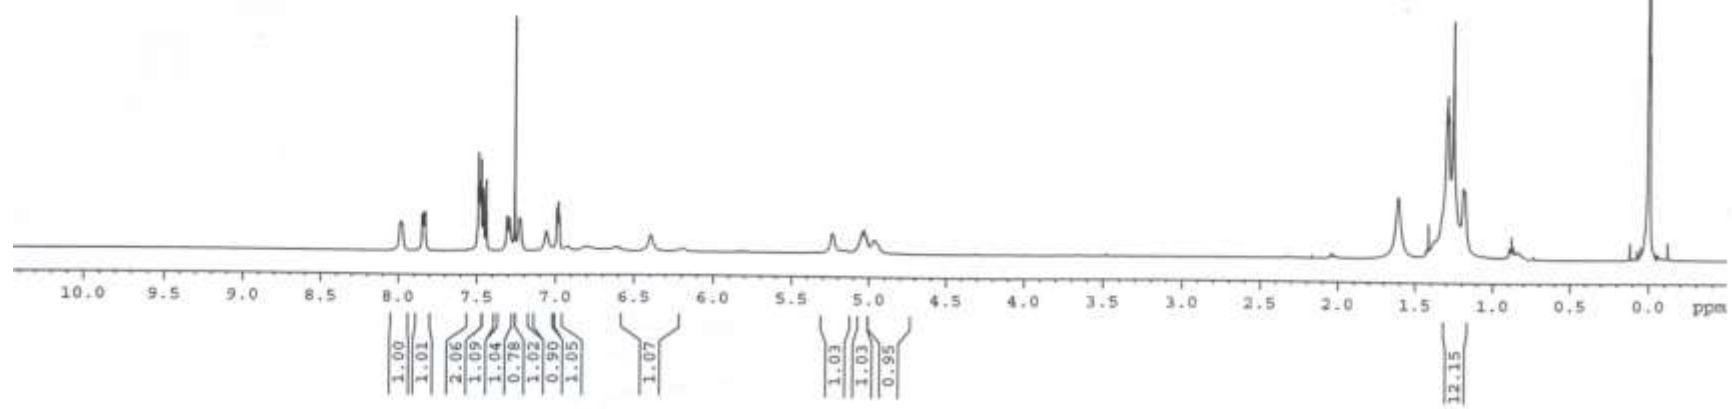

Figure S69. <sup>1</sup>H NMR Spectrum of **8d**

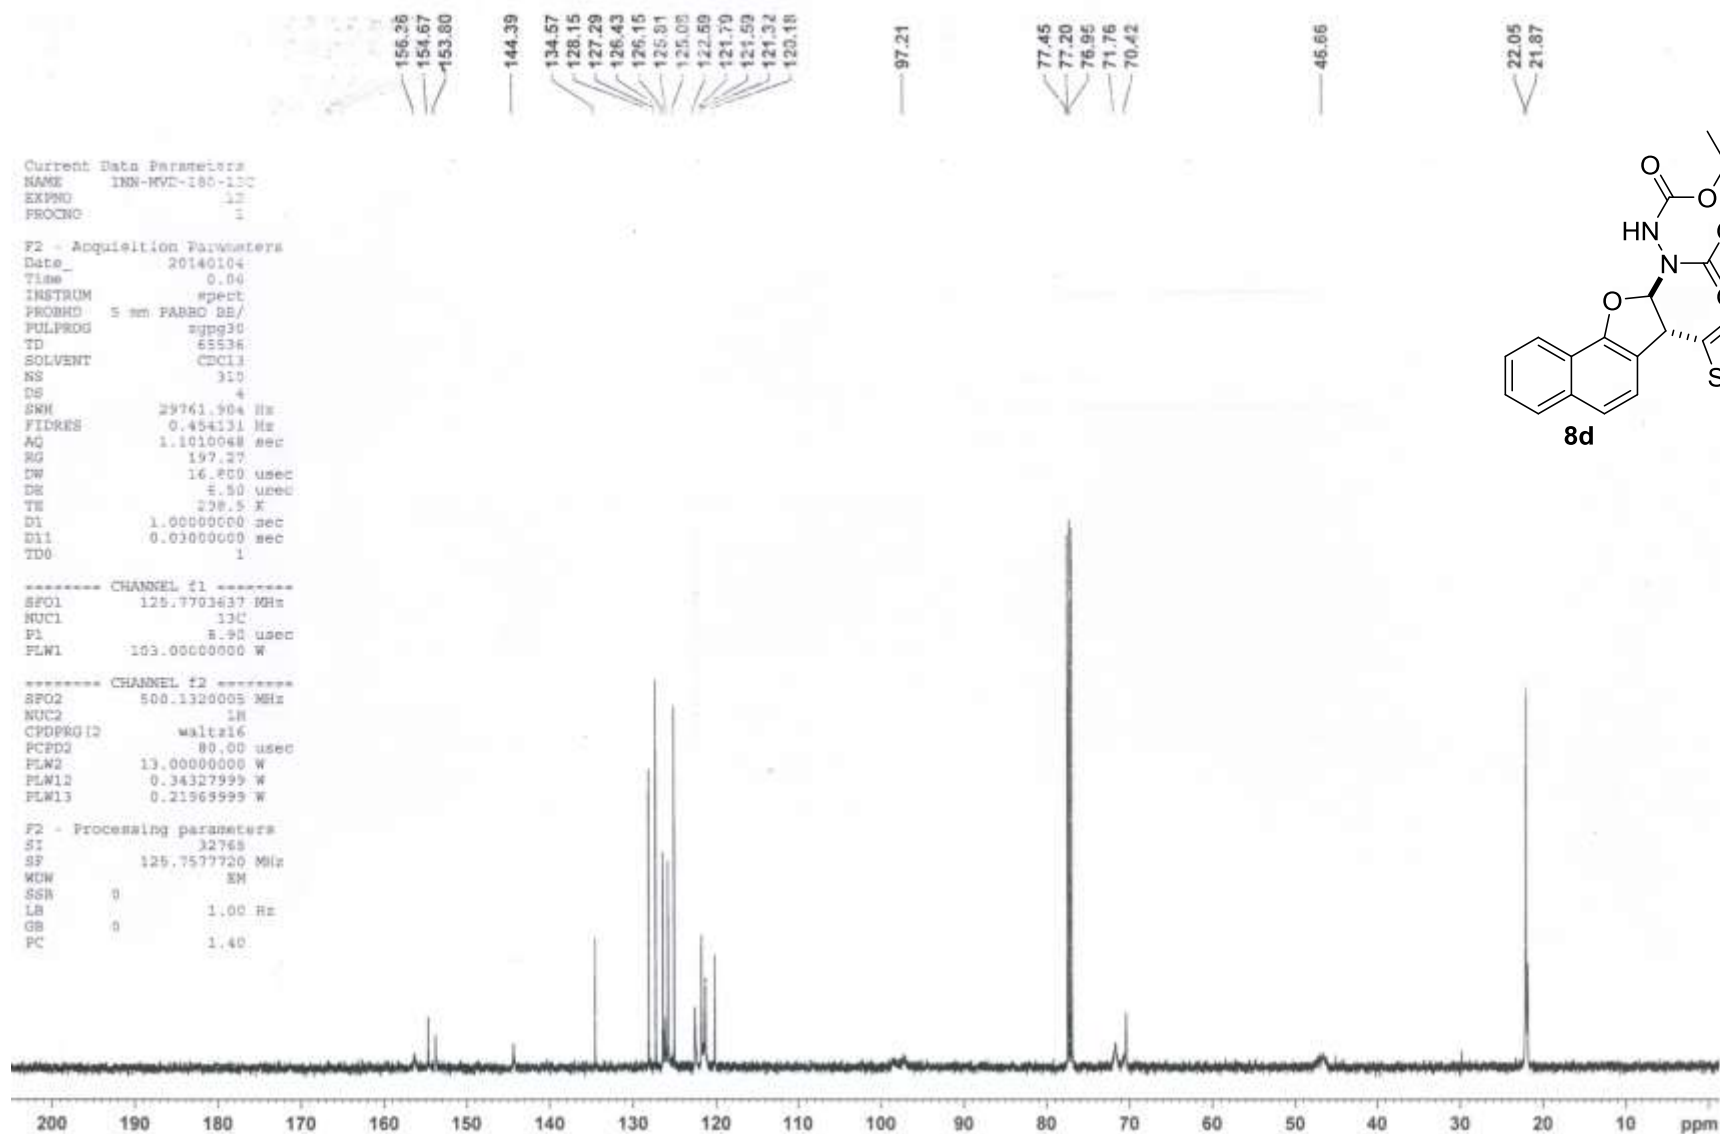

Figure S70. <sup>13</sup>C NMR Spectrum of **8d**



```

NAME      INN-MVD-161-1H
EXPNO     7
PROCNO    1
Date_     20141014
Time      18.51
INSTRUM   spect
PROBHD    5 mm PABBO BB-
PULPROG   zg30
TD        54274
SOLVENT   CDCl3
NS        30
DS        0
SWH       8223.685 Hz
FIDRES    0.151522 Hz
AQ        3.2999091 sec
RG        32
DW        60.800 usec
DE        6.50 usec
TE        297.3 K
D1        1.00000000 sec
TDO      1

```

```

----- CHANNEL f1 -----
NUC1      1H
P1        14.75 usec
PL1       -1.00 dB
PL1W      10.56200695 W
SFO1      400.1324710 MHz
SI        32768
SF        400.1300172 MHz
WDW       EM
SSB       0
LB        0.30 Hz
GB        0
PC        1.00

```

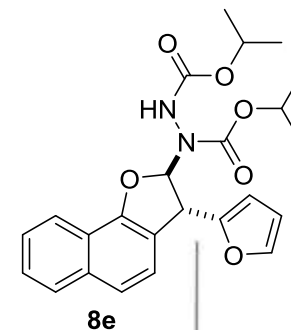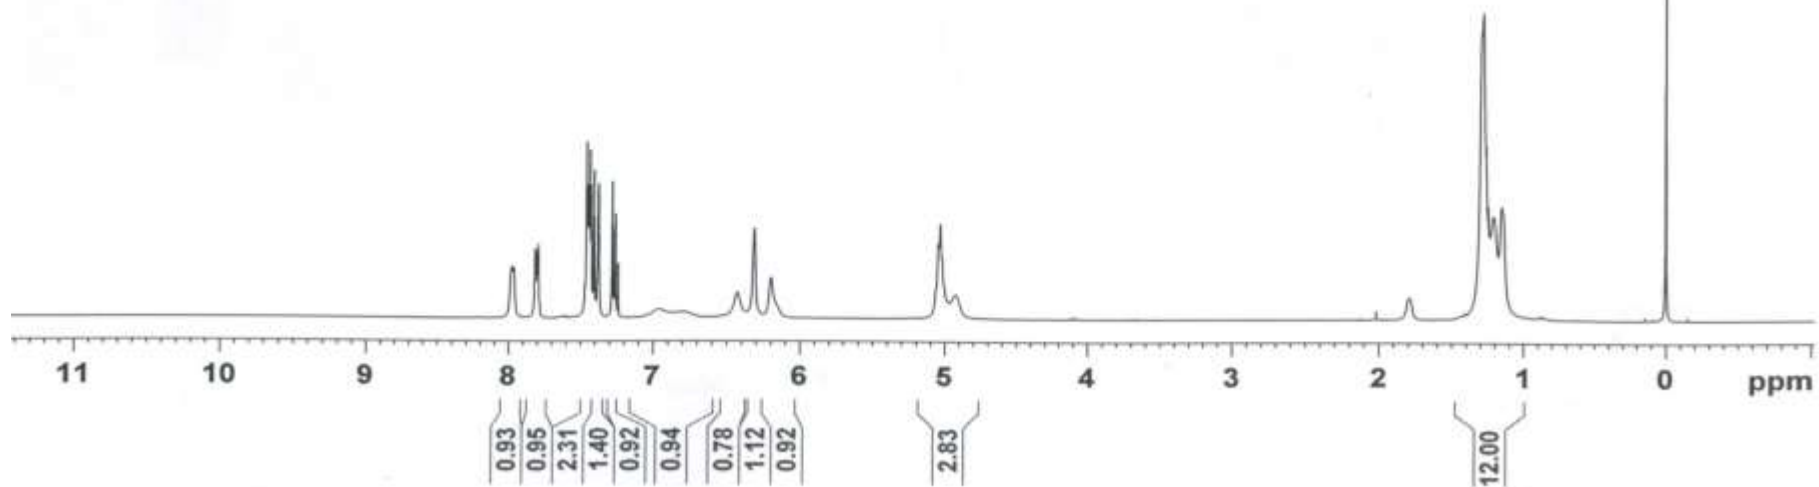

Figure S71.  $^1\text{H}$  NMR Spectrum of **8e**

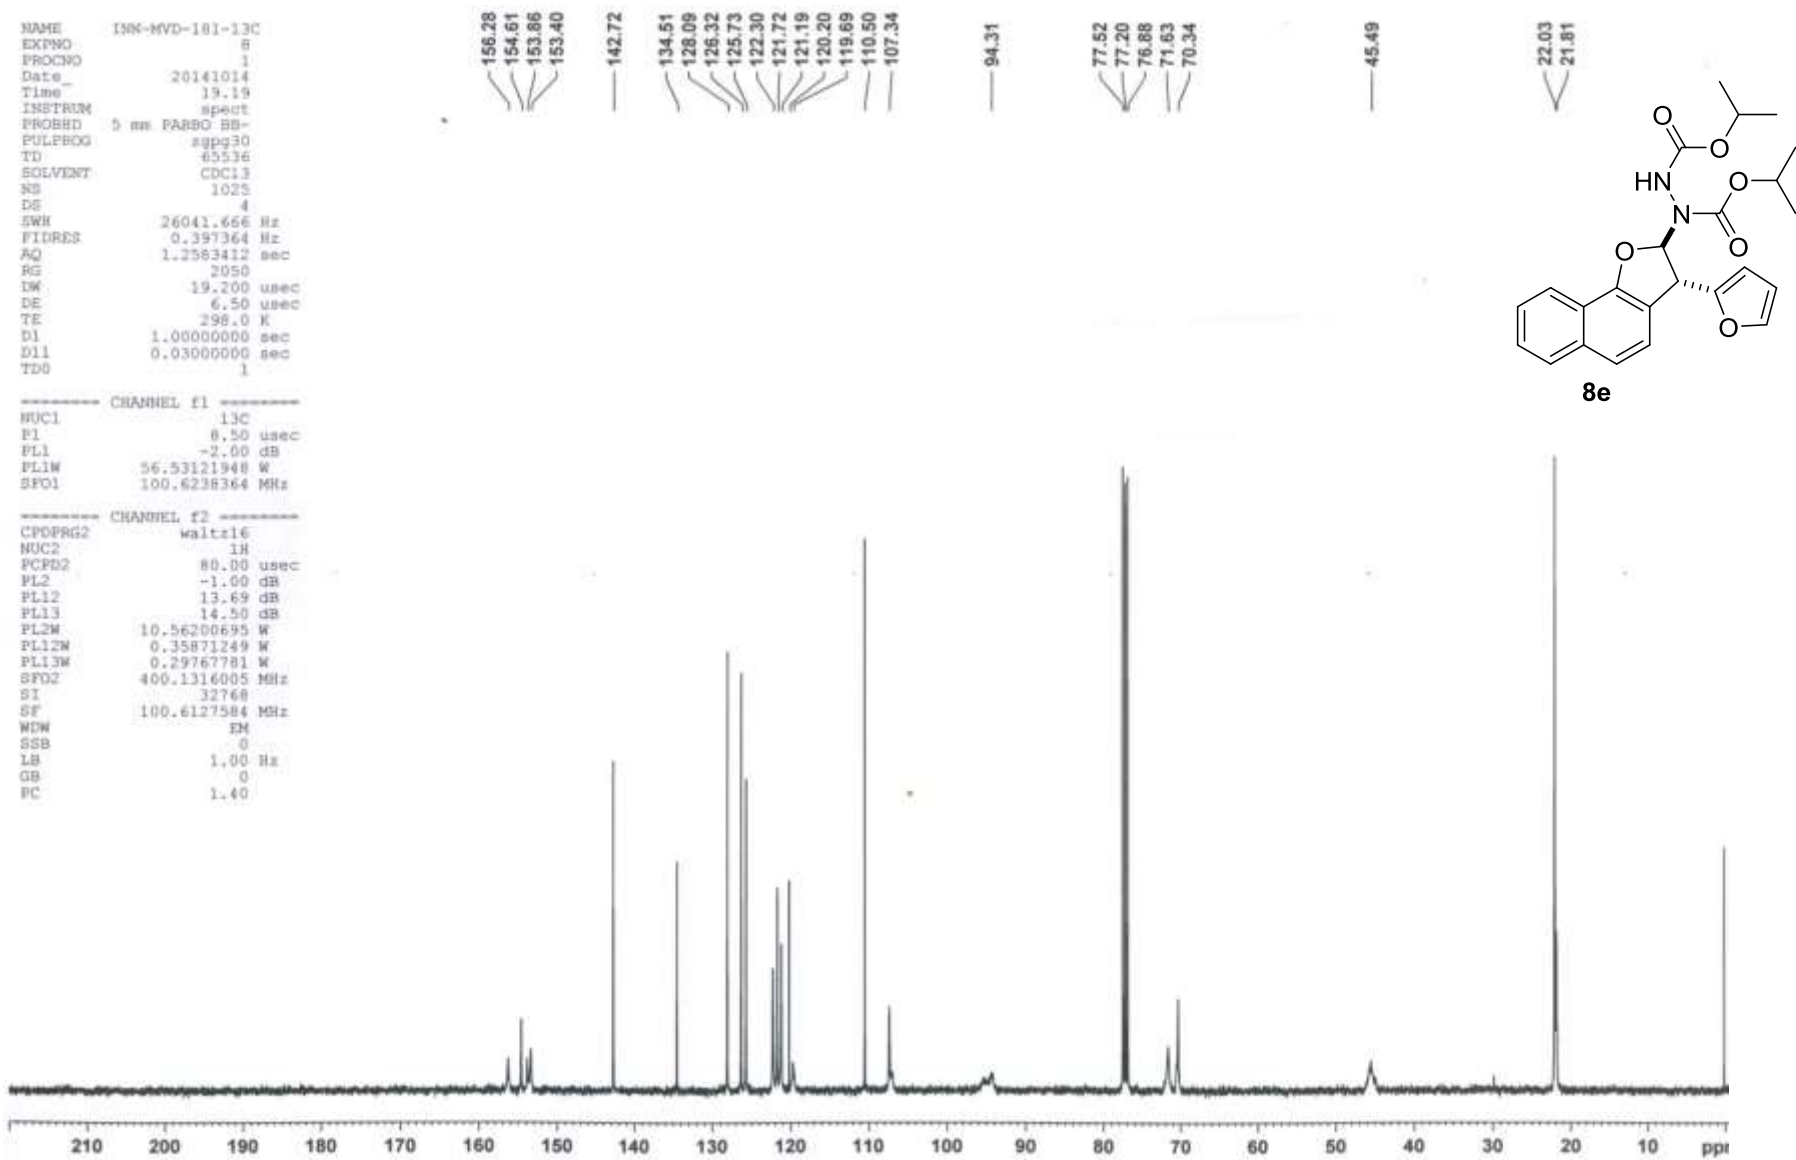

Figure S72. <sup>13</sup>C NMR Spectrum of **8e**

```

Current Data Parameters
NAME      INN-MVD-182-1H
EXPNO    1
PROCNO   1

F2 - Acquisition Parameters
Date_    20141014
Time     19.08
INSTRUM  spect
PROBHD   5 mm PABBO BB/
PULPROG  zg30
TD       65536
SOLVENT  CDCl3
NS       25
DS       2
SWH      10000.000 Hz
FIDRES   0.152588 Hz
AQ       3.2767999 sec
RG       30.72
DW       50.000 usec
DE       6.50 usec
TE       297.2 K
D1       1.00000000 sec
TDO      1

***** CHANNEL f1 *****
SFO1    500.1330885 MHz
NUC1     1H
P1      13.00 usec
PL1     13.00000000 W

F2 - Processing parameters
SI      65536
SF      500.1330117 MHz
WDW     EM
SSB     0
LB      0.30 Hz
GB      0
PC      1.00

```

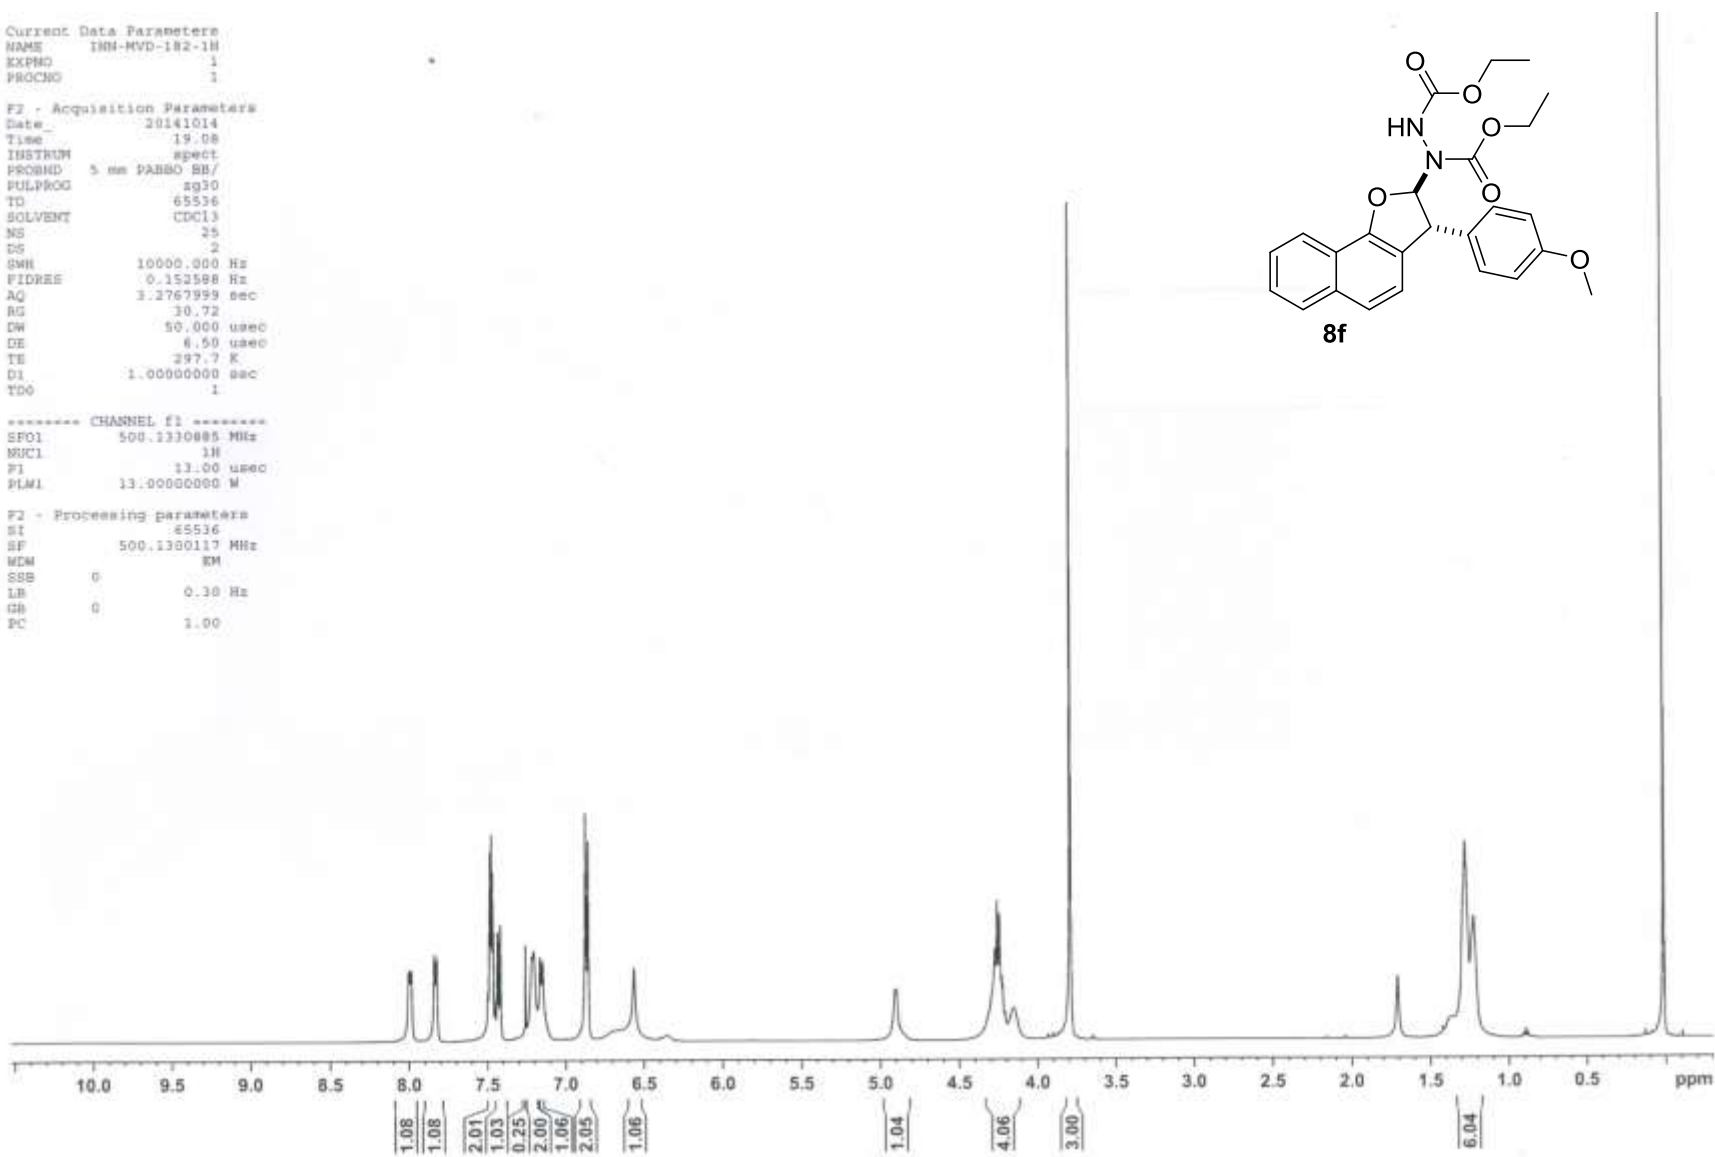

Figure S73. <sup>1</sup>H NMR Spectrum of **8f**

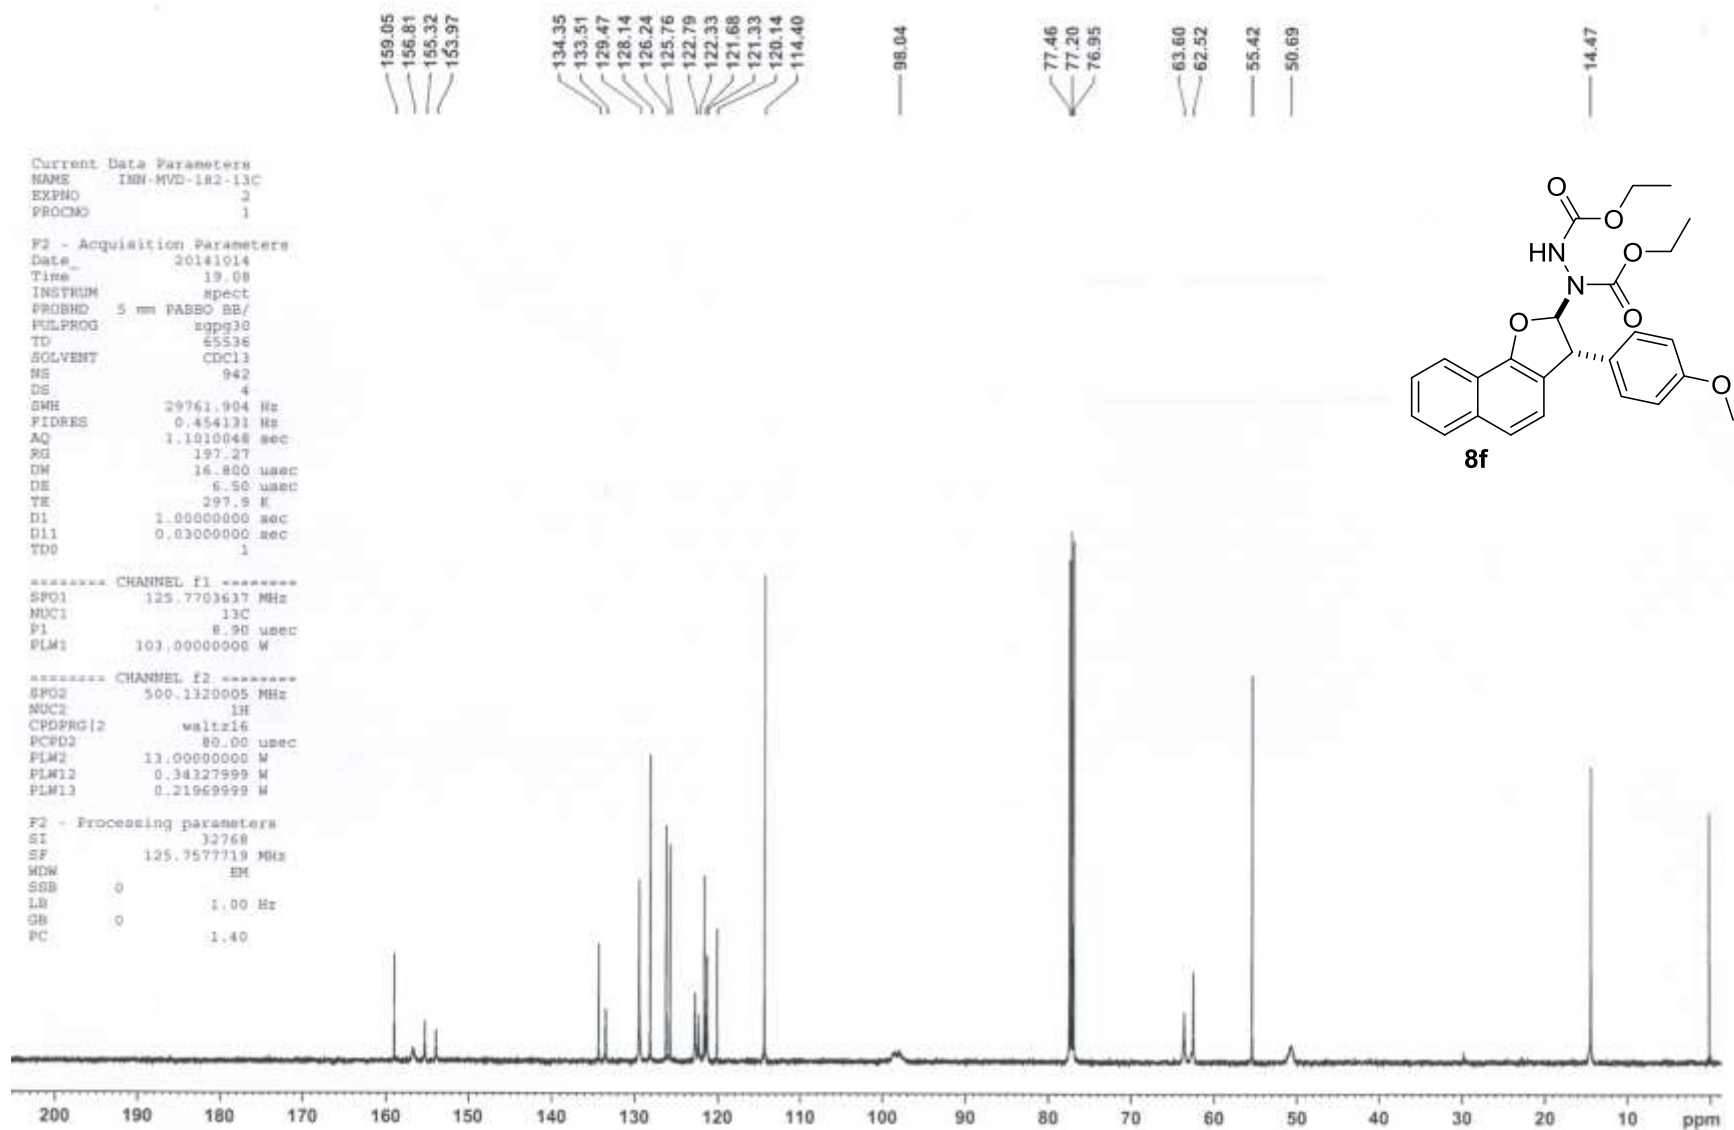

Figure S74.  $^{13}\text{C}$  NMR Spectrum of **8f**

```

NAME      INB-MVD-173-1H
EXPNO     4
PROCNO    1
Date_     20150305
Time      19.07
INSTRUM   spect
PROBHD    5 mm PABBO BB-
PULPROG   zg30
TD        54274
SOLVENT   CDCl3
NS        30
DS        0
SWH       8223.685 Hz
FIDRES    0.151522 Hz
AQ        3.2999091 sec
RG        32
DW        60.800 usec
DE        6.50 usec
TE        295.7 K
D1        1.00000000 sec
ZDO       1

```

```

----- CHANNEL f1 -----
NUC1      1H
P1        14.75 usec
PL1       -1.00 dB
PL1W      10.56200695 W
SFO1      400.1324710 MHz
SI        32768
SF        400.1300097 MHz
MDW       EM
SSB       0
LB        0.30 Hz
GB        0
PC        1.00

```

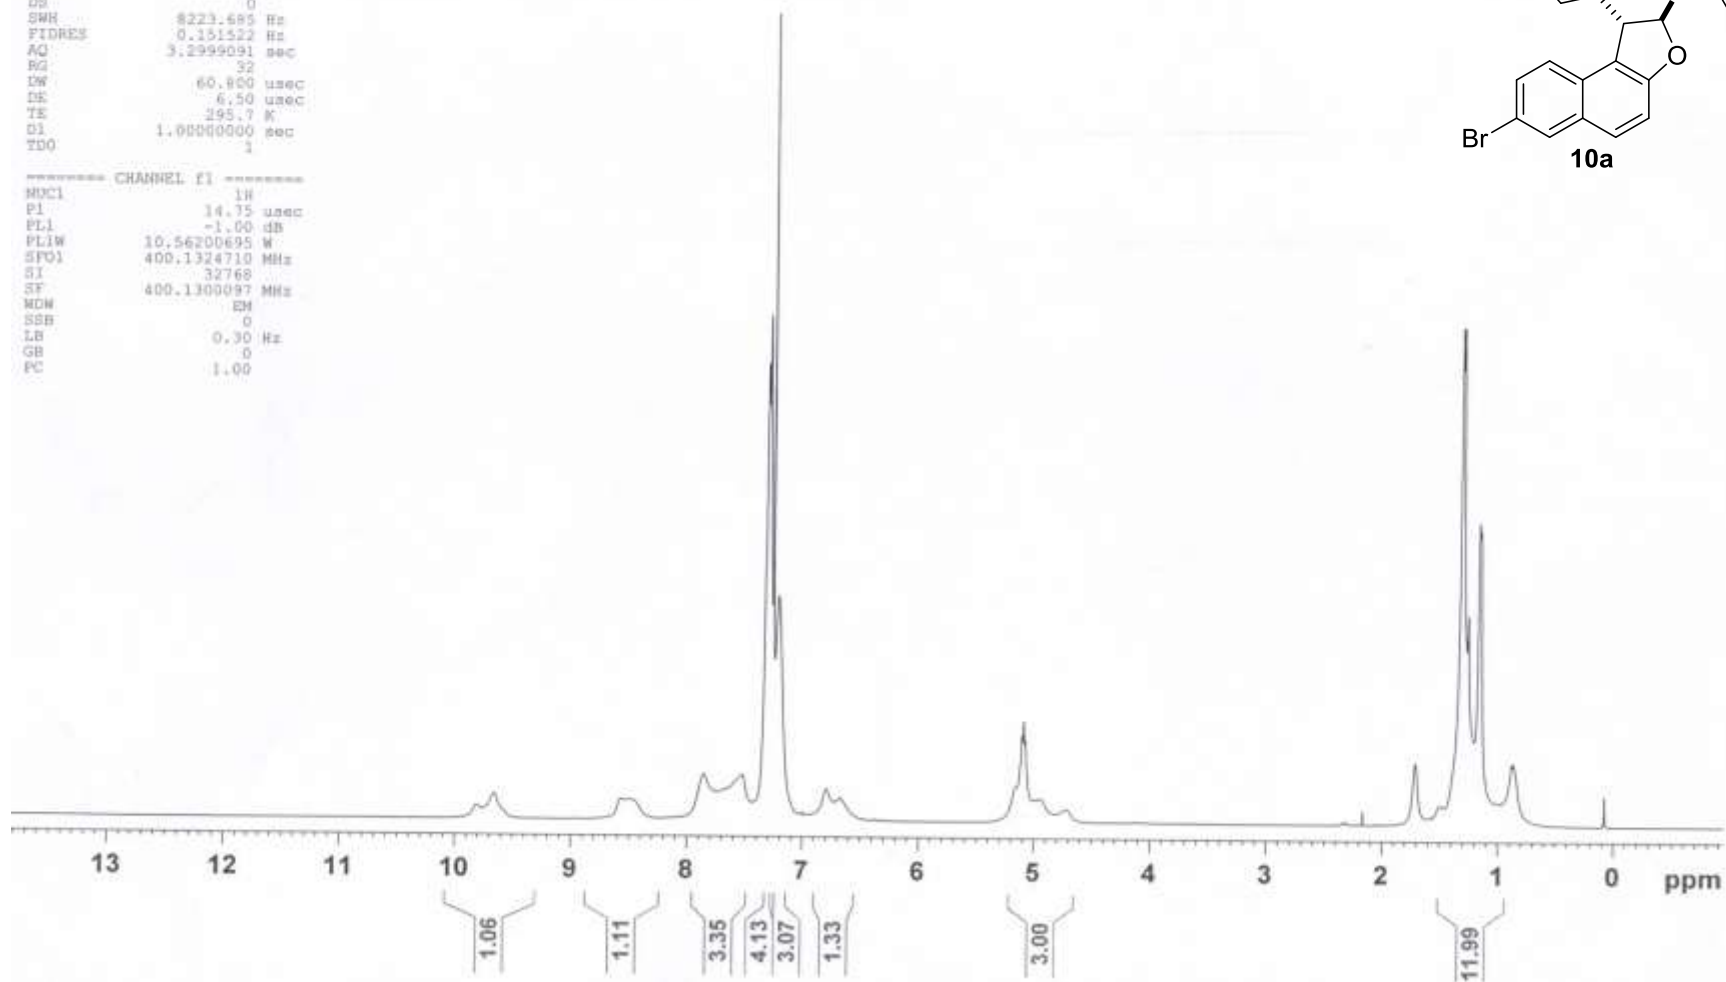

Figure S75. <sup>1</sup>H NMR Spectrum of **10a**

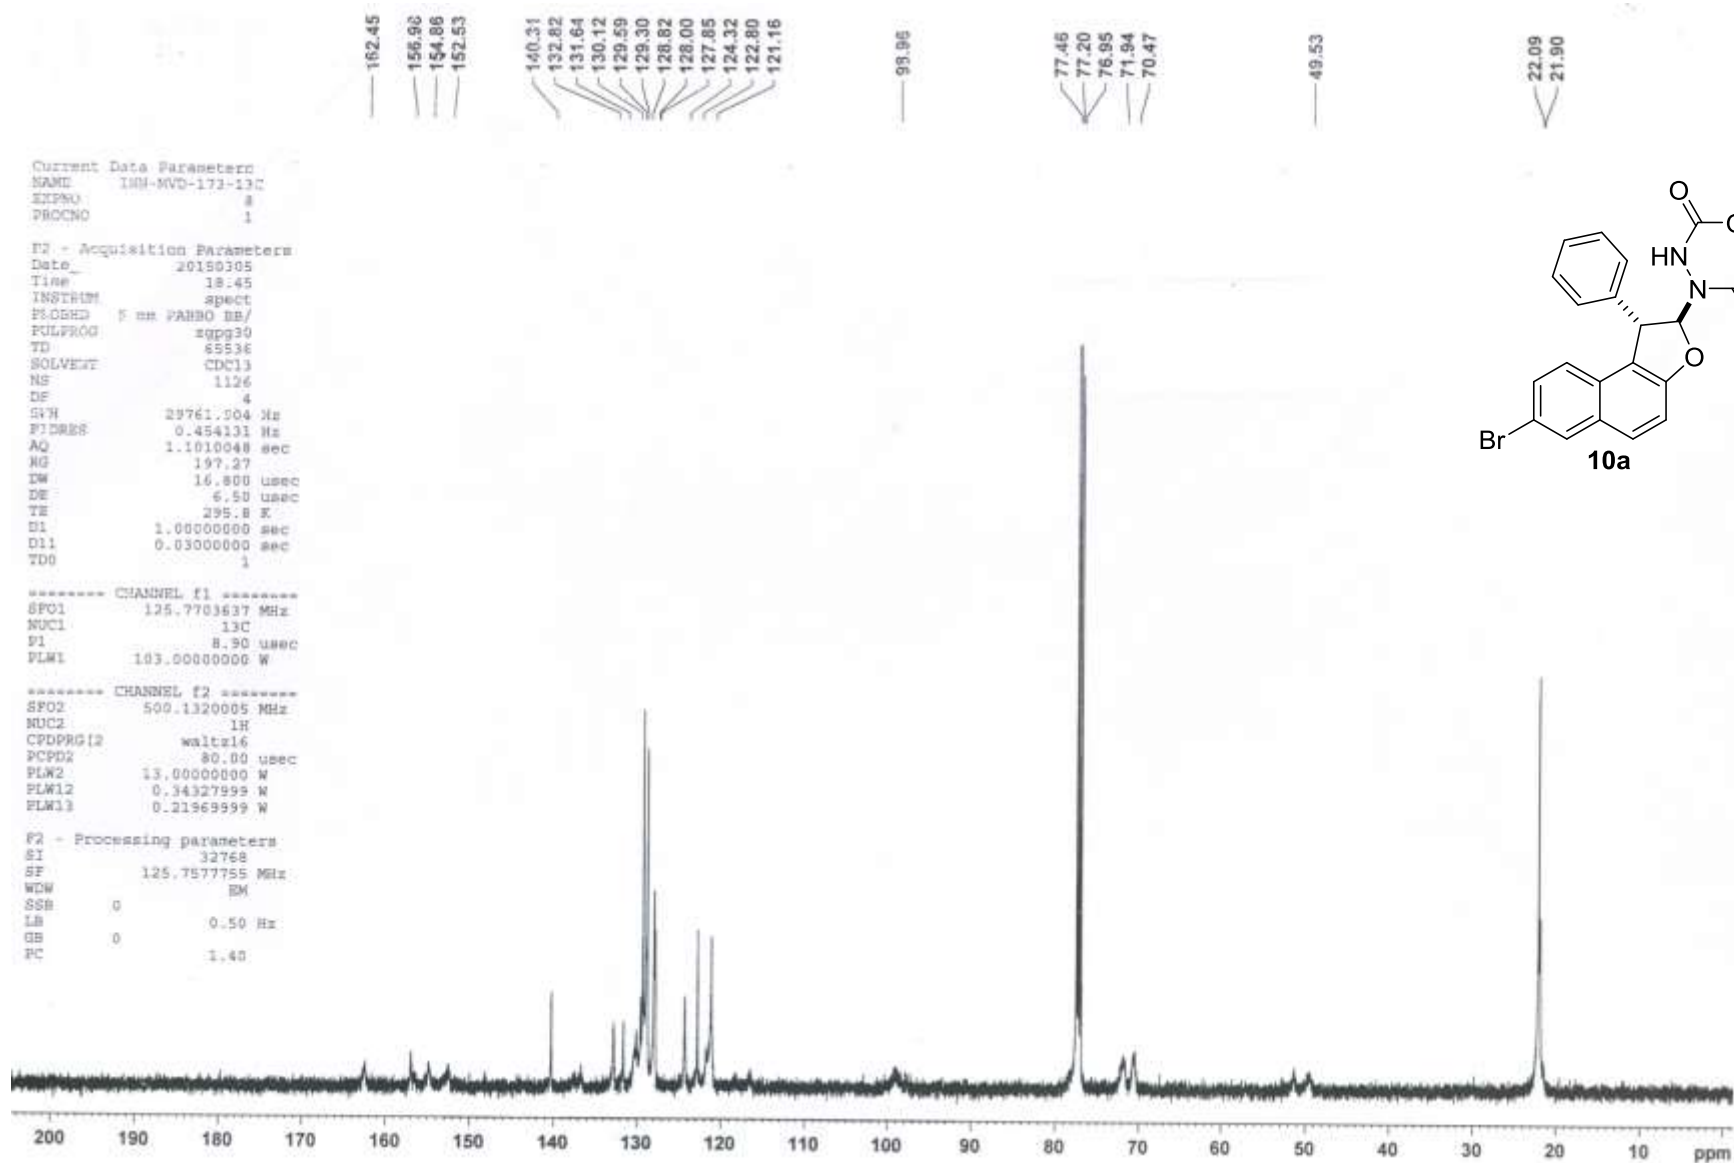

Figure S76.  $^{13}\text{C}$  NMR Spectrum of 10a

Current Data Parameters  
NAME INN-MVD-172-1H  
EXPNO 4  
PROCNO 1

F2 - Acquisition Parameters  
Date\_ 20150307  
Time\_ 16.56  
INSTRUM spect  
PROBHD 5 mm PABBO BB/  
PULPROG zg30  
TD 65536  
SOLVENT CDCl3  
NS 40  
DS 2  
SWH 10000.000 Hz  
FIDRES 0.152588 Hz  
AQ 3.2767999 sec  
RG 30.72  
DW 50.000 usec  
DE 6.50 usec  
TE 294.1 K  
D1 1.00000000 sec  
TDC 1

\*\*\*\*\* CHANNEL f1 \*\*\*\*\*  
SFO1 500.1330885 MHz  
NUC1 1H  
P1 13.00 usec  
PLW1 13.00000000 W

F2 - Processing parameters  
SI 65536  
SF 500.1300122 MHz  
WDW EM  
SSB 0  
LB 0.30 Hz  
GB 0  
PC 1.00

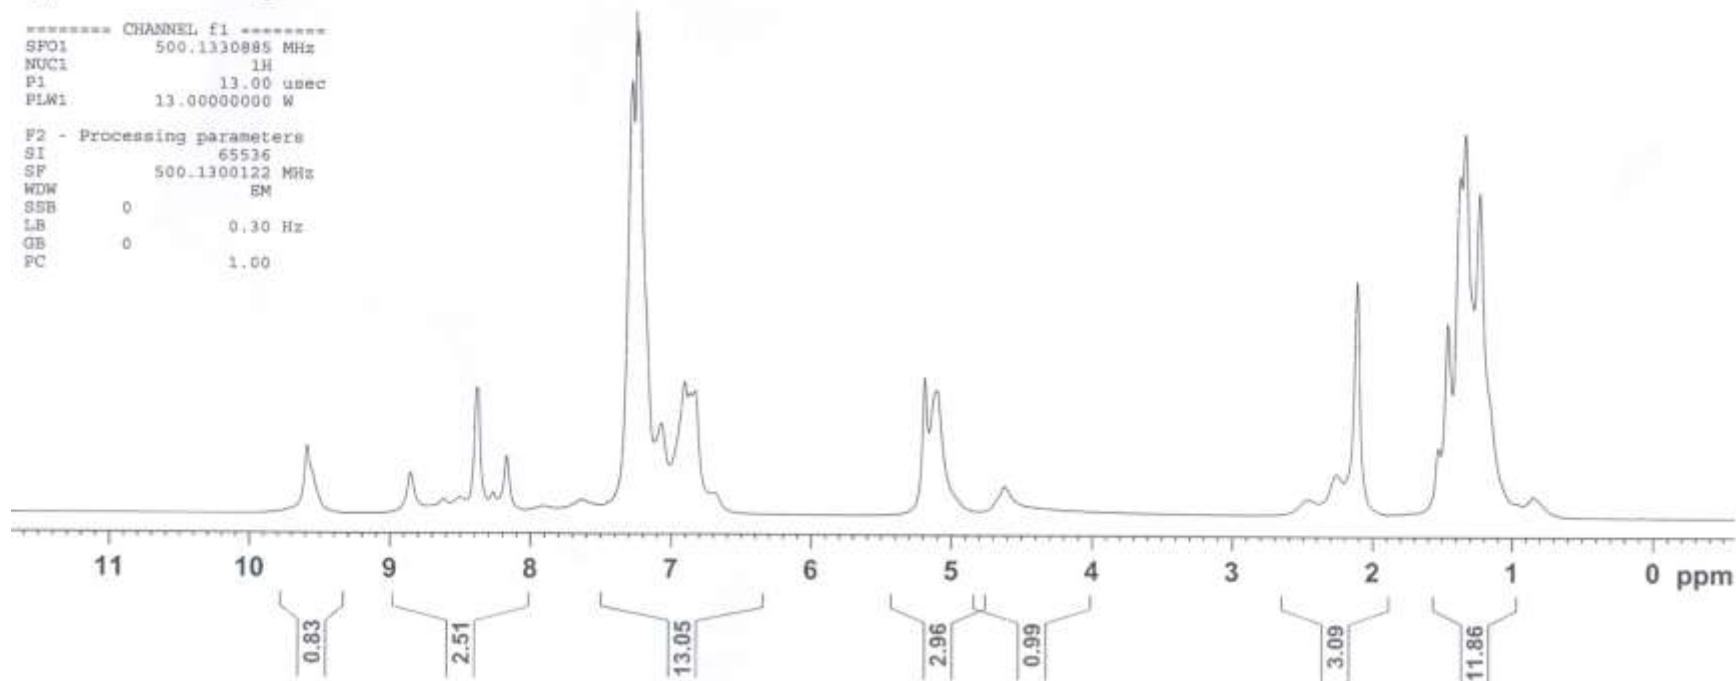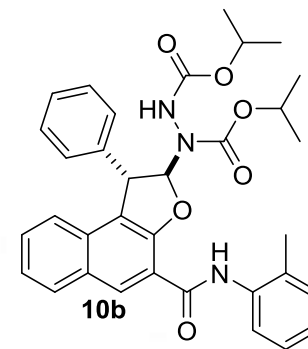

Current Data Parameters  
NAME INX-MVD-172-189223K  
EXPNO 2  
PROCNO 1

F2 - Acquisition Parameters  
Date\_ 20140930  
Time 15.39  
INSTRUM spect  
PROBHD 5 mm PABBO BB/  
PULPROG zg30  
TD 65536  
SOLVENT CDCl3  
NS 50  
DS 2  
SMH 11029.412 Hz  
FIDRES 0.168295 Hz  
AQ 2.9709654 sec  
RG 53.37  
DM 45.333 usec  
DE 6.50 usec  
TE 323.0 K  
D1 1.00000000 sec  
TDO 1

----- CHANNEL f1 -----  
SFO1 500.1340010 Mhz  
NUC1 1H  
P1 13.00 usec  
PLM1 13.00000000 W

F2 - Processing parameters  
SI 65536  
SF 500.1300211 Mhz  
WDW EM  
SSB 0  
LB 0.30 Hz  
GB 0  
PC 1.00

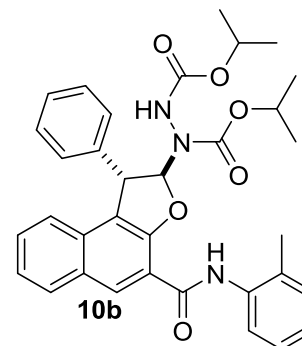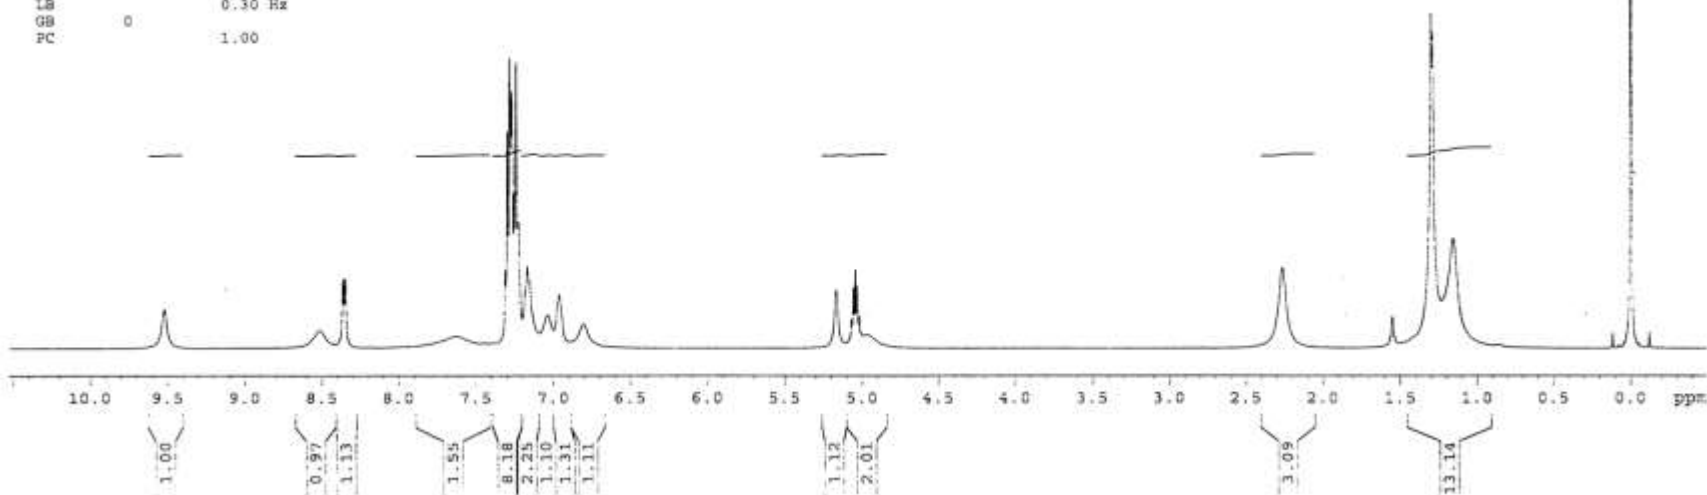

Figure S78. <sup>1</sup>H NMR Spectrum of **10b** at 323 k



Current Data Parameters  
NAME INN-MVD-272-1H@333K  
EXPNO 12  
PROCNO 1

F2 - Acquisition Parameters  
Date\_ 20141001  
Time 17.23  
INSTRUM spect  
PROBHD 5 mm PABBO BB/  
PULPROG zg30  
TD 65536  
SOLVENT DMSO  
NS 20  
DS 0  
SWH 11029.412 Hz  
FIDRES 0.168295 Hz  
AQ 2.9709654 sec  
RG 48.36  
DW 45.333 usec  
DE 6.50 usec  
TE 333.0 K  
SI 1.00000000 sec  
TDO 1

\*\*\*\*\* CHANNEL f1 \*\*\*\*\*  
SFO1 500.1335009 MHz  
NUC1 1H  
P1 13.00 usec  
PLW1 13.00000000 W

F2 Processing parameters  
SI 65536  
SF 500.1300039 MHz  
WDW EM  
SSB 0  
LB 0.30 Hz  
GB 0  
PC 1.00

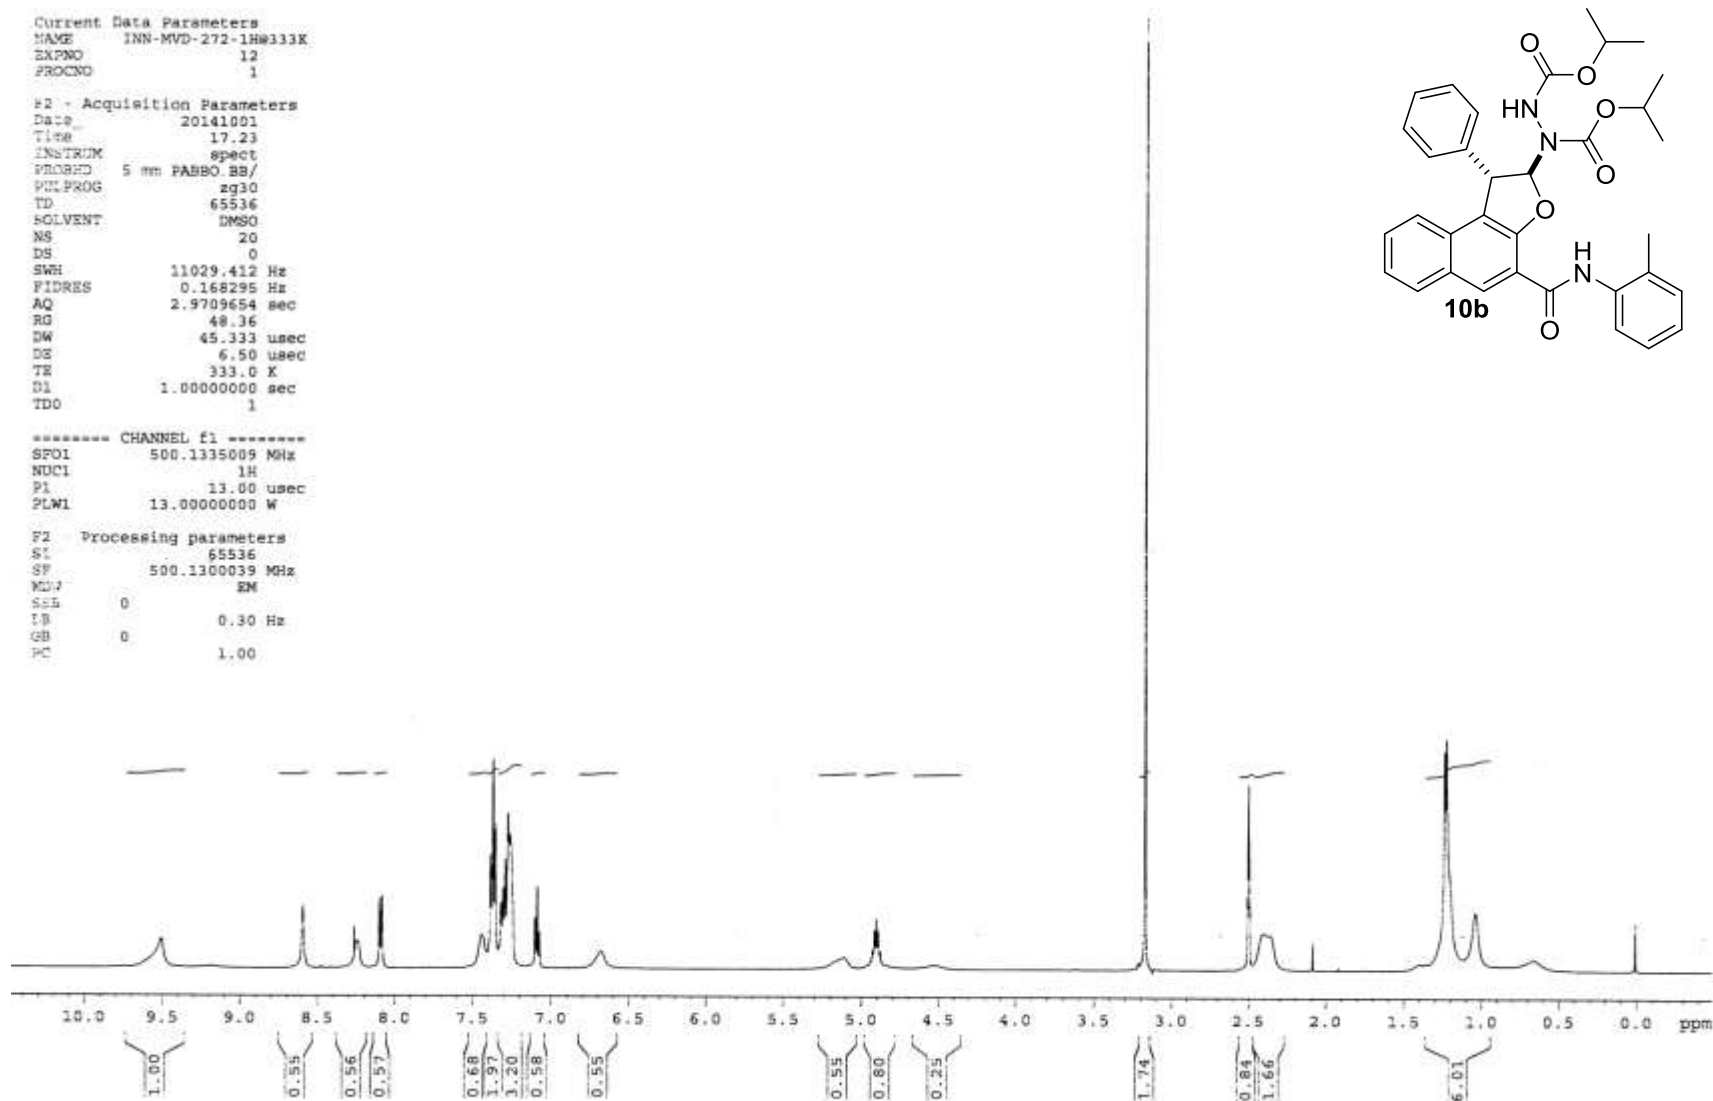

Figure S79. <sup>1</sup>H NMR Spectrum of **10b** at 333 k

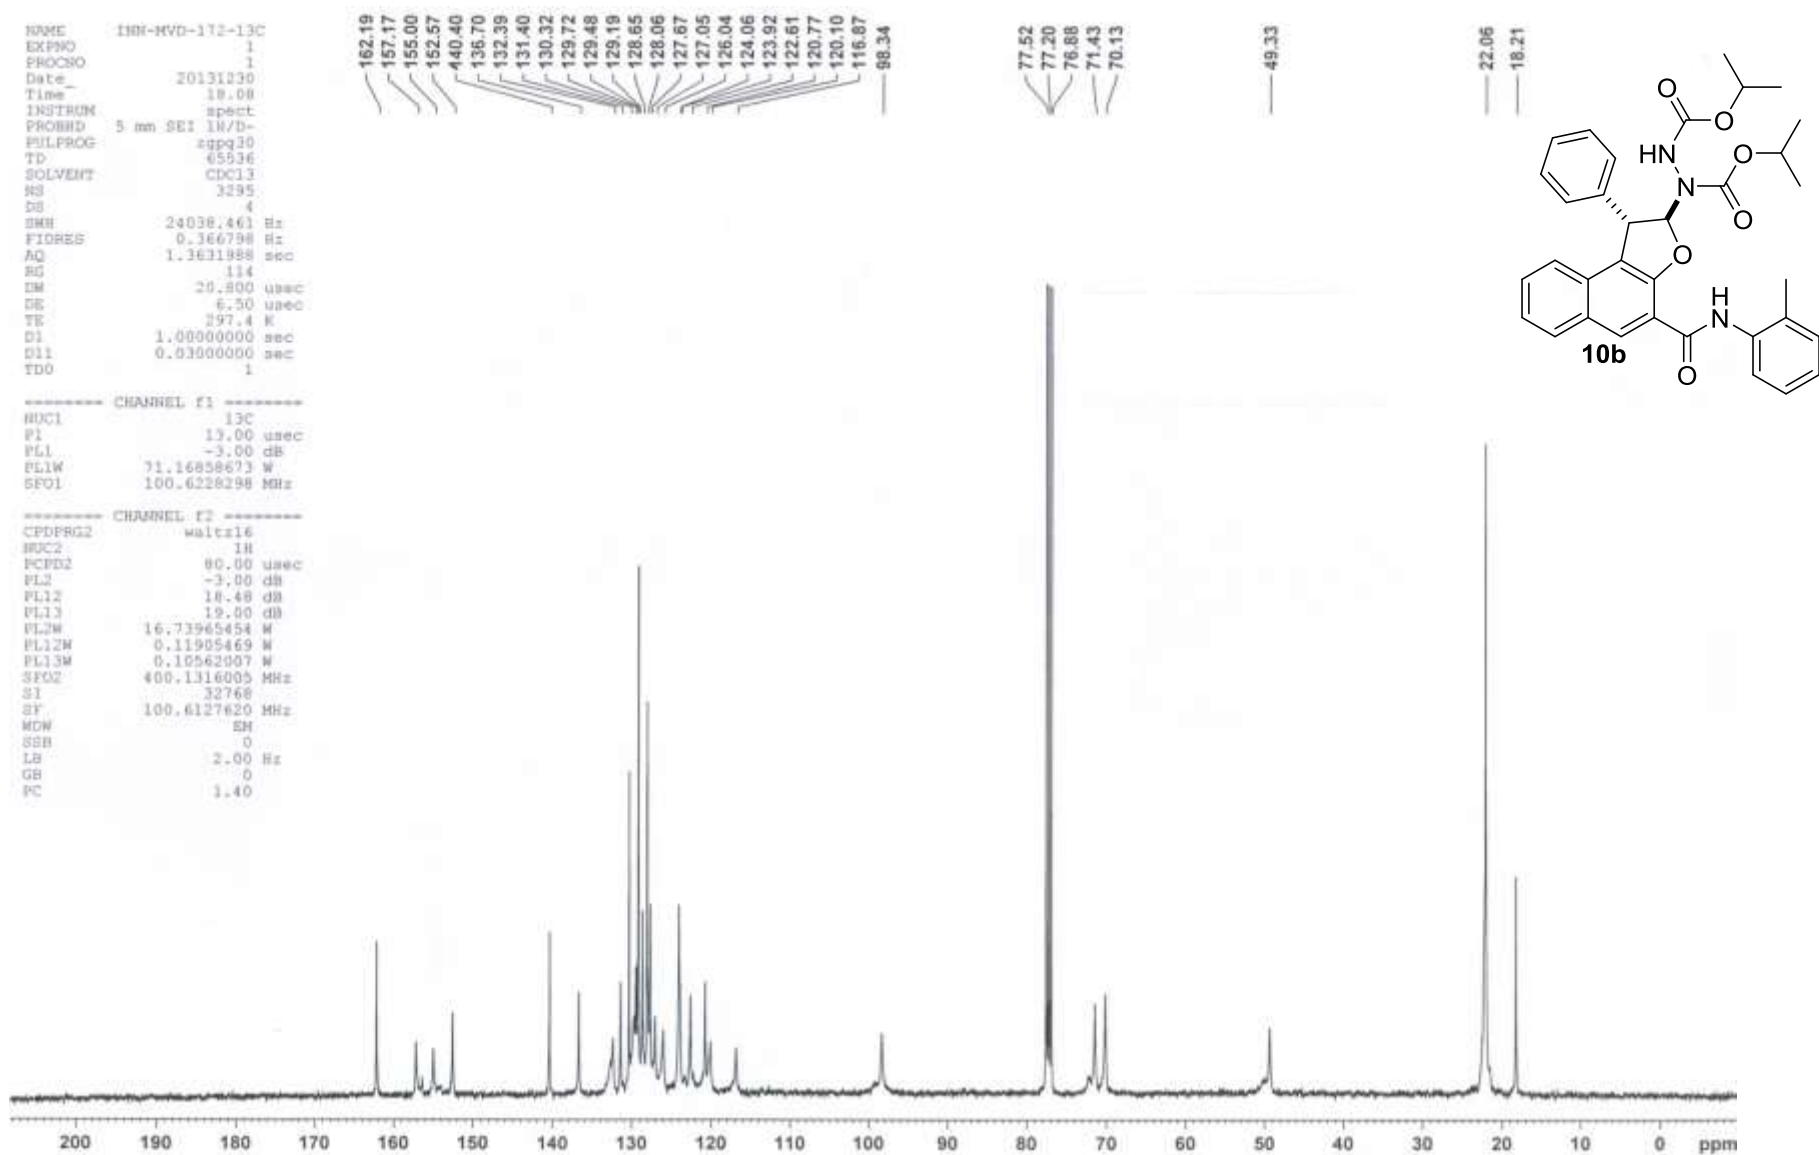

Figure S80.  $^{13}\text{C}$  NMR Spectrum of **10b**

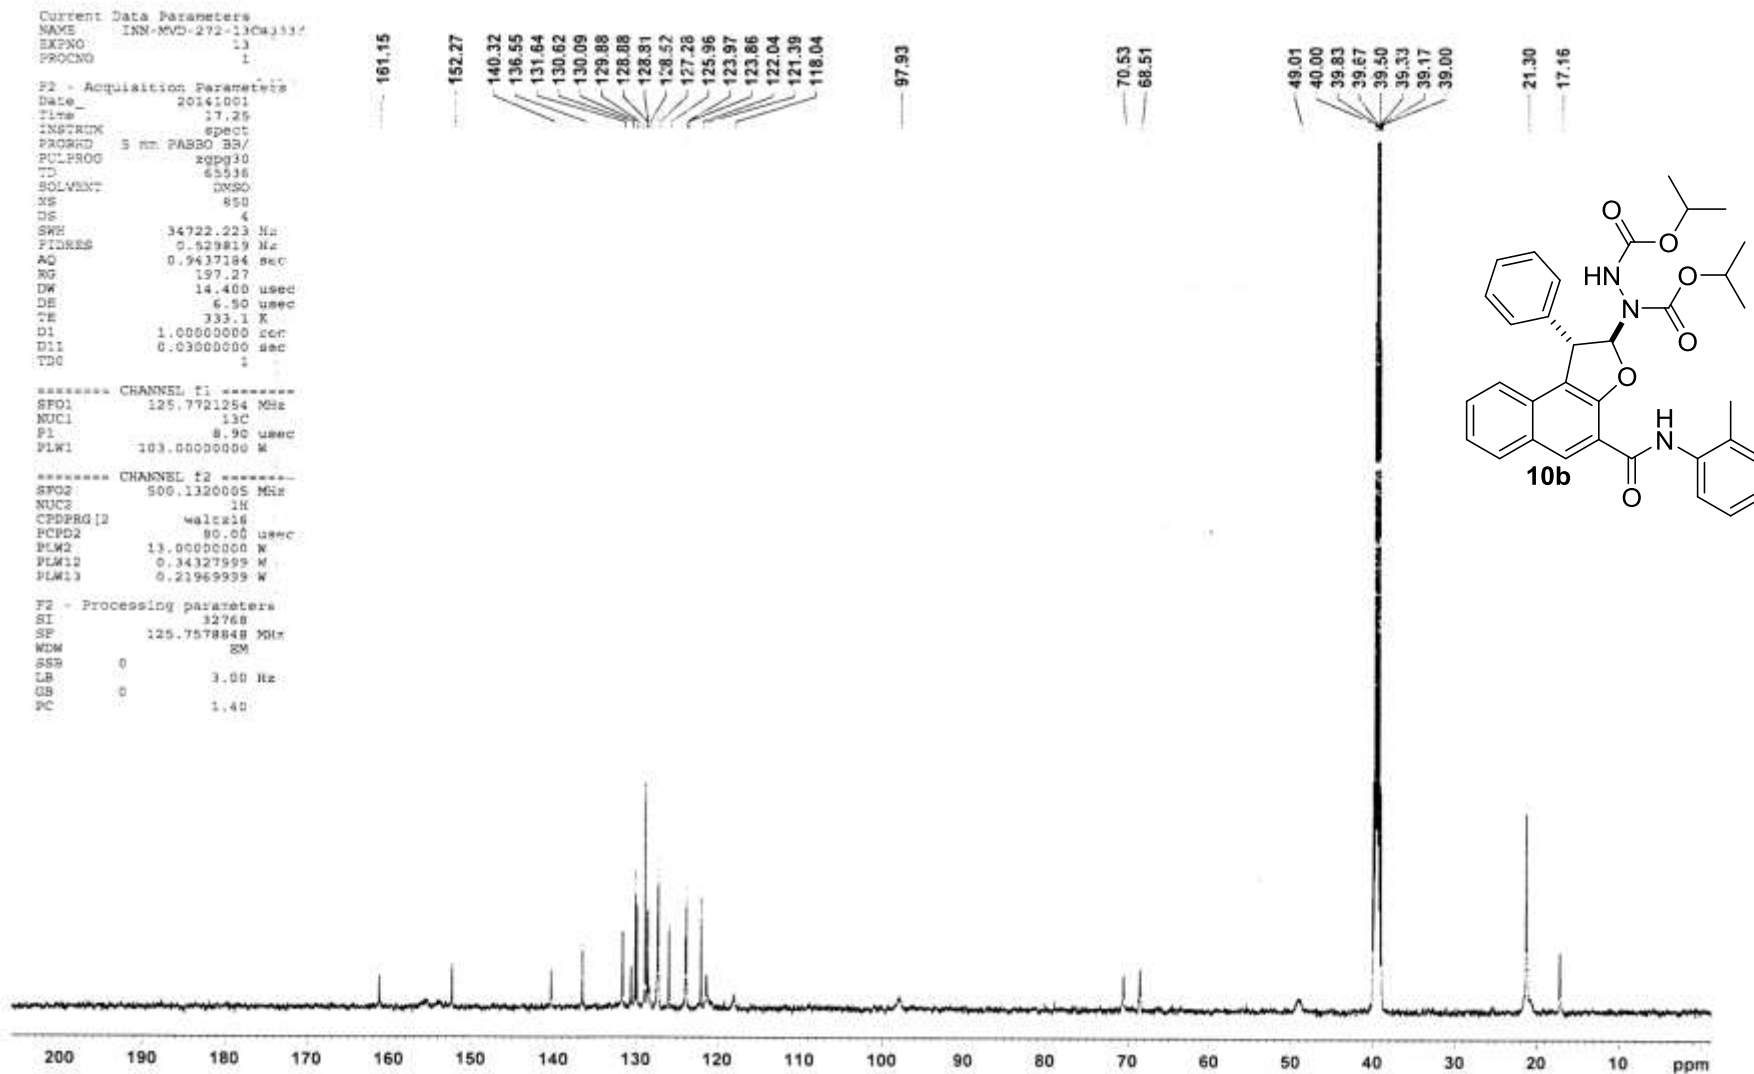

Figure S81.  $^{13}\text{C}$  NMR Spectrum of **10b** at 333 k

```

Current Data Parameters
NAME      inn-svd-167-1h
EXPNO     2
PROCNO    1

F2 - Acquisition Parameters
Date_     20131230
Time      21.33
INSTRUM   spect
PROBHD    5 mm PABBO BB/
PULPROG   zg30
TD         65536
SOLVENT   CDCl3
NS         6
DS         2
SWH        10000.000 Hz
FIDRES     0.152588 Hz
AQ         3.276799 sec
RG         30.72
DW         50.000 usec
DE         6.50 usec
TE         298.9 K
D1         1.00000000 sec
TDO        1

----- CHANNEL f1 -----
SFO1      500.1330885 MHz
NUC1       1H
P1         13.00 usec
PLW1       13.00000000 W

F2 - Processing parameters
SI         65536
SF         500.1300000 MHz
WDW        EM
SSB        0
LB         0.30 Hz
GB         0
PC         1.00

```

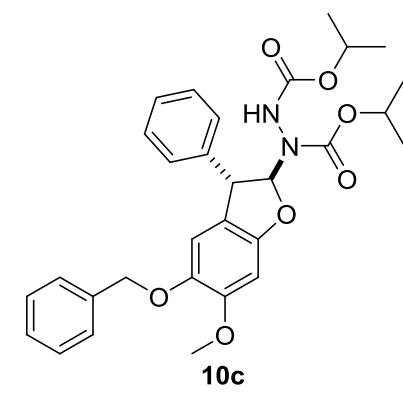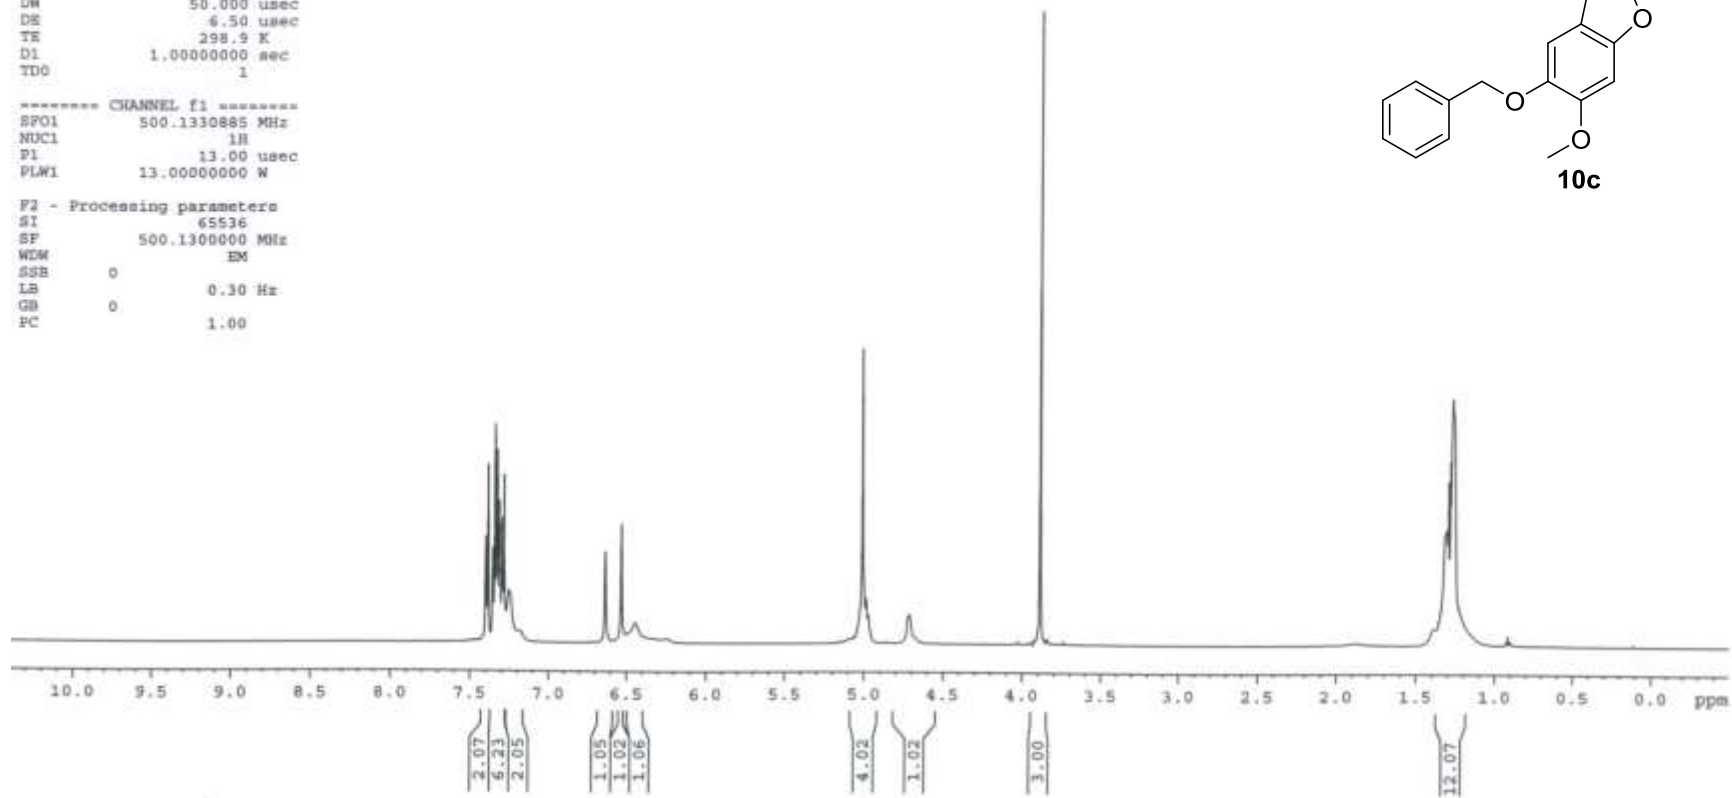

Figure S82. <sup>1</sup>H NMR Spectrum of **10c**

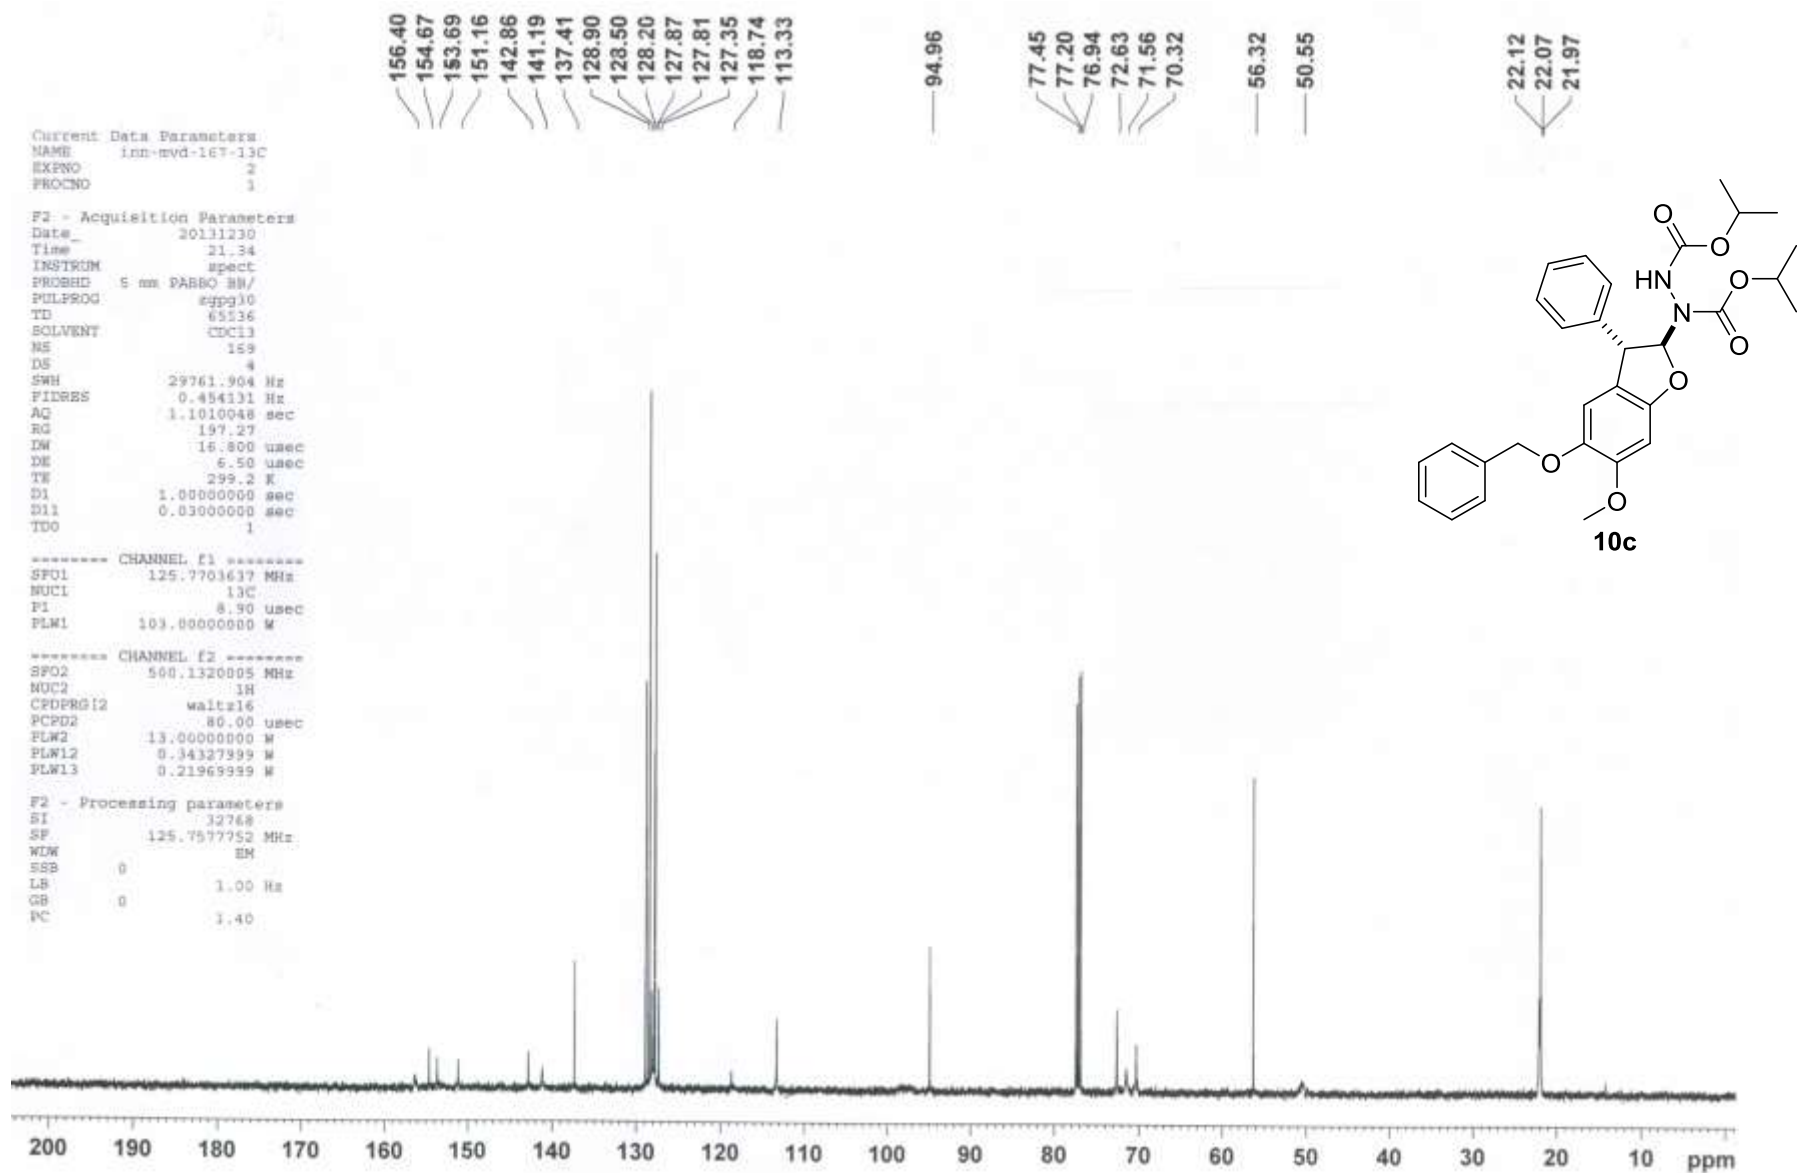

Figure S83.  $^{13}\text{C}$  NMR Spectrum of 10c
