# Supplementary material for: Synthesis of hydrazinoheterocycles from Morita–Baylis–Hillman adducts of nitroalkenes with azodicarboxylates
Source: Royal Society of Chemistry journal article supplement (doi:10.1039/c5ob02656c), 2016-01-01
Supplement: c5ob02656c2.pdf [file c5ob02656c2.pdf]

**Table S1.** Selected X-ray Data of **3e**

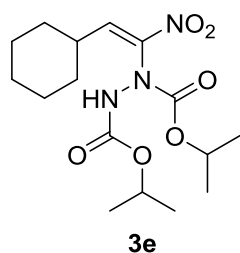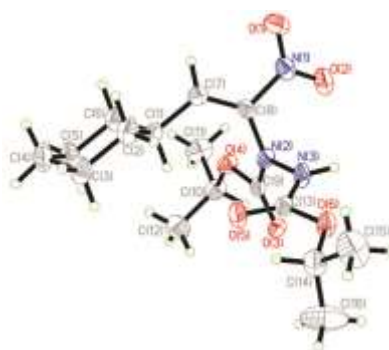

|                                   |                                                               |                 |
|-----------------------------------|---------------------------------------------------------------|-----------------|
| Identification code               | INN-MVD-CYCLOHEXYL                                            |                 |
| Empirical formula                 | C <sub>16</sub> H <sub>27</sub> N <sub>3</sub> O <sub>6</sub> |                 |
| Formula weight                    | 357.41                                                        |                 |
| Temperature                       | 293(2) K                                                      |                 |
| Wavelength                        | 0.71070 Å                                                     |                 |
| Crystal system                    | Triclinic                                                     |                 |
| Space group                       | P -1                                                          |                 |
| Unit cell dimensions              | a = 9.777(5) Å                                                | α = 102.265(7)° |
|                                   | b = 10.159(5) Å                                               | β = 100.480(6)° |
|                                   | c = 10.306(5) Å                                               | γ = 90.508(8)°  |
| Volume                            | 982.4(8) Å <sup>3</sup>                                       |                 |
| Z                                 | 2                                                             |                 |
| Density (calculated)              | 1.208 Mg/m <sup>3</sup>                                       |                 |
| Absorption coefficient            | 0.093 mm <sup>-1</sup>                                        |                 |
| F(000)                            | 384                                                           |                 |
| Crystal size                      | 0.230 x 0.190 x 0.130 mm <sup>3</sup>                         |                 |
| Theta range for data collection   | 3.03 to 29.30°                                                |                 |
| Index ranges                      | -13 ≤ h ≤ 13, -13 ≤ k ≤ 13, -14 ≤ l ≤ 14                      |                 |
| Reflections collected             | 17915                                                         |                 |
| Independent reflections           | 5352 (R <sub>int</sub> = 0.0759)                              |                 |
| Completeness to theta = 29.30°    | 99.4 %                                                        |                 |
| Absorption correction             | Numerical                                                     |                 |
| Max. and min. transmission        | 0.988 and 0.980                                               |                 |
| Refinement method                 | Full-matrix least-squares on F <sup>2</sup>                   |                 |
| Data / restraints / parameters    | 5352 / 0 / 226                                                |                 |
| Goodness-of-fit on F <sup>2</sup> | 0.872                                                         |                 |
| Final R indices [I > 2σ(I)]       | R1 = 0.0497, wR2 = 0.1054                                     |                 |
| R indices (all data)              | R1 = 0.0876, wR2 = 0.1212                                     |                 |
| Largest diff. peak and hole       | 0.228 and -0.217 e.Å <sup>-3</sup>                            |                 |

**Table S2.** Selected X-ray Data of **6b**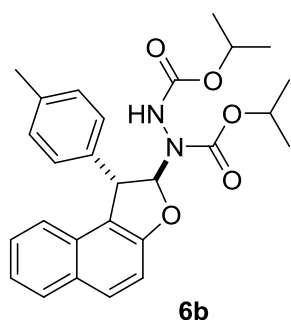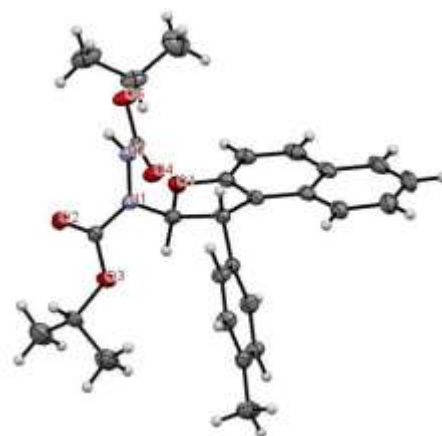

|                                   |                                                               |                 |
|-----------------------------------|---------------------------------------------------------------|-----------------|
| Identification code               | INN-MVD-164                                                   |                 |
| Empirical formula                 | C <sub>27</sub> H <sub>30</sub> N <sub>2</sub> O <sub>5</sub> |                 |
| Formula weight                    | 462.53                                                        |                 |
| Temperature                       | 150 K                                                         |                 |
| Wavelength                        | 0.71075 Å                                                     |                 |
| Crystal system                    | Triclinic                                                     |                 |
| Space group                       | P -1                                                          |                 |
| Unit cell dimensions              | a=11.116(3)Å                                                  | α= 63.523(15)°  |
|                                   | b = 11.260(3)Å                                                | β= 71.584(17)°  |
|                                   | c = 11.711(3)Å                                                | γ = 69.128(17)° |
| Volume                            | 1204.2(6) Å <sup>3</sup>                                      |                 |
| Z                                 | 2                                                             |                 |
| Density (calculated)              | 1.276 Mg/m <sup>3</sup>                                       |                 |
| Absorption coefficient            | 0.088 mm <sup>-1</sup>                                        |                 |
| F(000)                            | 492                                                           |                 |
| Crystal size                      | 0.350 x 0.270 x 0.130 mm                                      |                 |
| Theta range for data collection   | 3.064 to 25.000°                                              |                 |
| Index ranges                      | -13<=h<=13, -13<=k<=13, -13<=l<=13                            |                 |
| Reflections collected             | 12275                                                         |                 |
| Independent reflections           | 4222 [R <sub>(int)</sub> = 0.0404]                            |                 |
| Completeness to theta = 25.000°   | 99.6 %                                                        |                 |
| Absorption correction             | Numerical                                                     |                 |
| Max. and min. transmission        | 0.972, 0.989                                                  |                 |
| Refinement method                 | Full-matrix least-squares on F <sup>2</sup>                   |                 |
| Data / restraints / parameters    | 4222 / 0 / 319                                                |                 |
| Goodness-of-fit on F <sup>2</sup> | 1.040                                                         |                 |
| Final R indices [I>2sigma(I)]     | R1 = 0.0421, wR2 = 0.0969                                     |                 |
| R indices (all data)              | R1 = 0.0527, wR2 = 0.1031                                     |                 |
| Largest diff. peak and hole       | 0.213 and -0.208 e.Å <sup>-3</sup>                            |                 |
